# Supplementary material
Source: publisher figshare collection journal article supplement (https://gsajournals.figshare.com/ndownloader/files/16979180)
Supplement: Supplementary file 1 [file 16979180]

## Sheet: Sheet1
	Probe	FlyBase ID	FlyBase Gene Symbol	logFC	AveExpr	t statistic	P value	adjusted P value	B value	Pr(differentially expressed)
	1623884_at	FBgn0036767	CG16775	-1.17629	3.71621	-9.61292	1.7e-06	0.0323073	3.73761	0.976743
	1626830_at	FBgn0002531	Lcp1	0.964423	0.934783	8.83061	3.77e-06	0.0357107	3.30499	0.964599
	1640507_s_at	FBgn0250817	lncRNA:CR40465	0.920973	2.48228	7.90087	1.04e-05	0.0570889	2.70376	0.937248
	1623018_at	FBgn0033301	CG12780	-0.937467	5.07088	-7.65111	1.39e-05	0.0570889	2.52397	0.925805
	1624137_at	FBgn0031249	CG11911	-0.940274	4.69816	-7.58372	1.51e-05	0.0570889	2.47403	0.922301
	1634143_at	FBgn0033065	Cyp6w1	-0.79943	4.98725	-7.30265	2.11e-05	0.066524	2.25893	0.905418
	1623364_at	FBgn0034761	CG4250	0.886918	3.49044	7.10155	2.69e-05	0.0728881	2.09807	0.890716
	1639584_at	FBgn0033292	Cyp4ad1	0.598515	2.77141	6.63411	4.85e-05	0.102227	1.70051	0.845601
	1623126_at	FBgn0035186	CG13912	0.723637	2.16286	6.63522	4.85e-05	0.102227	1.7015	0.84573
	1627088_at	FBgn0038914	fit	1.04365	6.21696	6.46155	6.08e-05	0.115172	1.545	0.82419
	1633130_at	FBgn0262004	CG42822	0.844236	3.5079	6.16198	9.06e-05	0.14892	1.26329	0.779592
	1625026_at	FBgn0040609	CG3348	0.831375	4.33608	6.13229	9.43e-05	0.14892	1.23455	0.774614
	1629633_at	FBgn0028950	CG15255	-0.684011	3.85425	-5.94541	0.000121779	0.177535	1.05008	0.74079
	1638991_at	FBgn0036766	CG5506	-0.556806	6.21167	-5.67354	0.000178194	0.217974	0.770711	0.683675
	1637548_at	FBgn0004569	aos	0.646205	2.96338	5.5488	0.000212935	0.217974	0.63807	0.654317
	1640775_a_at	FBgn0010222	Nmdmc	0.679956	5.73946	5.53643	0.000216756	0.217974	0.624758	0.6513
	1624650_at	FBgn0053087	LRP1	0.463441	2.42407	5.5227	0.000221083	0.217974	0.609954	0.64793
	1625193_at	FBgn0051106	CG31106	0.50143	5.30734	5.49893	0.000228792	0.217974	0.584242	0.642043
	1637095_at	FBgn0031910	CG15818	-0.493845	3.64508	-5.48431	0.000233674	0.217974	0.568385	0.63839
	1624195_at	FBgn0033782	sug	0.509044	2.87504	5.39856	0.000264653	0.217974	0.474539	0.616457
	1631225_at	FBgn0034140	Lst	-0.617955	5.4962	-5.38381	0.000270411	0.217974	0.458258	0.612601
	1625341_at	FBgn0044872	FucTC	-0.483761	1.84511	-5.37181	0.000275194	0.217974	0.444982	0.609446
	1639196_at	FBgn0031654	Jon25Bii	-0.473931	7.43307	-5.36188	0.000279218	0.217974	0.433983	0.606824
	1639951_at	FBgn0032871	CG2611	0.615337	3.32006	5.34404	0.000286607	0.217974	0.41417	0.602087
	1639842_at	FBgn0038581	CG14314	-0.579439	4.12034	-5.31512	0.000299035	0.217974	0.381921	0.594336
	1625063_a_at	FBgn0051606	CG31606	0.596032	1.12527	5.26703	0.000320989	0.22531	0.327956	0.581262
	1636848_at	FBgn0036202	CG6024	0.417017	1.73654	5.21213	0.000348168	0.229083	0.265824	0.566067
	1641412_at	FBgn0051809	CG31809	-0.46061	0.985694	-5.20756	0.000350538	0.229083	0.260627	0.56479
	1628665_at	FBgn0036828	CG6841	0.416964	1.35586	5.0891	0.000418385	0.258222	0.124546	0.531096
	1638770_a_at	FBgn0039056	CenB1A	0.469726	2.72504	5.08278	0.000422377	0.258222	0.117212	0.52927
	1639364_at	FBgn0001285	Jon44E	0.49155	4.69145	5.0329	0.00045534	0.261499	0.0590714	0.514764
	1636340_at	FBgn0037778	mtTFB2	0.389783	1.46139	4.99542	0.000481898	0.261499	0.0150872	0.503772
	1641280_at	FBgn0033366	Ance-4	-0.431491	4.78759	-4.98919	0.000486474	0.261499	0.00774464	0.501936
	1630723_a_at	FBgn0033271	CG8708	-0.536819	4.96808	-4.98697	0.000488117	0.261499	0.0051243	0.501281
	1632433_at	FBgn0031194	CG17598	0.615088	1.64666	4.97544	0.000496727	0.261499	-0.00847236	0.497882
	1632289_at	FBgn0053333	CG33333	-0.448672	2.09304	-4.8932	0.000563068	0.284032	-0.106235	0.473466
	1626429_at	FBgn0002564	Lsp1gamma	1.84202	3.30439	4.88577	0.000569502	0.284032	-0.11512	0.471252
	1640562_at	FBgn0050033	CG30033	-0.891582	1.48325	-4.85487	0.000597136	0.290178	-0.152221	0.462018
	1640505_at	FBgn0259682	Jabba	0.55206	2.15475	4.8102	0.00063962	0.303052	-0.20616	0.448642
	1640505_at	FBgn0259682	Jabba	0.55206	2.15475	4.8102	0.00063962	0.303052	-0.20616	0.448642
	1640675_at	FBgn0085194	CG34165	0.5462	0.791059	4.79099	0.000658863	0.304556	-0.229469	0.442883
	1630186_at	FBgn0033368	CG13743	0.619398	2.36254	4.74981	0.000702224	0.311651	-0.279679	0.430532
	1626759_at	FBgn0083972	CG34136	0.418686	1.76364	4.74534	0.000707103	0.311651	-0.285141	0.429194
	1627068_at	FBgn0034053	Cyp4aa1	0.423131	1.51082	4.70612	0.00075154	0.320687	-0.333284	0.417442
	1635687_at	FBgn0033715	CG8490	0.434879	0.815636	4.69771	0.000761446	0.320687	-0.343643	0.414925
	1623416_at	FBgn0053265	Muc68E	-0.65424	2.79001	-4.68098	0.000781568	0.322006	-0.364289	0.409922
	1627869_at	FBgn0020906	Jon25Bi	-0.421098	7.65862	-4.64793	0.000822983	0.329981	-0.405222	0.400058
	1641736_at	FBgn0262898	lncRNA:CR43253	0.374026	0.110695	4.63329	0.000842068	0.329981	-0.423422	0.395698
	1641736_at	FBgn0262898	lncRNA:CR43253	0.374026	0.110695	4.63329	0.000842068	0.329981	-0.423422	0.395698
	1630831_at	FBgn0038631	CG7695	-0.35657	6.12533	-4.62494	0.000853159	0.329981	-0.433816	0.393215
	1632731_at	FBgn0033924	CG8613	0.395796	3.7909	4.54004	0.00097515	0.340361	-0.540265	0.368126
	1639366_at	FBgn0014859	Hr38	0.431069	1.62151	4.524	0.00100019	0.340361	-0.560519	0.363427
	1633076_at	FBgn0259682	Jabba	0.411365	3.70648	4.50718	0.00102718	0.340361	-0.581807	0.358517
	1633076_at	FBgn0259682	Jabba	0.411365	3.70648	4.50718	0.00102718	0.340361	-0.581807	0.358517
	1634430_at	FBgn0004655	wapl	-0.495887	2.03825	-4.50251	0.00103481	0.340361	-0.587728	0.357156
	1634430_at	FBgn0266848	wap	-0.495887	2.03825	-4.50251	0.00103481	0.340361	-0.587728	0.357156
	1640765_at	FBgn0023094	cyc	-0.441644	2.65921	-4.48395	0.00106574	0.340361	-0.611299	0.351763
	1625921_at	FBgn0262737	mub	0.416695	4.17941	4.48162	0.00106969	0.340361	-0.614267	0.351087
	1632120_at	FBgn0039768	CG15533	-0.397123	3.47381	-4.47388	0.00108292	0.340361	-0.624114	0.348846
	1638675_at	FBgn0032836	CG10680	-0.44322	7.49339	-4.46922	0.00109097	0.340361	-0.630052	0.347499
	1634709_at	FBgn0038202	CG12402	0.382403	1.96436	4.46878	0.00109174	0.340361	-0.630615	0.347371
	1639471_s_at	FBgn0033757	muskelin	0.403625	0.884244	4.46674	0.00109528	0.340361	-0.633208	0.346783
	1626350_at	FBgn0015569	alpha-Est10	0.360346	3.25088	4.46463	0.00109896	0.340361	-0.635901	0.346174
	1628331_at	FBgn0259822	Ca-beta	0.484069	2.78685	4.43801	0.00114654	0.340361	-0.669904	0.338518
	1636896_a_at	FBgn0031190	CG12576	-0.363683	5.30393	-4.41775	0.00118421	0.340361	-0.695876	0.332727
	1623015_at	FBgn0038609	Nup43	-0.429562	1.98915	-4.41248	0.00119421	0.340361	-0.702637	0.331228
	1635310_s_at	FBgn0051687	CG31687	0.426476	1.983	4.38711	0.00124366	0.340361	-0.735277	0.324038
	1635310_s_at	FBgn0263355	CG31688	0.426476	1.983	4.38711	0.00124366	0.340361	-0.735277	0.324038
	1626394_at	FBgn0039778	Jon99Fi	-0.585902	6.1623	-4.38143	0.00125503	0.340361	-0.742607	0.322434
	1623812_at	FBgn0036320	CG10943	-0.549425	2.28708	-4.37664	0.0012647	0.340361	-0.74879	0.321085
	1627040_at	FBgn0027507	CG1344	0.345619	3.39289	4.3647	0.00128914	0.340361	-0.76421	0.317733
	1639374_s_at	FBgn0000078	Amy-d	0.598966	8.91411	4.36461	0.00128933	0.340361	-0.76433	0.317707
	1639374_s_at	FBgn0000079	Amy-p	0.598966	8.91411	4.36461	0.00128933	0.340361	-0.76433	0.317707
	1641036_at	FBgn0085450	Snoo	0.416246	1.09021	4.36201	0.00129471	0.340361	-0.767683	0.31698
	1631693_at	FBgn0038214	CG9616	0.657344	1.76214	4.35593	0.00130741	0.340361	-0.775555	0.315279
	1632659_at	FBgn0261675	Npc1b	-0.400219	2.14221	-4.35421	0.00131101	0.340361	-0.777776	0.314799
	1640030_at	FBgn0028888	CG4168	0.398052	0.594567	4.33173	0.00135925	0.340505	-0.806936	0.308544
	1635442_a_at	FBgn0025595	AkhR	0.502574	4.15803	4.31852	0.00138845	0.340505	-0.824101	0.304894
	1635442_a_at	FBgn0025595	AkhR	0.502574	4.15803	4.31852	0.00138845	0.340505	-0.824101	0.304894
	1631261_at	FBgn0030360	CG1806	0.555453	1.92593	4.3181	0.0013894	0.340505	-0.824652	0.304777
	1633031_at	FBgn0034052	CG8299	0.597902	3.12809	4.30829	0.00141152	0.340505	-0.83742	0.302079
	1635585_at	FBgn0032911	tadr	0.376631	0.916374	4.30419	0.0014209	0.340505	-0.842771	0.300952
	1638592_at	FBgn0038916	dnd	0.434769	3.95099	4.28595	0.00146331	0.340505	-0.866566	0.295969
	1623675_at	FBgn0039682	Obp99c	0.915442	8.01062	4.28469	0.0014663	0.340505	-0.868219	0.295625
	1625910_at	FBgn0033439	CG1773	0.390628	1.05905	4.28441	0.00146697	0.340505	-0.868587	0.295548
	1625053_at	FBgn0034480	CG16898	0.380011	5.10875	4.28175	0.00147327	0.340505	-0.872055	0.294827
	1636631_at	FBgn0035300	CG1139	-0.382103	2.96592	-4.27286	0.0014946	0.341274	-0.883694	0.292413
	1634214_a_at	FBgn0062411	Ctr1C	0.361063	2.35708	4.25159	0.00154692	0.349014	-0.91157	0.286679
	1627077_at	FBgn0033490	CG12917	0.443925	3.55779	4.21271	0.00164759	0.367355	-0.962737	0.276331
	1637719_at	FBgn0036712	brv2	0.317676	0.505739	4.19305	0.00170112	0.371494	-0.988715	0.271166
	1624824_at	FBgn0023197	Jon74E	-0.330362	8.72161	-4.19152	0.00170536	0.371494	-0.990741	0.270766
	1639694_s_at	FBgn0033926	Arc1	0.544387	6.00222	4.16402	0.00178348	0.384096	-1.02718	0.26363
	1624695_at	FBgn0037801	CG3999	0.635688	2.30993	4.13963	0.00185591	0.395205	-1.05962	0.257383
	1627716_at	FBgn0038067	CG11598	0.526143	5.98449	4.13039	0.00188415	0.396761	-1.07193	0.255036
	1634192_at	FBgn0050281	CG30281	0.421143	0.52973	4.11823	0.001922	0.397775	-1.08815	0.251967
	1630906_at	FBgn0029895	CG14441	0.362771	1.76732	4.10089	0.00197737	0.397775	-1.11133	0.247622
	1628376_x_at	FBgn0031277	CG13947	-0.410279	5.82894	-4.09311	0.00200275	0.397775	-1.12175	0.245687
	1635894_at	FBgn0050148	CG30148	0.447231	1.78419	4.08349	0.00203461	0.397775	-1.13465	0.243305
	1640687_at	FBgn0032851	CG13970	0.461306	1.10259	4.08319	0.0020356	0.397775	-1.13504	0.243232
	1634604_at	FBgn0004643	Zw10	-0.315406	1.6161	-4.07181	0.00207399	0.397775	-1.15032	0.240431
	1634604_at	FBgn0004643	Zw10	-0.315406	1.6161	-4.07181	0.00207399	0.397775	-1.15032	0.240431
	1638872_at	FBgn0001230	Hsp68	0.350358	3.566	4.06136	0.00210993	0.397775	-1.16437	0.237875
	1637537_at	FBgn0000464	Lar	0.431608	2.37612	4.05288	0.00213955	0.397775	-1.17577	0.235813
	1639130_a_at	FBgn0001311	kkv	0.411378	1.43418	4.04408	0.00217076	0.397775	-1.18763	0.233683
	1631021_at	FBgn0263143	vret	0.40863	0.955391	4.04381	0.00217173	0.397775	-1.18799	0.233618
	1633527_a_at	FBgn0015615	SMC3	0.40648	1.35176	4.04045	0.00218378	0.397775	-1.19252	0.232808
	1625671_at	FBgn0053532	lectin-37Da	-0.464073	4.92827	-4.03801	0.00219256	0.397775	-1.19581	0.232222
	1625671_at	FBgn0053533	lectin-37Db	-0.464073	4.92827	-4.03801	0.00219256	0.397775	-1.19581	0.232222
	1623002_at	FBgn0051404	CG31404	-0.367752	3.36343	-4.0241	0.00224339	0.397775	-1.21458	0.228891
	1627075_at	FBgn0045497	Gr22e	0.40152	0.228608	4.02386	0.00224427	0.397775	-1.2149	0.228834
	1637801_at	FBgn0086348	se	0.434915	2.46303	4.01909	0.00226199	0.397775	-1.22135	0.227699
	1623933_at	FBgn0003380	Sh	0.561883	2.80131	4.01113	0.0022919	0.397775	-1.23212	0.225811
	1633327_at	FBgn0031208	CG11023	0.437262	4.21912	4.00605	0.0023112	0.397775	-1.239	0.224611
	1623478_at	FBgn0029768	SPR	0.399179	2.91777	4.00092	0.00233084	0.397775	-1.24594	0.223405
	1635127_at	FBgn0085427	CG34398	0.315248	2.26917	3.99703	0.00234588	0.397775	-1.25121	0.22249
	1625387_s_at	FBgn0011766	E2f1	0.349621	3.6067	3.98861	0.00237873	0.397775	-1.26262	0.220523
	1625387_s_at	FBgn0024371	E2f2	0.349621	3.6067	3.98861	0.00237873	0.397775	-1.26262	0.220523
	1625387_s_at	FBgn0025615	Torsin	0.349621	3.6067	3.98861	0.00237873	0.397775	-1.26262	0.220523
	1634960_at	FBgn0038147	CCHa2	0.403397	5.27601	3.98624	0.00238807	0.397775	-1.26584	0.21997
	1639479_a_at	FBgn0001320	kni	-0.325003	0.408375	-3.98507	0.0023927	0.397775	-1.26743	0.219698
	1635998_at	FBgn0035985	Cpr67B	-0.322691	5.51564	-3.97143	0.00244729	0.403314	-1.28595	0.216539
	1627837_at	FBgn0039564	Nep7	-0.397779	0.692765	-3.95383	0.0025197	0.411667	-1.30991	0.212502
	1623613_at	FBgn0040333	brv3	0.450456	1.64052	3.93905	0.00258218	0.417087	-1.33005	0.209151
	1639394_at	FBgn0002578	Kaz-m1	-0.356136	4.04627	-3.91634	0.00268141	0.417087	-1.36107	0.204066
	1626537_at	FBgn0032719	CG17321	0.343834	1.08711	3.91129	0.00270404	0.417087	-1.36799	0.202944
	1628684_at	FBgn0037766	Teh1	0.318797	0.360856	3.91012	0.00270926	0.417087	-1.36958	0.202687
	1624342_at	FBgn0034295	CG10911	-0.33149	7.57979	-3.8965	0.00277136	0.417087	-1.38825	0.199688
	1634296_s_at	FBgn0264494	CG17646	0.297817	5.87139	3.89626	0.00277248	0.417087	-1.38858	0.199635
	1629748_s_at	FBgn0037541	CG2747	0.332023	2.34637	3.89546	0.00277615	0.417087	-1.38967	0.199461
	1628475_at	FBgn0032935	Atg18b	0.383877	3.51357	3.89311	0.00278705	0.417087	-1.3929	0.198945
	1628475_at	FBgn0032935	Atg18b	0.383877	3.51357	3.89311	0.00278705	0.417087	-1.3929	0.198945
	1625828_at	FBgn0039628	CG11841	-0.328438	4.40683	-3.88787	0.00281145	0.417087	-1.40008	0.197803
	1624395_at	FBgn0051102	CG31102	-0.336009	2.97498	-3.87846	0.00285589	0.417087	-1.41301	0.19576
	1636510_a_at	FBgn0039114	Lsd-1	0.436571	6.21213	3.87794	0.00285833	0.417087	-1.41371	0.195649
	1623971_at	FBgn0031775	CG9150	-0.530868	2.57699	-3.87029	0.002895	0.417087	-1.42423	0.194
	1626073_a_at	FBgn0002873	mud	0.358845	3.28109	3.86743	0.00290886	0.417087	-1.42816	0.193385
	1639180_at	FBgn0033926	Arc1	0.508507	6.22089	3.86711	0.0029104	0.417087	-1.4286	0.193317
	1634591_at	FBgn0039310	CG11878	-0.363969	4.98946	-3.86477	0.0029218	0.417087	-1.43183	0.192814
	1634985_at	FBgn0264908	pHCl-1	0.310874	1.0016	3.86146	0.00293796	0.417087	-1.43638	0.192107
	1633154_at	FBgn0086916	snky	0.338216	1.39159	3.85609	0.00296443	0.417087	-1.44378	0.190961
	1629934_at	FBgn0031033	CG14219	-0.547035	0.749656	-3.84647	0.00301241	0.417087	-1.45703	0.188922
	1628696_at	FBgn0040942	CG12643	-0.464668	2.69255	-3.84166	0.00303668	0.417087	-1.46365	0.187909
	1627447_at	FBgn0033278	CG14759	0.917668	4.21235	3.84005	0.0030449	0.417087	-1.46589	0.187569
	1635979_at	FBgn0064766	CG7600	0.366658	3.55453	3.83727	0.00305905	0.417087	-1.46971	0.186986
	1636287_at	FBgn0035619	Alp10	-0.469818	3.82402	-3.81131	0.0031948	0.429409	-1.50559	0.181593
	1638338_a_at	FBgn0000639	Fbp1	1.37314	3.4216	3.80244	0.00324262	0.429409	-1.51787	0.179775
	1626789_at	FBgn0039203	CG13618	-0.396109	3.57199	-3.79467	0.0032851	0.429409	-1.52864	0.178193
	1624567_at	FBgn0031090	Rab35	0.472518	1.30609	3.79287	0.00329503	0.429409	-1.53114	0.177828
	1635318_at	FBgn0013307	Odc1	-0.375138	4.17933	-3.79265	0.00329622	0.429409	-1.53143	0.177784
	1629133_at	FBgn0029861	CG3815	0.395355	0.982472	3.77894	0.00337287	0.433324	-1.55046	0.17502
	1636857_at	FBgn0035309	CG15879	0.435307	1.08575	3.777	0.00338391	0.433324	-1.55316	0.17463
	1630732_at	FBgn0031456	Tnpo-SR	0.415954	1.15738	3.76214	0.00346935	0.441282	-1.57381	0.171675
	1627539_at	FBgn0026402	NiPp1	0.463865	2.47855	3.746	0.00356478	0.445266	-1.59629	0.168501
	1626296_at	FBgn0260659	CG42542	0.370266	1.56166	3.74535	0.00356866	0.445266	-1.59719	0.168375
	1624071_at	FBgn0039405	PIG-P	0.339814	2.48399	3.74493	0.00357115	0.445266	-1.59777	0.168294
	1624071_at	FBgn0260224	CG42498	0.339814	2.48399	3.74493	0.00357115	0.445266	-1.59777	0.168294
	1630524_at	FBgn0004435	Galphaq	0.543383	2.19082	3.73588	0.00362594	0.449143	-1.61038	0.166535
	1630524_at	FBgn0004435	Galphaq	0.543383	2.19082	3.73588	0.00362594	0.449143	-1.61038	0.166535
	1624732_at	FBgn0063495	GstE5	-0.298033	4.09463	-3.7304	0.00365956	0.450363	-1.61803	0.165476
	1637206_at	FBgn0034071	CG8405	0.494717	2.09882	3.72413	0.0036984	0.45136	-1.62679	0.164271
	1630051_at	FBgn0033124	Tsp42Ec	-0.304255	3.61742	-3.721	0.00371789	0.45136	-1.63115	0.163673
	1639454_at	FBgn0034296	CG10912	-0.683013	5.63671	-3.71763	0.00373911	0.45136	-1.63587	0.163028
	1641069_at	FBgn0037881	GCC88	0.398523	1.20298	3.69958	0.0038546	0.462356	-1.66111	0.159613
	1641069_at	FBgn0037881	GCC88	0.398523	1.20298	3.69958	0.0038546	0.462356	-1.66111	0.159613
	1624596_at	FBgn0051463	CG31463	-0.459005	2.76118	-3.68584	0.003945	0.463725	-1.68036	0.157048
	1630244_s_at	FBgn0051809	CG31809	-0.628136	3.70763	-3.67715	0.0040033	0.463725	-1.69254	0.155442
	1630244_s_at	FBgn0051810	CG31810	-0.628136	3.70763	-3.67715	0.0040033	0.463725	-1.69254	0.155442
	1637029_at	FBgn0266801	CG45263	0.328473	1.31828	3.67391	0.00402527	0.463725	-1.69709	0.154846
	1637029_at	FBgn0266801	CG45263	0.328473	1.31828	3.67391	0.00402527	0.463725	-1.69709	0.154846
	1635812_at	FBgn0032387	CG16965	-0.408402	2.6858	-3.66497	0.00408654	0.463725	-1.70964	0.15321
	1623020_at	FBgn0031360	CG31937	0.32242	4.85405	3.66426	0.00409142	0.463725	-1.71063	0.153082
	1623817_at	FBgn0028534	CG7916	-0.309795	7.12459	-3.66081	0.00411535	0.463725	-1.71548	0.152454
	1632251_s_at	FBgn0032340	Ge-1	0.294334	2.91069	3.65421	0.0041615	0.463725	-1.72475	0.151261
	1631288_at	FBgn0030314	CG11696	0.326631	1.19941	3.65059	0.00418709	0.463725	-1.72985	0.150607
	1640264_at	FBgn0085405	CG34376	0.359961	1.60156	3.65024	0.00418953	0.463725	-1.73033	0.150545
	1627632_at	FBgn0040900	CG17777	0.517135	3.87071	3.64641	0.00421679	0.463725	-1.73572	0.149857
	1639803_at	FBgn0036576	CG5151	0.341404	2.75472	3.64336	0.00423864	0.463725	-1.74002	0.14931
	1639803_at	FBgn0052152	CG32152	0.341404	2.75472	3.64336	0.00423864	0.463725	-1.74002	0.14931
	1628272_a_at	FBgn0263830	CG40486	1.24505	4.39731	3.64256	0.00424435	0.463725	-1.74114	0.149168
	1641729_at	FBgn0036600	CG13043	0.394506	0.524141	3.64167	0.00425075	0.463725	-1.74239	0.149009
	1623840_at	FBgn0034429	AANATL4	0.558987	1.23772	3.63983	0.00426405	0.463725	-1.74499	0.14868
	1637301_a_at	FBgn0003429	slo	0.311701	3.16499	3.63959	0.00426575	0.463725	-1.74532	0.148638
	1638506_at	FBgn0033097	Zip42C.2	0.300805	0.287462	3.63142	0.00432515	0.463725	-1.75683	0.147188
	1638506_at	FBgn0033097	Zip42C.2	0.300805	0.287462	3.63142	0.00432515	0.463725	-1.75683	0.147188
	1640337_a_at	FBgn0261788	Ank2	0.332412	2.99106	3.62975	0.00433739	0.463725	-1.75918	0.146893
	1629678_a_at	FBgn0040281	Aplip1	0.366119	1.87537	3.62701	0.00435762	0.463725	-1.76305	0.146409
	1625487_at	FBgn0036831	CG6839	-0.50621	3.55069	-3.62433	0.00437745	0.463725	-1.76683	0.145937
	1641526_a_at	FBgn0262483	Rbp	0.315257	2.75229	3.624	0.00437985	0.463725	-1.76728	0.145881
	1632273_at	FBgn0039207	CG5789	0.275543	2.81042	3.61946	0.00441366	0.464705	-1.77368	0.145085
	1634037_s_at	FBgn0011481	Ssdp	0.288212	3.63597	3.6162	0.00443814	0.464705	-1.77829	0.144515
	1636218_at	FBgn0034133	knon	0.299964	4.39358	3.59625	0.00459094	0.47545	-1.80647	0.141065
	1634653_a_at	FBgn0004370	Ptp10D	0.414392	1.6619	3.5804	0.0047161	0.485738	-1.82888	0.138372
	1629597_a_at	FBgn0034075	Asph	0.311089	6.17154	3.57162	0.004787	0.485738	-1.84131	0.136896
	1640131_a_at	FBgn0037897	CG5270	0.319089	2.60835	3.57119	0.00479054	0.485738	-1.84193	0.136823
	1634182_at	FBgn0035488	CG11593	0.294537	3.44062	3.56251	0.00486171	0.485738	-1.85422	0.135378
	1637841_at	FBgn0033199	CG17985	0.286273	2.30666	3.56082	0.00487573	0.485738	-1.85662	0.135097
	1640802_at	FBgn0085357	CG34328	0.325034	2.13855	3.55819	0.00489754	0.485738	-1.86035	0.134663
	1631387_at	FBgn0050344	CG30344	0.364575	5.07917	3.55568	0.00491853	0.485738	-1.86391	0.134248
	1634623_a_at	FBgn0033302	Cyp6a14	-0.702157	2.41539	-3.5524	0.00494603	0.485738	-1.86856	0.133708
	1624962_at	FBgn0036790	AstC-R1	0.321772	0.269676	3.55234	0.00494657	0.485738	-1.86865	0.133698
	1624962_at	FBgn0036790	AstC-R1	0.321772	0.269676	3.55234	0.00494657	0.485738	-1.86865	0.133698
	1639968_at	FBgn0033972	Ciao1	-0.293568	3.99326	-3.54864	0.00497784	0.486289	-1.87391	0.13309
	1629417_s_at	FBgn0038246	CG14853	0.386491	1.56085	3.53894	0.00506068	0.491846	-1.88768	0.131509
	1640126_at	FBgn0034045	CG8249	0.265792	3.54637	3.52778	0.00515779	0.498727	-1.90354	0.129708
	1627512_at	FBgn0051915	CG31915	0.358471	0.75463	3.51998	0.00522683	0.499499	-1.91464	0.128461
	1622908_a_at	FBgn0030073	CG10962	0.407033	1.91389	3.51939	0.00523209	0.499499	-1.91548	0.128367
	1622908_a_at	FBgn0264384	lncRNA:CR43836	0.407033	1.91389	3.51939	0.00523209	0.499499	-1.91548	0.128367
	1633775_at	FBgn0051665	wry	0.382396	4.09841	3.51679	0.00525534	0.499499	-1.91918	0.127953
	1632011_at	FBgn0043069	MESK4	0.431924	1.47914	3.51502	0.0052712	0.499499	-1.9217	0.127673
	1632011_at	FBgn0051274	CG31274	0.431924	1.47914	3.51502	0.0052712	0.499499	-1.9217	0.127673
	1626837_a_at	FBgn0260657	CG42540	0.300616	4.41865	3.50071	0.00540143	0.505476	-1.94208	0.12542
	1626086_at	FBgn0032726	CG10621	0.350768	5.22651	3.49917	0.00541569	0.505476	-1.94428	0.125179
	1625740_at	FBgn0031981	Megf8	0.272295	2.41964	3.49772	0.00542907	0.505476	-1.94634	0.124953
	1624252_s_at	FBgn0037810	sle	0.296437	5.21378	3.48805	0.00551949	0.51027	-1.96014	0.123452
	1624252_s_at	FBgn0037811	CG12592	0.296437	5.21378	3.48805	0.00551949	0.51027	-1.96014	0.123452
	1627975_at	FBgn0038838	TotB	0.30295	0.0703266	3.4801	0.0055949	0.51473	-1.97148	0.12223
	1633381_at	FBgn0030096	Zpr1	0.295242	2.21129	3.47571	0.00563698	0.515864	-1.97774	0.12156
	1632135_a_at	FBgn0000662	fl(2)d	0.279873	4.01202	3.47316	0.00566165	0.515864	-1.98139	0.121171
	1628232_at	FBgn0050046	CG30046	0.347972	1.25911	3.45357	0.00585447	0.520686	-2.00939	0.11822
	1636524_at	FBgn0085345	CG34316	-0.430539	1.2711	-3.45238	0.00586645	0.520686	-2.0111	0.118042
	1623932_at	FBgn0036319	Ent3	0.331956	2.95405	3.44958	0.0058946	0.520686	-2.01511	0.117626
	1635096_at	FBgn0005630	lola	0.337238	1.9478	3.44734	0.00591725	0.520686	-2.01831	0.117293
	1636170_at	FBgn0039151	CG13607	0.42238	2.93922	3.44036	0.0059883	0.520686	-2.0283	0.116264
	1631496_at	FBgn0035006	CG4563	-0.280722	2.47073	-3.4403	0.00598897	0.520686	-2.02839	0.116254
	1631649_at	FBgn0033657	Sln	0.382106	1.61772	3.43969	0.00599525	0.520686	-2.02927	0.116164
	1638879_a_at	FBgn0053012	CG33012	0.273962	0.625409	3.438	0.00601259	0.520686	-2.03168	0.115916
	1638192_a_at	FBgn0046685	Wsck	0.36082	2.4745	3.43759	0.00601679	0.520686	-2.03227	0.115856
	1633667_at	FBgn0024740	Lip2	0.293904	3.29312	3.42974	0.00609825	0.52133	-2.04352	0.114709
	1627352_at	FBgn0022774	Oat	0.314333	4.56678	3.42561	0.00614149	0.52133	-2.04944	0.114109
	1637294_at	FBgn0263456	nwk	0.279175	4.59922	3.42546	0.00614313	0.52133	-2.04966	0.114087
	1627456_s_at	FBgn0262737	mub	0.358253	5.08998	3.42544	0.00614335	0.52133	-2.04969	0.114084
	1640025_at	FBgn0031829	IFT52	0.629203	0.884523	3.42369	0.00616177	0.52133	-2.05219	0.113831
	1640025_at	FBgn0031829	IFT52	0.629203	0.884523	3.42369	0.00616177	0.52133	-2.05219	0.113831
	1641700_at	FBgn0039158	CG6182	0.428692	0.859701	3.41014	0.00630648	0.531202	-2.07163	0.111885
	1630733_s_at	FBgn0259222	CG42322	0.342712	2.06483	3.40467	0.00636595	0.533158	-2.07949	0.111107
	1635485_at	FBgn0264490	Eip93F	-0.280803	1.46725	-3.39892	0.00642907	0.533158	-2.08775	0.110293
	1634717_at	FBgn0040755	CG17580	0.369685	2.65381	3.39831	0.00643575	0.533158	-2.08862	0.110208
	1625065_s_at	FBgn0029761	SK	0.313552	3.38032	3.39772	0.00644223	0.533158	-2.08946	0.110125
	1631948_s_at	FBgn0003068	per	0.296636	2.96636	3.39514	0.00647085	0.533198	-2.09317	0.109762
	1640310_at	FBgn0037730	CG9444	0.398681	1.09509	3.38584	0.00657501	0.535958	-2.10655	0.108462
	1624624_at	FBgn0002873	mud	0.315731	3.41155	3.38458	0.00658918	0.535958	-2.10835	0.108288
	1623646_at	FBgn0031463	G6P	0.287235	2.95595	3.37423	0.0067073	0.539974	-2.12324	0.106858
	1623646_at	FBgn0031463	G6P	0.287235	2.95595	3.37423	0.0067073	0.539974	-2.12324	0.106858
	1623605_a_at	FBgn0043364	cbt	0.264824	5.88265	3.37393	0.00671083	0.539974	-2.12368	0.106816
	1634048_a_at	FBgn0027348	bgm	-0.251217	6.19755	-3.37022	0.00675373	0.539974	-2.12902	0.106308
	1641105_at	FBgn0013531	MED20	0.383792	1.45158	3.36787	0.00678101	0.539974	-2.1324	0.105987
	1623532_at	FBgn0085265	CG34236	-0.487492	1.4962	-3.35485	0.00693447	0.541473	-2.15116	0.104223
	1624121_at	FBgn0001321	knk	0.345114	1.06257	3.35469	0.00693638	0.541473	-2.15139	0.104202
	1633783_a_at	FBgn0029835	CG5921	-0.369272	3.03117	-3.35356	0.00694985	0.541473	-2.15301	0.10405
	1635250_at	FBgn0265189	sud1	0.359321	2.20578	3.35334	0.00695244	0.541473	-2.15333	0.104021
	1635250_at	FBgn0265190	PIG-S	0.359321	2.20578	3.35334	0.00695244	0.541473	-2.15333	0.104021
	1635250_at	FBgn0265190	PIG-S	0.359321	2.20578	3.35334	0.00695244	0.541473	-2.15333	0.104021
	1627802_s_at	FBgn0038504	Sur-8	0.288727	3.96186	3.35177	0.00697126	0.541473	-2.15559	0.10381
	1641058_at	FBgn0035529	Fdx2	0.296856	5.56497	3.34836	0.00701229	0.541562	-2.16051	0.103353
	1631466_at	FBgn0039601	CG1523	0.365827	1.86071	3.34693	0.00702956	0.541562	-2.16258	0.103162
	1636474_at	FBgn0032373	Vha100-5	-0.255222	3.57052	-3.32078	0.00735301	0.557227	-2.20031	0.099723
	1623726_at	FBgn0037611	CG11755	-0.280646	1.58683	-3.32074	0.00735357	0.557227	-2.20037	0.0997172
	1633522_at	FBgn0259146	fid	-0.274201	0.564577	-3.31999	0.00736298	0.557227	-2.20144	0.0996209
	1636846_at	FBgn0086372	lap	0.264056	4.2	3.31562	0.00741871	0.557227	-2.20777	0.0990549
	1627693_at	FBgn0037466	CG1965	0.32099	2.51746	3.31434	0.00743502	0.557227	-2.20961	0.0988906
	1625685_at	FBgn0086359	Invadolysin	0.336215	3.12001	3.31014	0.00748896	0.557227	-2.21568	0.0983514
	1636884_s_at	FBgn0032170	CG4658	-0.265162	3.97862	-3.31001	0.0074907	0.557227	-2.21587	0.0983341
	1625436_at	FBgn0003961	Uro	-0.450136	5.3826	-3.30651	0.00753599	0.557227	-2.22093	0.0978865
	1637712_at	FBgn0050007	tea	0.420467	1.74946	3.30542	0.00755011	0.557227	-2.2225	0.0977479
	1641634_at	FBgn0002565	Lsp2	0.67812	8.67497	3.30344	0.00757596	0.557227	-2.22537	0.0974952
	1627383_at	FBgn0000140	asp	0.345444	3.07944	3.30071	0.0076116	0.557227	-2.22931	0.0971491
	1635912_at	FBgn0036260	Rh7	0.364576	0.902511	3.29993	0.0076219	0.557227	-2.23045	0.0970496
	1631326_at	FBgn0035917	Zasp66	0.417246	2.46812	3.29315	0.00771154	0.557227	-2.24026	0.096193
	1632345_at	FBgn0032002	CG8353	0.344397	3.04855	3.2931	0.00771208	0.557227	-2.24032	0.0961878
	1624165_a_at	FBgn0019947	Psn	0.308464	3.95835	3.29256	0.00771931	0.557227	-2.24111	0.0961195
	1623597_s_at	FBgn0263780	CG17684	0.313605	1.87314	3.29097	0.00774057	0.557227	-2.24341	0.095919
	1641570_s_at	FBgn0042175	CG18858	-0.434596	5.10823	-3.28814	0.00777842	0.557227	-2.24751	0.0955645
	1641570_s_at	FBgn0051683	CG31683	-0.434596	5.10823	-3.28814	0.00777842	0.557227	-2.24751	0.0955645
	1630685_at	FBgn0031134	CG1314	0.266857	4.73424	3.28685	0.00779568	0.557227	-2.24937	0.0954038
	1630506_at	FBgn0031457	CG3077	-0.269516	2.13902	-3.28338	0.00784245	0.557227	-2.25439	0.0949713
	1640065_at	FBgn0063493	GstE7	0.539125	4.6337	3.2828	0.00785034	0.557227	-2.25524	0.0948987
	1633714_at	FBgn0031414	eys	0.294206	4.20647	3.28043	0.00788241	0.557416	-2.25866	0.0946052
	1640589_at	FBgn0023081	gek	0.284468	3.52126	3.27527	0.0079529	0.558299	-2.26614	0.0939667
	1624978_at	FBgn0053309	CG33309	0.333176	4.06755	3.27521	0.00795382	0.558299	-2.26623	0.0939585
	1630860_at	FBgn0004880	scrt	0.269416	3.04822	3.26856	0.00804547	0.56052	-2.27585	0.0931426
	1631218_at	FBgn0028789	Doc1	0.264842	1.67787	3.26661	0.00807263	0.56052	-2.27868	0.0929038
	1638886_at	FBgn0037722	CG8319	0.277521	0.696352	3.2665	0.00807419	0.56052	-2.27885	0.0928902
	1639047_at	FBgn0043884	mask	0.269421	4.74006	3.26272	0.00812709	0.562134	-2.28433	0.092429
	1638358_s_at	FBgn0265598	Bx	0.337279	0.984014	3.25826	0.00818977	0.564409	-2.29078	0.0918891
	1635173_at	FBgn0031681	Pgant5	0.255031	4.05472	3.25199	0.008279	0.56715	-2.29989	0.0911323
	1637709_at	FBgn0051797	CG31797	0.371663	2.62928	3.25126	0.0082894	0.56715	-2.30094	0.091045
	1638903_at	FBgn0038082	CG5724	-0.516335	2.61883	-3.24722	0.00834745	0.568031	-2.30681	0.0905609
	1630375_at	FBgn0030993	Mec2	-0.402312	2.4195	-3.2462	0.00836221	0.568031	-2.30829	0.0904387
	1626339_at	FBgn0264560	garz	0.275861	3.87161	3.24079	0.00844061	0.568696	-2.31613	0.0897958
	1632055_at	FBgn0043471	kappaTry	-0.303374	4.79461	-3.23566	0.00851586	0.568696	-2.32359	0.0891881
	1634128_at	FBgn0035569	CG15876	0.370472	3.13672	3.23215	0.00856756	0.568696	-2.32868	0.0887758
	1623612_at	FBgn0033574	Spn47C	0.412639	4.66273	3.23058	0.00859083	0.568696	-2.33095	0.0885915
	1633816_at	FBgn0035144	Kah	0.374823	0.784982	3.22993	0.00860061	0.568696	-2.33191	0.0885144
	1633816_at	FBgn0035144	Kah	0.374823	0.784982	3.22993	0.00860061	0.568696	-2.33191	0.0885144
	1630741_s_at	FBgn0037906	PGRP-LB	-0.472927	3.04849	-3.22827	0.00862529	0.568696	-2.33432	0.0883203
	1626172_at	FBgn0264606	Fife	0.33228	1.95624	3.22629	0.00865476	0.568696	-2.33719	0.0880897
	1626172_at	FBgn0264606	Fife	0.33228	1.95624	3.22629	0.00865476	0.568696	-2.33719	0.0880897
	1628241_at	FBgn0032873	CG2614	0.370026	2.89068	3.22431	0.00868443	0.568696	-2.34006	0.0878589
	1640999_at	FBgn0000307	chif	0.303772	2.15981	3.22382	0.00869182	0.568696	-2.34078	0.0878016
	1640999_at	FBgn0087041	CG42231	0.303772	2.15981	3.22382	0.00869182	0.568696	-2.34078	0.0878016
	1626615_at	FBgn0051156	CG31156	-0.299654	0.90755	-3.22152	0.00872642	0.568696	-2.34412	0.0875346
	1624306_at	FBgn0039369	CG17195	-0.293466	4.37694	-3.2186	0.00877061	0.568696	-2.34836	0.087196
	1635260_at	FBgn0027363	Stam	0.241733	5.14896	3.21662	0.00880066	0.568696	-2.35124	0.0869674
	1630675_at	FBgn0039370	CG4956	0.277038	3.22855	3.21401	0.00884054	0.568696	-2.35504	0.0866661
	1623834_at	FBgn0031426	CG18641	0.676304	1.88069	3.21379	0.00884394	0.568696	-2.35536	0.0866406
	1627835_a_at	FBgn0051973	Cda5	0.253588	3.96817	3.21351	0.00884824	0.568696	-2.35577	0.0866082
	1630677_at	FBgn0034401	MetRS	0.2537	5.05834	3.20859	0.00892382	0.568696	-2.36292	0.0860442
	1640145_at	FBgn0010292	bys	-0.289575	2.28217	-3.20621	0.00896063	0.568696	-2.36638	0.0857724
	1623706_at	FBgn0031801	CG9498	0.33495	5.69115	3.20611	0.00896209	0.568696	-2.36652	0.0857617
	1623332_at	FBgn0039684	Obp99d	0.281748	0.0501192	3.20595	0.00896468	0.568696	-2.36676	0.0857427
	1628133_at	FBgn0032473	kmg	0.270281	1.6916	3.20546	0.00897214	0.568696	-2.36746	0.0856878
	1641605_at	FBgn0024943	PIP82	0.279164	2.59551	3.20287	0.00901253	0.569352	-2.37124	0.0853924
	1633162_at	FBgn0034788	CG13532	0.306041	0.714604	3.19529	0.00913142	0.574028	-2.38226	0.0845357
	1634574_a_at	FBgn0265045	Strn-Mlck	0.580317	5.41354	3.1943	0.00914713	0.574028	-2.3837	0.0844239
	1638788_at	FBgn0052574	Twdlalpha	0.32018	1.92651	3.19044	0.00920845	0.575969	-2.38932	0.0839906
	1626802_a_at	FBgn0003380	Sh	0.304183	3.74947	3.18307	0.0093266	0.576772	-2.40004	0.0831694
	1623459_at	FBgn0265137	Spn42Da	0.265337	4.17196	3.17982	0.00937935	0.576772	-2.40479	0.0828084
	1638498_s_at	FBgn0033188	Drat	0.247683	5.68033	3.17946	0.00938511	0.576772	-2.4053	0.0827692
	1638498_s_at	FBgn0033188	Drat	0.247683	5.68033	3.17946	0.00938511	0.576772	-2.4053	0.0827692
	1627327_at	FBgn0035434	Drsl5	-0.380939	6.86916	-3.17616	0.00943891	0.576772	-2.41011	0.0824049
	1630516_at	FBgn0031184	CG14615	-0.315419	1.80246	-3.17425	0.00947013	0.576772	-2.41289	0.0821951
	1626922_at	FBgn0051876	Cpr30F	0.362273	1.11028	3.16207	0.00967205	0.576772	-2.43064	0.080866
	1633540_at	FBgn0043791	phu	0.379604	0.545353	3.16101	0.00968989	0.576772	-2.43219	0.0807509
	1638413_at	FBgn0036024	CG18180	0.3828	7.98126	3.15792	0.0097419	0.576772	-2.43669	0.0804172
	1636758_s_at	FBgn0003082	phr	-0.48053	4.99641	-3.15777	0.00974442	0.576772	-2.43691	0.0804011
	1636758_s_at	FBgn0042173	CG18853	-0.48053	4.99641	-3.15777	0.00974442	0.576772	-2.43691	0.0804011
	1623687_at	FBgn0030270	CG15199	0.424596	3.2504	3.15759	0.00974747	0.576772	-2.43717	0.0803817
	1638344_at	FBgn0032477	CG5287	-0.315255	3.24363	-3.1564	0.00976761	0.576772	-2.43891	0.0802534
	1640746_at	FBgn0037731	CG18542	-0.30773	4.07177	-3.15439	0.00980167	0.576772	-2.44184	0.0800374
	1640746_at	FBgn0052939	CG32939	-0.30773	4.07177	-3.15439	0.00980167	0.576772	-2.44184	0.0800374
	1625243_a_at	FBgn0000541	E(bx)	0.298306	3.96786	3.15264	0.00983148	0.576772	-2.44439	0.0798495
	1634515_at	FBgn0033999	CG8093	-0.288555	5.42691	-3.14834	0.00990491	0.576772	-2.45066	0.0793906
	1639424_at	FBgn0036262	CG6910	-0.363875	6.85417	-3.14699	0.00992822	0.576772	-2.45263	0.0792462
	1639448_at	FBgn0263025	HSPBAP1	-1.83679	1.8319	-3.1463	0.00994012	0.576772	-2.45364	0.0791727
	1628826_at	FBgn0085317	CG34288	-0.382266	2.48947	-3.14628	0.00994042	0.576772	-2.45367	0.0791708
	1627847_s_at	FBgn0040063	yip3	0.459653	2.08196	3.14596	0.00994595	0.576772	-2.45413	0.0791367
	1641248_at	FBgn0039584	beat-VI	0.356275	1.57927	3.14376	0.00998399	0.576772	-2.45735	0.0789029
	1636910_at	FBgn0035583	CG13704	-0.325996	3.86741	-3.14343	0.00998958	0.576772	-2.45782	0.0788687
	1633496_at	FBgn0035888	CG7120	0.258975	0.389356	3.14162	0.010021	0.576772	-2.46046	0.0786771
	1633255_at	FBgn0053325	CG33325	0.296778	3.88492	3.14135	0.0100257	0.576772	-2.46086	0.0786483
	1631268_at	FBgn0015905	ast	0.249146	1.10615	3.13792	0.0100854	0.576772	-2.46585	0.0782869
	1639494_at	FBgn0085470	lmgB	0.256815	2.09955	3.13729	0.0100965	0.576772	-2.46678	0.0782202
	1639494_at	FBgn0250903	lmgA	0.256815	2.09955	3.13729	0.0100965	0.576772	-2.46678	0.0782202
	1627014_a_at	FBgn0037913	fabp	0.268074	8.67364	3.13687	0.0101039	0.576772	-2.46739	0.078176
	1640534_s_at	FBgn0264607	CaMKII	0.324708	4.36947	3.13224	0.0101853	0.578114	-2.47415	0.0776907
	1633451_at	FBgn0030479	Rbp1-like	0.272721	3.93475	3.12755	0.0102685	0.580173	-2.481	0.077201
	1640035_at	FBgn0000640	Fbp2	1.31555	4.00724	3.12658	0.0102859	0.580173	-2.48242	0.0770999
	1631222_at	FBgn0261588	pdm3	0.272175	3.69551	3.12196	0.0103685	0.581817	-2.48915	0.0766222
	1630652_at	FBgn0262564	lncRNA:CR43104	0.251055	2.1537	3.11923	0.0104177	0.581817	-2.49314	0.0763404
	1635518_at	FBgn0004227	nonA	0.32232	1.38808	3.11876	0.0104262	0.581817	-2.49382	0.0762923
	1631783_at	FBgn0264979	CG4267	-0.396658	2.57025	-3.11562	0.0104833	0.581817	-2.49842	0.0759691
	1625316_s_at	FBgn0267912	CanA-14F	0.302018	3.9233	3.1109	0.0105695	0.581817	-2.50532	0.0754863
	1625266_at	FBgn0015010	Ag5r	-0.254674	6.76367	-3.10637	0.0106528	0.581817	-2.51192	0.0750264
	1637188_s_at	FBgn0263077	CG43340	0.277987	4.78225	3.10324	0.0107108	0.581817	-2.5165	0.0747096
	1628659_at	FBgn0004512	Mdr49	0.265927	5.22059	3.1028	0.010719	0.581817	-2.51714	0.0746651
	1627250_at	FBgn0261836	Msp300	0.275902	1.5461	3.1027	0.0107209	0.581817	-2.51729	0.074655
	1627250_at	FBgn0261836	Msp300	0.275902	1.5461	3.1027	0.0107209	0.581817	-2.51729	0.074655
	1628364_at	FBgn0028532	CG7968	-0.302956	5.03999	-3.09914	0.0107874	0.581817	-2.5225	0.0742961
	1641033_a_at	FBgn0004395	unk	0.27066	0.620679	3.09878	0.0107941	0.581817	-2.52302	0.0742603
	1633390_at	FBgn0260938	tay	0.297754	3.4178	3.0983	0.0108032	0.581817	-2.52373	0.0742114
	1632358_at	FBgn0259199	Snup	0.242039	0.625754	3.09782	0.0108121	0.581817	-2.52442	0.0741636
	1632358_at	FBgn0259199	Snup	0.242039	0.625754	3.09782	0.0108121	0.581817	-2.52442	0.0741636
	1632358_at	FBgn0259200	CG42304	0.242039	0.625754	3.09782	0.0108121	0.581817	-2.52442	0.0741636
	1632072_at	FBgn0083970	CG34134	0.278116	4.38503	3.09722	0.0108234	0.581817	-2.5253	0.0741034
	1632160_s_at	FBgn0028886	CG15279	0.248878	3.78162	3.095	0.0108652	0.581817	-2.52854	0.0738812
	1633050_at	FBgn0037782	Npc2d	-0.311261	5.26528	-3.09455	0.0108736	0.581817	-2.5292	0.0738362
	1633765_at	FBgn0270926	AsnS	0.327862	2.43803	3.08934	0.0109725	0.581817	-2.53682	0.0733166
	1627493_at	FBgn0031913	CG5958	0.293075	6.62714	3.08885	0.0109818	0.581817	-2.53753	0.0732685
	1624008_at	FBgn0023512	eIF2Bepsilon	-0.234062	2.67326	-3.08755	0.0110067	0.581817	-2.53944	0.0731389
	1627121_s_at	FBgn0260934	par-1	0.342334	1.32823	3.08679	0.0110212	0.581817	-2.54055	0.0730636
	1627379_at	FBgn0052311	zormin	-0.382951	0.962435	-3.08504	0.0110546	0.581817	-2.5431	0.0728912
	1635243_at	FBgn0051371	CG31371	-0.303594	0.336508	-3.08345	0.0110854	0.581817	-2.54544	0.0727334
	1640220_a_at	FBgn0038683	CG11779	-0.251947	3.57293	-3.08185	0.0111162	0.581817	-2.54778	0.072576
	1639183_a_at	FBgn0021776	mira	0.27002	0.215748	3.08125	0.0111277	0.581817	-2.54865	0.0725173
	1634729_at	FBgn0086445	l(2)37Cd	0.260892	0.747175	3.07988	0.0111542	0.581817	-2.55065	0.0723828
	1640422_a_at	FBgn0050401	dany	0.252185	0.387601	3.07927	0.011166	0.581817	-2.55154	0.0723229
	1633155_at	FBgn0035845	CG13675	0.272181	0.405848	3.07076	0.0113323	0.581817	-2.564	0.0714919
	1640284_at	FBgn0000303	ChAT	0.282096	3.73409	3.06953	0.0113565	0.581817	-2.56579	0.0713726
	1635367_at	FBgn0004656	fs(1)h	-0.267451	1.8776	-3.06893	0.0113684	0.581817	-2.56667	0.0713143
	1628420_s_at	FBgn0037944	CG6923	0.305847	3.55056	3.06783	0.0113901	0.581817	-2.56828	0.0712078
	1625430_at	FBgn0031700	CG14022	-0.264578	5.8099	-3.06732	0.0114002	0.581817	-2.56903	0.0711584
	1638447_s_at	FBgn0033177	CG11141	0.318851	3.17235	3.06462	0.011454	0.581817	-2.57299	0.0708971
	1637717_at	FBgn0003366	sev	0.243837	2.97377	3.06286	0.011489	0.581817	-2.57556	0.0707281
	1632488_a_at	FBgn0061359	CG33671	-0.251066	4.52705	-3.06224	0.0115013	0.581817	-2.57646	0.0706688
	1632488_a_at	FBgn0061360	CG33672	-0.251066	4.52705	-3.06224	0.0115013	0.581817	-2.57646	0.0706688
	1627345_at	FBgn0086610	CG33342	0.247049	0.219764	3.06164	0.0115133	0.581817	-2.57734	0.0706111
	1636763_at	FBgn0053922	CG33922	0.359915	0.0735598	3.06156	0.011515	0.581817	-2.57747	0.0706027
	1636763_at	FBgn0053923	CG33923	0.359915	0.0735598	3.06156	0.011515	0.581817	-2.57747	0.0706027
	1637561_at	FBgn0040096	lectin-33A	0.347133	1.86532	3.05911	0.011564	0.581817	-2.58104	0.0703685
	1641136_at	FBgn0037069	Cpr78Cc	0.247941	0.254897	3.0586	0.0115742	0.581817	-2.58179	0.0703197
	1635840_s_at	FBgn0005616	msl-2	-0.326501	0.710706	-3.05711	0.0116044	0.581817	-2.58398	0.0701765
	1629864_at	FBgn0024998	CG2685	0.241438	1.08832	3.05406	0.011666	0.582736	-2.58844	0.069886
	1638933_at	FBgn0002901	mus304	0.271398	1.17849	3.05316	0.0116842	0.582736	-2.58976	0.0698006
	1624508_at	FBgn0034774	CG13526	0.249798	4.6802	3.0454	0.0118429	0.586985	-2.60112	0.0690664
	1635580_at	FBgn0020224	Cbl	0.293116	2.60522	3.04369	0.0118781	0.586985	-2.60362	0.0689057
	1633009_a_at	FBgn0262007	CG42825	-0.640056	4.55912	-3.0424	0.0119049	0.586985	-2.60552	0.068784
	1625746_at	FBgn0035152	CG3386	0.437753	1.42566	3.04225	0.0119079	0.586985	-2.60573	0.0687704
	1631217_a_at	FBgn0010424	TpnC73F	0.251168	3.71774	3.04146	0.0119243	0.586985	-2.60689	0.0686964
	1630008_at	FBgn0039149	CG18428	0.34019	2.84208	3.03941	0.011967	0.587562	-2.6099	0.0685039
	1631164_a_at	FBgn0033744	Dh44-R2	0.352366	1.20394	3.03584	0.0120414	0.589685	-2.61512	0.0681716
	1639483_s_at	FBgn0029843	Nep1	0.293988	2.02188	3.03057	0.0121522	0.59139	-2.62284	0.0676827
	1627761_at	FBgn0261574	kug	0.333437	1.8927	3.02976	0.0121694	0.59139	-2.62403	0.0676076
	1624302_at	FBgn0039730	CG7903	0.284821	1.78425	3.02974	0.0121698	0.59139	-2.62406	0.0676059
	1624833_a_at	FBgn0000037	mAChR-A	0.410934	0.918246	3.02709	0.0122261	0.591754	-2.62795	0.0673614
	1624833_a_at	FBgn0000037	mAChR-A	0.410934	0.918246	3.02709	0.0122261	0.591754	-2.62795	0.0673614
	1638535_a_at	FBgn0262593	Shab	0.268318	0.989067	3.02645	0.0122397	0.591754	-2.62889	0.0673023
	1624800_at	FBgn0034354	GstE11	0.472566	2.92116	3.02236	0.0123271	0.594461	-2.63488	0.0669271
	1630955_at	FBgn0031422	PIG-Wa	0.30157	0.890711	3.02034	0.0123706	0.595042	-2.63784	0.0667422
	1641014_at	FBgn0031129	CG1324	0.298592	7.44914	3.01776	0.0124262	0.596205	-2.64162	0.0665071
	1639487_at	FBgn0032088	CG13102	-0.356811	4.42543	-3.01376	0.012513	0.597344	-2.64749	0.0661439
	1627007_at	FBgn0036787	CG4306	0.377638	4.88943	3.01052	0.0125836	0.599187	-2.65223	0.0658515
	1641567_at	FBgn0003360	sesB	-0.224717	9.71355	-3.0091	0.0126148	0.599187	-2.65432	0.0657233
	1641567_at	FBgn0028583	lcs	-0.224717	9.71355	-3.0091	0.0126148	0.599187	-2.65432	0.0657233
	1633198_a_at	FBgn0087012	5-HT2A	0.273798	1.94452	3.00651	0.0126718	0.600392	-2.65812	0.0654902
	1633198_a_at	FBgn0087012	5-HT2A	0.273798	1.94452	3.00651	0.0126718	0.600392	-2.65812	0.0654902
	1624914_at	FBgn0033297	Mal-A8	-0.344107	6.928	-3.00229	0.0127652	0.603152	-2.66431	0.0651127
	1638896_at	FBgn0035281	Cpr62Bc	0.374292	3.29026	3.001	0.0127938	0.603152	-2.66619	0.0649981
	1627532_at	FBgn0263738	Ada2a	-0.241536	1.54064	-2.99396	0.0129516	0.603955	-2.67652	0.064373
	1627532_at	FBgn0263757	Rpb4	-0.241536	1.54064	-2.99396	0.0129516	0.603955	-2.67652	0.064373
	1633641_a_at	FBgn0034194	CG15611	0.286898	3.36965	2.99297	0.0129738	0.603955	-2.67797	0.0642861
	1623084_at	FBgn0003371	sgg	0.334281	3.95139	2.99263	0.0129816	0.603955	-2.67847	0.0642557
	1629877_at	FBgn0042175	CG18858	-0.264305	2.94329	-2.99075	0.0130242	0.603955	-2.68123	0.0640898
	1629877_at	FBgn0051683	CG31683	-0.264305	2.94329	-2.99075	0.0130242	0.603955	-2.68123	0.0640898
	1640085_at	FBgn0039759	CG9733	0.344323	0.826314	2.98894	0.0130651	0.603955	-2.68388	0.0639313
	1633790_at	FBgn0050043	CG30043	-0.259743	0.772486	-2.98633	0.0131248	0.603955	-2.68772	0.063702
	1637971_a_at	FBgn0037684	Srr	0.329803	4.82339	2.98527	0.013149	0.603955	-2.68927	0.0636095
	1628080_at	FBgn0030013	GIIIspla2	0.242172	4.23313	2.98397	0.0131787	0.603955	-2.69117	0.0634962
	1632852_s_at	FBgn0001142	Gs1	0.245502	6.2835	2.97914	0.01329	0.603955	-2.69826	0.0630759
	1638222_at	FBgn0033344	CG8252	0.239898	4.55095	2.97801	0.0133163	0.603955	-2.69993	0.0629776
	1630269_s_at	FBgn0003415	skd	0.248479	1.75608	2.97763	0.0133251	0.603955	-2.70048	0.0629449
	1631620_at	FBgn0004507	GlyP	0.254824	8.34419	2.97625	0.0133571	0.603955	-2.70251	0.0628255
	1626800_at	FBgn0032964	CG11630	0.436703	1.30883	2.97617	0.013359	0.603955	-2.70263	0.0628186
	1623468_at	FBgn0035210	msd5	0.232335	0.806578	2.97604	0.0133619	0.603955	-2.70281	0.0628079
	1638174_at	FBgn0035360	CG1246	-0.252865	3.43369	-2.97586	0.0133661	0.603955	-2.70307	0.0627923
	1637386_at	FBgn0265959	rdgC	0.317195	3.49258	2.97461	0.0133953	0.603955	-2.70491	0.0626842
	1636256_s_at	FBgn0260869	CG42579	0.32584	1.80108	2.9737	0.0134166	0.603955	-2.70625	0.0626055
	1636256_s_at	FBgn0260870	CG42580	0.32584	1.80108	2.9737	0.0134166	0.603955	-2.70625	0.0626055
	1623491_at	FBgn0032669	CG15155	0.44297	5.77187	2.97225	0.0134504	0.603955	-2.70838	0.0624809
	1624609_at	FBgn0051279	CG31279	0.345236	2.22465	2.97099	0.01348	0.603955	-2.71023	0.0623726
	1625385_at	FBgn0086909	CG31751	0.22965	0.863702	2.96876	0.0135323	0.604868	-2.71349	0.062182
	1631471_at	FBgn0259244	CG42342	0.356525	0.574526	2.96662	0.0135829	0.605703	-2.71664	0.0619987
	1637749_at	FBgn0053517	Dop2R	0.389689	0.967706	2.96113	0.0137134	0.608104	-2.7247	0.0615317
	1637749_at	FBgn0053517	Dop2R	0.389689	0.967706	2.96113	0.0137134	0.608104	-2.7247	0.0615317
	1623517_at	FBgn0036597	CG4962	0.434143	3.13266	2.96011	0.0137377	0.608104	-2.72619	0.0614455
	1639395_at	FBgn0051269	CG31269	-0.256136	1.20202	-2.958	0.0137883	0.608104	-2.72929	0.0612672
	1633706_at	FBgn0038645	CG7714	0.388985	1.53213	2.95763	0.0137972	0.608104	-2.72983	0.0612359
	1628623_at	FBgn0040336	Seipin	0.306315	2.60366	2.95176	0.0139391	0.611503	-2.73846	0.0607419
	1630531_at	FBgn0038853	RhoGAP93B	0.269178	3.15767	2.95151	0.0139451	0.611503	-2.73882	0.0607212
	1622901_at	FBgn0034553	CG9993	0.305619	1.95733	2.94723	0.0140495	0.611503	-2.74511	0.0603637
	1631235_at	FBgn0034829	CG9899	0.342849	1.11273	2.94579	0.0140848	0.611503	-2.74722	0.0602439
	1624064_at	FBgn0030738	CG9915	-0.22265	2.92057	-2.94553	0.0140912	0.611503	-2.7476	0.0602222
	1624700_a_at	FBgn0039084	CG10175	0.304455	2.38959	2.94385	0.0141325	0.611503	-2.75007	0.0600828
	1632355_at	FBgn0029006	Smurf	0.265158	3.18646	2.93941	0.0142422	0.612874	-2.75659	0.0597158
	1632355_at	FBgn0029006	Smurf	0.265158	3.18646	2.93941	0.0142422	0.612874	-2.75659	0.0597158
	1636098_at	FBgn0035957	CG5144	0.228891	4.9205	2.93731	0.0142945	0.612874	-2.75968	0.0595424
	1638110_at	FBgn0267429	CG45782	0.36225	3.11388	2.93677	0.0143079	0.612874	-2.76046	0.0594984
	1635675_at	FBgn0028993	scro	0.244167	1.54228	2.93487	0.0143554	0.612874	-2.76326	0.0593421
	1625705_s_at	FBgn0000581	E(Pc)	0.317018	0.525244	2.93402	0.0143765	0.612874	-2.7645	0.0592729
	1629476_at	FBgn0036738	CG7542	-0.399947	5.26866	-2.93362	0.0143866	0.612874	-2.76509	0.0592401
	1636005_at	FBgn0034293	CG14495	-0.290145	1.79412	-2.93285	0.014406	0.612874	-2.76623	0.0591767
	1634262_s_at	FBgn0025674	CycK	-0.259211	2.38746	-2.93218	0.0144229	0.612874	-2.76721	0.0591219
	1633599_a_at	FBgn0003067	Pepck1	0.264164	8.48361	2.93069	0.0144604	0.612966	-2.7694	0.0590001
	1633533_at	FBgn0033872	CG6329	0.255249	7.41524	2.92952	0.0144897	0.612966	-2.77111	0.0589054
	1638979_a_at	FBgn0002872	mu2	-0.246312	0.894539	-2.9252	0.0145994	0.615641	-2.77747	0.0585541
	1627225_at	FBgn0031760	Tsp26A	-0.293472	0.442495	-2.92337	0.014646	0.615641	-2.78015	0.0584061
	1635382_at	FBgn0001624	dlg1	0.229799	4.44845	2.92195	0.0146824	0.615641	-2.78225	0.0582912
	1627885_s_at	FBgn0036483	CG12316	0.28802	1.81003	2.91829	0.0147763	0.615641	-2.78762	0.0579967
	1634422_at	FBgn0051213	CG31213	0.358171	3.29223	2.91603	0.0148345	0.615641	-2.79093	0.0578161
	1628362_s_at	FBgn0029686	Glos	0.360591	3.3676	2.916	0.0148354	0.615641	-2.79098	0.0578133
	1628362_s_at	FBgn0052783	CG32783	0.360591	3.3676	2.916	0.0148354	0.615641	-2.79098	0.0578133
	1628362_s_at	FBgn0052786	CG32786	0.360591	3.3676	2.916	0.0148354	0.615641	-2.79098	0.0578133
	1626268_at	FBgn0263029	CG43324	0.334191	1.17875	2.91502	0.0148607	0.615641	-2.79242	0.057735
	1626268_at	FBgn0263076	Klp54D	0.334191	1.17875	2.91502	0.0148607	0.615641	-2.79242	0.057735
	1639490_at	FBgn0053547	Rim	0.226459	3.51162	2.91501	0.0148609	0.615641	-2.79244	0.0577343
	1633602_at	FBgn0035624	Eaf6	0.226223	2.11729	2.91472	0.0148686	0.615641	-2.79287	0.0577107
	1624472_at	FBgn0035647	CG10486	-0.586115	1.03151	-2.91241	0.0149285	0.615641	-2.79626	0.0575265
	1628716_at	FBgn0032613	Nepl9	-0.260166	3.23349	-2.91188	0.0149423	0.615641	-2.79704	0.0574845
	1624313_at	FBgn0010905	Spn	0.255427	2.26894	2.91186	0.0149427	0.615641	-2.79706	0.057483
	1633963_a_at	FBgn0032151	nAChRalpha6	0.250924	2.44474	2.9101	0.0149886	0.616192	-2.79965	0.0573432
	1633963_a_at	FBgn0032151	nAChRalpha6	0.250924	2.44474	2.9101	0.0149886	0.616192	-2.79965	0.0573432
	1629145_at	FBgn0031107	HERC2	0.288629	2.23706	2.90371	0.0151567	0.619914	-2.80905	0.0568371
	1631768_at	FBgn0022986	qkr58E-1	0.27934	3.00319	2.90157	0.0152132	0.619914	-2.81219	0.0566692
	1638359_s_at	FBgn0028953	CG14478	0.305617	3.11064	2.90087	0.0152317	0.619914	-2.81321	0.0566145
	1638337_at	FBgn0086909	CG31751	0.221822	0.935442	2.8982	0.0153028	0.619914	-2.81713	0.0564053
	1630056_at	FBgn0052054	CG32054	-0.309273	2.23745	-2.89753	0.0153207	0.619914	-2.81812	0.0563526
	1635639_a_at	FBgn0000567	Eip74EF	0.304818	2.41474	2.89733	0.0153261	0.619914	-2.81842	0.056337
	1626068_at	FBgn0040092	lectin-46Cb	-0.26148	5.99909	-2.89358	0.0154267	0.620237	-2.82393	0.0560445
	1641473_at	FBgn0000636	Fas3	0.252233	0.290848	2.89299	0.0154424	0.620237	-2.82479	0.0559991
	1624186_at	FBgn0036028	CG16717	0.288506	2.58347	2.89134	0.0154869	0.620237	-2.82722	0.0558711
	1637604_at	FBgn0261545	CG42663	-0.218277	0.0343207	-2.8898	0.0155286	0.620237	-2.82948	0.0557516
	1633520_at	FBgn0052027	lncRNA:CR32027	-0.351816	1.15927	-2.889	0.0155503	0.620237	-2.83066	0.0556896
	1638486_at	FBgn0260944	Rbp1	0.223074	2.64407	2.88808	0.0155753	0.620237	-2.83201	0.0556185
	1626685_at	FBgn0040354	CG14418	0.247774	0.203864	2.88685	0.0156087	0.620237	-2.83382	0.0555236
	1623333_a_at	FBgn0026713	l(1)G0007	0.260929	1.71104	2.88661	0.0156153	0.620237	-2.83418	0.0555049
	1626494_at	FBgn0037141	DNApol-eta	-0.224314	0.319398	-2.88412	0.0156831	0.620237	-2.83783	0.0553138
	1623622_a_at	FBgn0033950	CG12862	0.275019	0.0699487	2.88147	0.0157559	0.620237	-2.84174	0.0551101
	1632808_at	FBgn0032615	CG6012	-0.39538	2.75845	-2.88043	0.0157844	0.620237	-2.84326	0.0550309
	1630438_at	FBgn0052409	CG32409	-0.336684	1.64966	-2.87934	0.0158145	0.620237	-2.84486	0.0549474
	1635138_at	FBgn0004509	Fur1	0.297446	2.21185	2.87835	0.0158419	0.620237	-2.84632	0.0548718
	1629885_at	FBgn0259209	Mlp60A	0.367851	2.19236	2.87809	0.0158491	0.620237	-2.84671	0.0548518
	1637701_at	FBgn0050042	Cpr49Ab	0.285137	5.12707	2.87782	0.0158566	0.620237	-2.8471	0.0548312
	1632492_at	FBgn0029747	CG5062	0.331752	3.9647	2.87724	0.0158725	0.620237	-2.84795	0.0547875
	1633232_at	FBgn0085354	CG34325	0.229533	5.08845	2.87518	0.0159296	0.620539	-2.85098	0.0546309
	1639659_at	FBgn0021875	Zfrp8	-0.280982	0.91922	-2.8746	0.0159457	0.620539	-2.85183	0.054587
	1625006_at	FBgn0030365	Tango4	-0.293205	0.759379	-2.87178	0.0160243	0.621067	-2.85597	0.0543735
	1640006_at	FBgn0034382	CG18609	-0.282352	6.26551	-2.87176	0.0160248	0.621067	-2.856	0.054372
	1623666_at	FBgn0036549	CG10516	0.382535	5.14405	2.86941	0.0160906	0.621942	-2.85946	0.0541946
	1630376_at	FBgn0028996	onecut	0.274989	2.66415	2.86862	0.016113	0.621942	-2.86063	0.0541346
	1641307_at	FBgn0029639	CG14419	0.375786	1.06292	2.86463	0.0162255	0.622692	-2.86649	0.0538349
	1636879_at	FBgn0038207	CG14356	0.423329	1.54161	2.86132	0.0163194	0.622692	-2.87136	0.0535877
	1629963_at	FBgn0028563	sut1	-0.241889	4.24268	-2.85874	0.0163931	0.622692	-2.87515	0.0533955
	1627371_at	FBgn0033834	CG4744	0.294474	3.66543	2.85792	0.0164165	0.622692	-2.87636	0.0533348
	1634651_at	FBgn0053530	Acp53C14c	0.28067	6.85545	2.85739	0.0164315	0.622692	-2.87713	0.0532958
	1623528_a_at	FBgn0051784	CG31784	-0.251034	-0.0619579	-2.85645	0.0164585	0.622692	-2.87851	0.053226
	1625181_at	FBgn0030830	CG5172	0.287569	0.468476	2.85637	0.016461	0.622692	-2.87864	0.0532196
	1630302_at	FBgn0035779	CG8562	0.39954	5.53355	2.85112	0.0166122	0.627161	-2.88635	0.0528325
	1640147_at	FBgn0028900	CG18518	0.250213	2.71542	2.84596	0.0167625	0.629131	-2.89394	0.0524538
	1632600_at	FBgn0085261	CG34232	-0.39938	2.73022	-2.84367	0.0168297	0.629131	-2.89731	0.0522866
	1641746_at	FBgn0030398	Cpr11B	-0.21993	0.0977769	-2.84363	0.0168308	0.629131	-2.89737	0.0522838
	1632815_at	FBgn0030701	CG16952	0.221917	2.88275	2.84192	0.0168811	0.629131	-2.89988	0.0521593
	1638452_at	FBgn0003068	per	0.367019	0.635272	2.83943	0.0169545	0.629131	-2.90354	0.0519789
	1636906_s_at	FBgn0033785	Sans	-0.257147	0.652609	-2.83907	0.0169653	0.629131	-2.90408	0.0519525
	1623490_at	FBgn0004449	Ten-m	0.252367	4.69017	2.83873	0.0169754	0.629131	-2.90458	0.0519276
	1630019_s_at	FBgn0262624	Tmhs	-0.271919	0.773224	-2.83591	0.017059	0.629131	-2.90872	0.0517241
	1638636_at	FBgn0031703	CG12512	-0.257181	4.27624	-2.83576	0.0170634	0.629131	-2.90894	0.0517134
	1626554_at	FBgn0261552	ps	0.241538	4.30238	2.83511	0.0170827	0.629131	-2.90989	0.0516667
	1627986_s_at	FBgn0033327	PGRP-SC1b	0.309877	4.26431	2.83499	0.0170863	0.629131	-2.91007	0.0516581
	1627986_s_at	FBgn0043576	PGRP-SC1a	0.309877	4.26431	2.83499	0.0170863	0.629131	-2.91007	0.0516581
	1634218_at	FBgn0038828	CG17270	0.247433	1.45426	2.83473	0.0170942	0.629131	-2.91046	0.0516389
	1637350_at	FBgn0051086	CG31086	-0.340122	3.92371	-2.83313	0.0171419	0.629131	-2.91281	0.051524
	1637350_at	FBgn0051323	CG31323	-0.340122	3.92371	-2.83313	0.0171419	0.629131	-2.91281	0.051524
	1633211_a_at	FBgn0262598	mtsh	0.284015	2.41776	2.83288	0.0171496	0.629131	-2.91318	0.0515057
	1634245_at	FBgn0259832	CG34229	0.257799	2.35987	2.83187	0.0171798	0.629131	-2.91467	0.0514333
	1625790_at	FBgn0030543	CG11585	0.270698	0.199481	2.83134	0.0171955	0.629131	-2.91544	0.0513956
	1625003_at	FBgn0038874	ETHR	0.248942	0.204832	2.82905	0.0172643	0.629218	-2.9188	0.0512318
	1641651_at	FBgn0003980	Vm26Ab	0.257869	0.395152	2.82601	0.0173562	0.629489	-2.92328	0.0510148
	1636344_at	FBgn0029503	CHORD	0.230223	5.36182	2.82585	0.0173611	0.629489	-2.92352	0.0510033
	1628977_at	FBgn0034763	RYBP	0.258414	1.84525	2.82361	0.017429	0.630372	-2.92681	0.0508442
	1640400_at	FBgn0034290	CG5773	0.297913	5.45941	2.82165	0.0174889	0.631332	-2.9297	0.0507049
	1630171_at	FBgn0039480	Cpr97Ea	0.288038	1.52323	2.81982	0.0175446	0.632078	-2.93238	0.0505759
	1641582_at	FBgn0034279	CG18635	-0.225025	0.271987	-2.81879	0.0175762	0.632078	-2.9339	0.0505031
	1631626_at	FBgn0000146	aub	0.261618	0.809804	2.81588	0.0176658	0.632469	-2.93818	0.0502979
	1632819_at	FBgn0051224	CG31224	0.318146	3.61053	2.80929	0.0178702	0.632469	-2.94788	0.0498369
	1638006_at	FBgn0032685	CG10211	0.293885	1.41463	2.80701	0.0179414	0.632469	-2.95123	0.0496784
	1626988_at	FBgn0034179	CG6805	0.278057	3.42226	2.80605	0.0179714	0.632469	-2.95264	0.049612
	1634055_at	FBgn0024956	Mat1	0.264449	2.39918	2.8057	0.0179822	0.632469	-2.95314	0.0495881
	1635379_at	FBgn0051300	CG31300	-0.250596	4.59636	-2.80455	0.0180184	0.632469	-2.95484	0.0495083
	1634826_at	FBgn0033863	CG13337	0.250561	4.90502	2.80402	0.018035	0.632469	-2.95562	0.0494717
	1636443_s_at	FBgn0052423	shep	-0.276471	0.875951	-2.80144	0.0181165	0.632469	-2.95942	0.0492934
	1623903_at	FBgn0037683	CG18473	0.28122	3.47461	2.80138	0.0181183	0.632469	-2.9595	0.0492895
	1632739_at	FBgn0052536	CG32536	0.264185	0.659125	2.80103	0.0181293	0.632469	-2.96001	0.0492655
	1632739_at	FBgn0052537	CG32537	0.264185	0.659125	2.80103	0.0181293	0.632469	-2.96001	0.0492655
	1634750_at	FBgn0054033	CG34033	-0.275517	5.76619	-2.79873	0.0182025	0.632469	-2.96341	0.0491067
	1636245_at	FBgn0004359	T48	0.246406	2.60657	2.79673	0.0182659	0.632469	-2.96634	0.0489701
	1629007_at	FBgn0030688	CG8952	-0.311356	5.05954	-2.79602	0.0182885	0.632469	-2.96738	0.0489215
	1625806_at	FBgn0003134	Pp1alpha-96A	0.245937	5.74909	2.79593	0.0182914	0.632469	-2.96751	0.0489153
	1638276_at	FBgn0034471	Obp56e	0.31293	6.02647	2.79544	0.0183072	0.632469	-2.96824	0.0488815
	1636311_at	FBgn0001128	Gpdh1	0.250167	8.03106	2.79494	0.0183232	0.632469	-2.96898	0.0488472
	1634162_at	FBgn0058198	CG40198	0.278383	3.16962	2.79265	0.0183965	0.632469	-2.97234	0.0486912
	1638884_at	FBgn0031384	CG4238	-0.28432	1.22775	-2.79256	0.0183994	0.632469	-2.97247	0.048685
	1626111_at	FBgn0037254	CG14651	0.256518	1.7888	2.79202	0.0184166	0.632469	-2.97326	0.0486484
	1630447_at	FBgn0023524	CG3078	-0.27806	1.72106	-2.79079	0.0184564	0.632469	-2.97508	0.0485645
	1640458_at	FBgn0033067	CG11211	0.48822	4.4186	2.78927	0.0185053	0.632469	-2.97731	0.0484615
	1631205_a_at	FBgn0086254	CG6084	0.239362	8.45544	2.78832	0.0185361	0.632469	-2.97871	0.048397
	1627809_at	FBgn0033827	CG17047	-0.269001	0.053415	-2.78804	0.018545	0.632469	-2.97912	0.0483784
	1632802_at	FBgn0028424	JhI-26	-0.237989	5.11751	-2.78553	0.0186264	0.632469	-2.98281	0.0482086
	1631590_at	FBgn0035040	CG4741	0.263311	1.55875	2.78386	0.018681	0.632469	-2.98528	0.0480955
	1636251_at	FBgn0031850	Tsp	0.213164	2.28629	2.78288	0.0187129	0.632469	-2.98671	0.0480297
	1637911_at	FBgn0030122	Aladin	0.329032	1.03301	2.78216	0.0187365	0.632469	-2.98778	0.0479812
	1641357_at	FBgn0033744	Dh44-R2	0.242015	3.64022	2.78211	0.0187381	0.632469	-2.98785	0.0479779
	1639532_at	FBgn0038943	CG5391	0.278478	1.56313	2.78186	0.0187461	0.632469	-2.98821	0.0479615
	1639610_at	FBgn0037675	HP1e	0.417608	2.31626	2.77977	0.0188146	0.632469	-2.99128	0.0478214
	1641117_a_at	FBgn0031195	CG17600	0.598115	2.68707	2.77777	0.0188805	0.632469	-2.99423	0.0476873
	1636702_at	FBgn0030029	CG15343	0.23644	1.83864	2.77499	0.0189724	0.632469	-2.99832	0.0475019
	1636051_at	FBgn0037176	CG14456	0.332791	2.2633	2.77379	0.019012	0.632469	-3.00007	0.0474225
	1641234_at	FBgn0263235	Phae2	-0.285234	5.00101	-2.77358	0.0190191	0.632469	-3.00039	0.0474082
	1628763_at	FBgn0261985	Ptpmeg	0.284003	5.19164	2.77339	0.0190253	0.632469	-3.00066	0.0473959
	1633726_s_at	FBgn0036851	CG14082	0.276834	0.611564	2.77231	0.0190614	0.632469	-3.00226	0.0473238
	1629520_at	FBgn0028920	CG8997	-0.24071	8.58532	-2.77176	0.0190796	0.632469	-3.00307	0.0472876
	1631140_at	FBgn0052670	Rab9Fb	0.374704	1.87382	2.77088	0.019109	0.632469	-3.00437	0.0472291
	1624262_at	FBgn0013725	phyl	0.339008	2.9754	2.76867	0.0191826	0.632469	-3.0076	0.0470836
	1631543_at	FBgn0027500	spd-2	0.234132	2.55445	2.76756	0.0192198	0.632469	-3.00924	0.0470103
	1634434_at	FBgn0037773	CG5359	0.376656	0.69426	2.76717	0.0192329	0.632469	-3.00981	0.0469847
	1627530_at	FBgn0032305	CG6700	0.237428	4.60738	2.76582	0.0192782	0.632469	-3.01179	0.046896
	1625153_at	FBgn0051352	Unc-115a	-0.55858	1.22704	-2.76438	0.019327	0.632469	-3.01392	0.0468009
	1625153_at	FBgn0053105	p24-2	-0.55858	1.22704	-2.76438	0.019327	0.632469	-3.01392	0.0468009
	1625153_at	FBgn0260463	Unc-115b	-0.55858	1.22704	-2.76438	0.019327	0.632469	-3.01392	0.0468009
	1622913_a_at	FBgn0034789	PIP5K59B	0.301929	0.295249	2.76207	0.0194048	0.632469	-3.01731	0.04665
	1628978_at	FBgn0261786	mi	0.29758	1.79741	2.7577	0.0195536	0.632469	-3.02374	0.0463647
	1632085_at	FBgn0050095	CG30095	-0.319	0.149681	-2.75734	0.0195657	0.632469	-3.02427	0.0463415
	1631304_a_at	FBgn0033401	CG1968	0.21738	2.95073	2.75695	0.0195792	0.632469	-3.02485	0.0463159
	1626141_at	FBgn0054027	CG34027	-0.220629	0.410855	-2.75674	0.0195864	0.632469	-3.02516	0.0463022
	1639992_at	FBgn0067629	CG33332	0.229223	0.868789	2.75561	0.0196251	0.632469	-3.02682	0.0462289
	1630967_at	FBgn0032039	CG13385	-0.238226	3.94442	-2.75475	0.0196545	0.632469	-3.02808	0.0461732
	1635500_a_at	FBgn0004595	pros	0.280778	3.89729	2.75435	0.0196682	0.632469	-3.02867	0.0461475
	1630935_at	FBgn0033194	Vps13	0.210315	4.54494	2.7532	0.0197076	0.632469	-3.03035	0.0460734
	1623821_at	FBgn0035257	CG12011	0.384454	0.891032	2.75297	0.0197154	0.632469	-3.03069	0.0460586
	1630679_at	FBgn0259101	CG42249	-0.219193	4.84403	-2.75261	0.019728	0.632469	-3.03122	0.046035
	1629405_s_at	FBgn0026083	tyf	-0.254922	2.44153	-2.75248	0.0197324	0.632469	-3.03141	0.0460267
	1629178_at	FBgn0050181	ppk3	0.242048	0.0660053	2.75216	0.0197435	0.632469	-3.03189	0.046006
	1629178_at	FBgn0050181	ppk3	0.242048	0.0660053	2.75216	0.0197435	0.632469	-3.03189	0.046006
	1638070_at	FBgn0036277	CG10418	0.255016	3.40199	2.75125	0.0197747	0.632469	-3.03322	0.0459476
	1635246_at	FBgn0020391	Nrk	-0.343364	0.297776	-2.75072	0.019793	0.632469	-3.034	0.0459135
	1631392_at	FBgn0039241	CG11089	0.237188	6.98929	2.74985	0.0198231	0.632469	-3.03528	0.0458575
	1631392_at	FBgn0043799	CG31381	0.237188	6.98929	2.74985	0.0198231	0.632469	-3.03528	0.0458575
	1629565_s_at	FBgn0042086	Tsp42Eb	-0.35007	4.31466	-2.74872	0.0198625	0.632661	-3.03695	0.0457843
	1629565_s_at	FBgn0050160	CG30160	-0.35007	4.31466	-2.74872	0.0198625	0.632661	-3.03695	0.0457843
	1639036_at	FBgn0033699	RpS11	0.471484	2.74976	2.74436	0.020014	0.634502	-3.04335	0.0455054
	1634158_at	FBgn0039154	Npc2f	-0.242484	5.08847	-2.74413	0.0200222	0.634502	-3.0437	0.0454904
	1640630_at	FBgn0039045	CG17119	-0.240964	0.0124817	-2.74346	0.0200454	0.634502	-3.04467	0.0454481
	1639853_at	FBgn0038252	BigH1	0.385394	2.21829	2.74153	0.0201131	0.634502	-3.04751	0.045325
	1639853_at	FBgn0038252	BigH1	0.385394	2.21829	2.74153	0.0201131	0.634502	-3.04751	0.045325
	1625201_s_at	FBgn0046225	CG17230	0.265901	4.77692	2.74121	0.0201243	0.634502	-3.04798	0.0453048
	1623485_at	FBgn0004832	Xpac	0.214064	2.27048	2.73932	0.0201908	0.634502	-3.05076	0.0451847
	1641053_s_at	FBgn0004885	tok	0.269133	4.22903	2.73742	0.020258	0.634502	-3.05356	0.045064
	1637079_at	FBgn0034300	CG5098	0.42448	3.36237	2.73738	0.0202592	0.634502	-3.05361	0.0450618
	1639947_s_at	FBgn0033166	Eaf	0.244514	3.53471	2.7352	0.0203366	0.634502	-3.05682	0.0449239
	1632024_at	FBgn0043457	CG5180	-0.354608	1.75986	-2.73296	0.020416	0.634502	-3.06011	0.0447832
	1635761_at	FBgn0005642	wdn	0.213192	2.40297	2.73292	0.0204178	0.634502	-3.06018	0.0447801
	1633026_a_at	FBgn0051158	Efa6	0.244963	3.85694	2.73284	0.0204205	0.634502	-3.06029	0.0447753
	1641028_at	FBgn0053988	Mid1	0.336181	1.63263	2.73263	0.0204279	0.634502	-3.0606	0.0447622
	1641028_at	FBgn0053988	Mid1	0.336181	1.63263	2.73263	0.0204279	0.634502	-3.0606	0.0447622
	1625164_at	FBgn0044810	TotX	0.535924	5.98347	2.73168	0.020462	0.634502	-3.062	0.0447021
	1633548_at	FBgn0264342	CG43798	-0.247655	1.62823	-2.73153	0.0204673	0.634502	-3.06222	0.0446928
	1623426_at	FBgn0051633	CG31633	0.214522	3.39536	2.73019	0.0205152	0.634502	-3.06419	0.0446088
	1631604_at	FBgn0259715	CG42369	-0.360358	5.89547	-2.72821	0.0205861	0.634502	-3.0671	0.0444851
	1627698_at	FBgn0010531	Ccs	-0.23255	0.330966	-2.72775	0.0206027	0.634502	-3.06777	0.0444564
	1631452_at	FBgn0032945	CG8665	0.233108	0.693434	2.72718	0.0206233	0.634502	-3.06862	0.0444205
	1638742_at	FBgn0036110	Cpr67Fb	-0.760701	3.4696	-2.72609	0.0206625	0.634502	-3.07022	0.0443527
	1630097_s_at	FBgn0028394	CG17834	-0.327953	1.82354	-2.72604	0.0206643	0.634502	-3.07029	0.0443497
	1630176_at	FBgn0037660	beag	0.233792	1.67421	2.72598	0.0206664	0.634502	-3.07037	0.0443459
	1635976_at	FBgn0035371	AhcyL1	0.226366	3.51282	2.72532	0.0206903	0.634502	-3.07135	0.0443048
	1624603_at	FBgn0036314	Sf3a2	-0.221875	2.94493	-2.72173	0.0208204	0.63746	-3.07663	0.0440818
	1632425_at	FBgn0085331	CG34302	0.285508	0.59285	2.71422	0.0210947	0.641656	-3.08765	0.0436195
	1634359_a_at	FBgn0032105	borr	0.230656	2.93379	2.71398	0.0211039	0.641656	-3.08802	0.0436042
	1639290_at	FBgn0002638	Rcc1	0.229704	0.552408	2.71354	0.0211199	0.641656	-3.08865	0.0435777
	1630887_a_at	FBgn0264693	ens	0.234387	5.5731	2.71301	0.0211394	0.641656	-3.08943	0.0435452
	1628231_at	FBgn0004852	Ac76E	0.251936	4.11917	2.71152	0.0211944	0.641656	-3.09162	0.0434542
	1625954_at	FBgn0024997	CG2681	-0.383874	2.49889	-2.70832	0.0213131	0.643193	-3.09632	0.0432592
	1624054_at	FBgn0036752	Adgf-A	-0.30738	3.56321	-2.70609	0.0213963	0.643351	-3.09961	0.0431235
	1628226_at	FBgn0035791	CG8539	0.419366	1.32818	2.70571	0.0214105	0.643351	-3.10016	0.0431005
	1631835_at	FBgn0038730	CG6300	0.327555	0.906775	2.70498	0.0214377	0.643351	-3.10124	0.0430563
	1623883_at	FBgn0040964	CG18661	-0.311551	1.72103	-2.70447	0.021457	0.643351	-3.10199	0.0430252
	1627132_at	FBgn0034379	CG15073	0.281887	1.72201	2.70169	0.0215612	0.643351	-3.10607	0.0428576
	1638275_at	FBgn0030311	CG11699	0.266029	5.04815	2.70138	0.0215728	0.643351	-3.10652	0.042839
	1626483_at	FBgn0001108	DCTN1-p150	0.251934	3.30868	2.7009	0.0215909	0.643351	-3.10723	0.0428099
	1633904_at	FBgn0263289	scrib	0.20964	4.81164	2.69936	0.021649	0.643351	-3.10949	0.0427173
	1626421_at	FBgn0038735	CG4662	0.222325	0.8518	2.69904	0.0216611	0.643351	-3.10996	0.0426981
	1641596_at	FBgn0032751	CG17343	0.223842	0.905763	2.69903	0.0216616	0.643351	-3.10998	0.0426974
	1627233_at	FBgn0264598	PsGEF	0.359832	0.65547	2.69749	0.0217197	0.643351	-3.11224	0.0426052
	1632474_at	FBgn0052755	CG32755	0.24069	0.672584	2.69734	0.0217256	0.643351	-3.11247	0.0425958
	1629944_at	FBgn0037796	CG12814	0.249054	3.84864	2.69533	0.0218018	0.644598	-3.11541	0.0424759
	1636885_at	FBgn0038450	CG17560	-0.343265	5.96039	-2.69297	0.021892	0.645945	-3.11889	0.0423347
	1634398_a_at	FBgn0260632	dl	0.242131	1.67253	2.6923	0.0219174	0.645945	-3.11987	0.0422951
	1623805_at	FBgn0030801	Rcp	-0.256971	0.880257	-2.69118	0.0219601	0.645945	-3.12151	0.0422287
	1623805_at	FBgn0033352	PAN2	-0.256971	0.880257	-2.69118	0.0219601	0.645945	-3.12151	0.0422287
	1633852_at	FBgn0086675	fne	0.233509	4.55384	2.68898	0.0220448	0.646186	-3.12475	0.0420978
	1626842_a_at	FBgn0013576	mtd	0.302295	3.33967	2.68813	0.0220775	0.646186	-3.126	0.0420476
	1628594_at	FBgn0003301	rut	0.246686	1.74185	2.6867	0.0221325	0.646186	-3.12809	0.0419633
	1629607_at	FBgn0030915	CG6179	0.27764	2.66478	2.68659	0.0221368	0.646186	-3.12826	0.0419567
	1624269_at	FBgn0260817	gkt	-0.286349	0.417098	-2.68593	0.0221623	0.646186	-3.12923	0.0419177
	1635057_s_at	FBgn0031161	CG15445	0.205561	3.8779	2.68101	0.0223535	0.64958	-3.13645	0.0416283
	1624285_at	FBgn0036015	CG3088	0.308186	5.74999	2.68	0.0223926	0.64958	-3.13793	0.0415695
	1632690_a_at	FBgn0036592	CG13049	0.241505	1.50261	2.6791	0.0224278	0.64958	-3.13925	0.0415169
	1627129_at	FBgn0000253	Cam	0.233793	6.17195	2.67883	0.0224385	0.64958	-3.13965	0.0415009
	1628613_a_at	FBgn0263077	CG43340	0.240882	4.31339	2.67648	0.0225306	0.64958	-3.1431	0.041364
	1626618_at	FBgn0085371	CG34342	0.217883	0.223826	2.6764	0.0225339	0.64958	-3.14322	0.0413592
	1630740_at	FBgn0034663	CG4363	-0.215195	7.9814	-2.67592	0.022553	0.64958	-3.14394	0.0413309
	1634409_at	FBgn0028537	CG31775	0.7082	3.63618	2.67258	0.0226845	0.652377	-3.14883	0.0411374
	1634409_at	FBgn0260954	CG42586	0.7082	3.63618	2.67258	0.0226845	0.652377	-3.14883	0.0411374
	1637792_at	FBgn0028550	Atf3	0.284334	3.7215	2.67048	0.0227678	0.652943	-3.15192	0.0410158
	1628802_at	FBgn0052554	CG32554	0.21327	0.589557	2.6695	0.0228066	0.652943	-3.15335	0.0409595
	1628094_at	FBgn0038029	GstD11	0.308459	0.844583	2.66794	0.022869	0.652943	-3.15565	0.0408693
	1633709_at	FBgn0031533	CG2772	-0.431631	1.34823	-2.66535	0.0229724	0.652943	-3.15944	0.0407207
	1627436_s_at	FBgn0016694	Pdp1	0.312581	4.97406	2.66489	0.022991	0.652943	-3.16013	0.040694
	1634980_s_at	FBgn0261553	CG42671	0.297884	4.01433	2.66391	0.0230302	0.652943	-3.16156	0.0406381
	1630407_at	FBgn0031164	CG1724	-0.289638	3.54188	-2.66356	0.0230444	0.652943	-3.16208	0.0406179
	1624796_at	FBgn0028491	CG2930	-0.254807	0.265147	-2.66325	0.0230569	0.652943	-3.16254	0.0406002
	1641201_at	FBgn0034154	CG5267	-0.22171	3.46066	-2.6605	0.0231677	0.652943	-3.16657	0.0404432
	1638302_a_at	FBgn0037238	CG1090	0.291959	1.26673	2.65983	0.0231946	0.652943	-3.16755	0.0404054
	1638100_s_at	FBgn0261985	Ptpmeg	0.228944	4.22538	2.65939	0.0232125	0.652943	-3.1682	0.0403802
	1624020_at	FBgn0002781	mod(mdg4)	-0.279801	0.777969	-2.65524	0.0233813	0.652943	-3.17429	0.0401446
	1625937_at	FBgn0265597	rad	0.216234	0.590187	2.65502	0.0233903	0.652943	-3.17462	0.0401321
	1625937_at	FBgn0265597	rad	0.216234	0.590187	2.65502	0.0233903	0.652943	-3.17462	0.0401321
	1630359_at	FBgn0051810	CG31810	-0.415747	4.65782	-2.65353	0.0234513	0.652943	-3.17681	0.0400478
	1639596_at	FBgn0032021	CG7781	0.225648	5.40081	2.65234	0.0234997	0.652943	-3.17855	0.0399811
	1625283_at	FBgn0002781	mod(mdg4)	0.225967	0.192917	2.652	0.0235139	0.652943	-3.17906	0.0399615
	1625129_at	FBgn0033216	CG1946	-0.389943	2.38683	-2.65156	0.0235318	0.652943	-3.17969	0.039937
	1630476_s_at	FBgn0034797	nahoda	0.207702	4.83691	2.65148	0.0235353	0.652943	-3.17982	0.0399322
	1635527_at	FBgn0039356	CG5039	-0.231854	1.66458	-2.65005	0.023594	0.652943	-3.18192	0.039852
	1630975_at	FBgn0030189	CG2909	0.265811	2.65111	2.64837	0.0236633	0.652943	-3.18438	0.0397577
	1630249_at	FBgn0250757	CG42235	0.252327	2.46505	2.64588	0.023766	0.652943	-3.18803	0.0396187
	1630738_s_at	FBgn0026379	Pten	0.213527	1.7462	2.64563	0.0237765	0.652943	-3.1884	0.0396046
	1638464_a_at	FBgn0028572	qtc	0.205516	5.64165	2.6453	0.0237903	0.652943	-3.18889	0.039586
	1640595_at	FBgn0036514	CG12301	0.249486	1.22117	2.645	0.0238027	0.652943	-3.18933	0.0395694
	1627460_at	FBgn0033683	CG18343	-0.21069	6.23992	-2.64481	0.0238105	0.652943	-3.1896	0.0395589
	1626520_at	FBgn0025808	Rad17	0.271444	0.39586	2.64474	0.0238133	0.652943	-3.1897	0.0395552
	1632850_at	FBgn0037073	Tsr1	-0.270215	2.48309	-2.64455	0.0238212	0.652943	-3.18998	0.0395446
	1635909_at	FBgn0262582	cic	0.247208	3.21533	2.64435	0.0238296	0.652943	-3.19028	0.0395333
	1625059_at	FBgn0028418	Lk	0.272108	1.35358	2.64416	0.0238373	0.652943	-3.19055	0.0395229
	1638040_at	FBgn0004647	N	0.34148	2.04921	2.6433	0.0238735	0.652943	-3.19183	0.0394745
	1629163_at	FBgn0029751	CG17764	0.222574	4.08793	2.6432	0.0238774	0.652943	-3.19196	0.0394692
	1638299_at	FBgn0261556	CG42674	0.279936	1.47457	2.64195	0.0239296	0.652943	-3.1938	0.0393997
	1639863_at	FBgn0039784	CG9698	0.310017	0.377016	2.64188	0.0239323	0.652943	-3.1939	0.039396
	1633770_at	FBgn0037646	CAHbeta	0.26416	3.77774	2.64117	0.0239619	0.652943	-3.19494	0.0393567
	1626182_a_at	FBgn0035945	CG5026	0.272611	2.5049	2.63995	0.0240134	0.652943	-3.19674	0.0392886
	1628105_a_at	FBgn0003149	Prm	0.228164	8.6428	2.63696	0.0241387	0.655322	-3.20112	0.0391236
	1631524_a_at	FBgn0001235	hth	0.225388	3.05685	2.6354	0.0242046	0.655322	-3.20341	0.0390375
	1640607_at	FBgn0021767	org-1	0.339816	0.416969	2.63454	0.0242407	0.655363	-3.20467	0.0389905
	1633987_at	FBgn0031428	CG9886	0.234543	0.0691819	2.63337	0.0242905	0.655534	-3.2064	0.0389258
	1627487_at	FBgn0085408	Shroom	0.216229	0.266117	2.63276	0.0243162	0.655534	-3.20728	0.0388925
	1627054_at	FBgn0003016	osp	0.232216	4.46825	2.6306	0.0244077	0.655603	-3.21044	0.0387745
	1633304_at	FBgn0030341	p24-1	0.204858	4.67732	2.63037	0.0244179	0.655603	-3.21079	0.0387615
	1629445_at	FBgn0010431	mtrm	0.258115	0.788014	2.63026	0.0244225	0.655603	-3.21096	0.0387555
	1638053_at	FBgn0015037	Cyp4p1	0.336208	4.95893	2.62694	0.0245642	0.657394	-3.21582	0.0385747
	1638313_at	FBgn0033677	CG8321	-0.244385	4.50566	-2.62512	0.0246424	0.657394	-3.21849	0.0384756
	1625511_at	FBgn0085412	CG34383	0.418273	2.45429	2.62463	0.0246634	0.657394	-3.21921	0.0384492
	1626240_s_at	FBgn0038318	CG6236	-0.292051	1.39852	-2.62461	0.0246642	0.657394	-3.21924	0.0384482
	1625672_s_at	FBgn0262109	lncRNA:CR42862	0.2297	5.76619	2.62445	0.0246712	0.657394	-3.21948	0.0384393
	1633288_at	FBgn0262475	bru2	-0.2663	0.749889	-2.62384	0.0246974	0.657394	-3.22037	0.0384064
	1628330_at	FBgn0083952	CG34116	-0.218562	0.364984	-2.6216	0.0247939	0.65816	-3.22365	0.0382854
	1633092_at	FBgn0000392	cup	0.224505	6.51971	2.62156	0.0247956	0.65816	-3.22371	0.0382833
	1633092_at	FBgn0085339	CG34310	0.224505	6.51971	2.62156	0.0247956	0.65816	-3.22371	0.0382833
	1636140_at	FBgn0031598	Vps53	0.198045	1.56739	2.62063	0.0248359	0.65818	-3.22507	0.038233
	1629943_at	FBgn0035879	GAPcenA	0.36743	2.74244	2.61967	0.0248774	0.65818	-3.22648	0.0381815
	1632232_at	FBgn0262854	CG43218	-0.259475	2.91657	-2.61903	0.0249054	0.65818	-3.22742	0.0381467
	1633432_at	FBgn0029950	CG9657	0.428202	2.3455	2.61834	0.0249353	0.65818	-3.22843	0.0381097
	1639147_s_at	FBgn0050438	CG30438	0.281623	6.43013	2.6152	0.0250723	0.659924	-3.23304	0.0379411
	1639341_at	FBgn0035449	CG14971	0.213835	3.94251	2.61443	0.0251058	0.659924	-3.23416	0.0379001
	1638576_at	FBgn0032634	Rpb11	0.254105	3.01575	2.61346	0.0251482	0.660123	-3.23558	0.0378484
	1627260_at	FBgn0037570	CG11693	0.241909	0.210953	2.61198	0.0252132	0.660297	-3.23775	0.0377695
	1638014_at	FBgn0027617	CG5808	-0.204453	0.534604	-2.611	0.0252567	0.660297	-3.2392	0.0377169
	1628499_at	FBgn0038510	CG14331	-0.211733	0.15974	-2.61093	0.0252593	0.660297	-3.23929	0.0377136
	1629391_at	FBgn0040093	lectin-46Ca	-0.262302	5.35536	-2.60772	0.0254011	0.663087	-3.244	0.0375432
	1639189_at	FBgn0033984	Lap1	0.298718	1.06762	2.60632	0.0254633	0.663609	-3.24605	0.0374689
	1641539_a_at	FBgn0039703	CG7829	0.283762	2.22045	2.60546	0.0255016	0.663609	-3.24732	0.0374235
	1624132_at	FBgn0035980	mRRF1	-0.352321	2.27154	-2.60491	0.0255261	0.663609	-3.24813	0.0373943
	1625022_a_at	FBgn0038337	CG6125	-0.229624	5.19121	-2.60002	0.0257446	0.66631	-3.25529	0.0371372
	1641542_at	FBgn0027279	l(1)G0196	0.301122	2.0654	2.59999	0.025746	0.66631	-3.25534	0.0371356
	1641152_at	FBgn0031170	ABCA	0.248561	3.32392	2.59876	0.0258011	0.66631	-3.25713	0.0370714
	1625640_a_at	FBgn0039465	Tsp97E	0.223563	4.4543	2.59866	0.0258058	0.66631	-3.25729	0.0370659
	1631173_at	FBgn0030607	dob	0.268432	2.8368	2.59694	0.0258829	0.667392	-3.2598	0.0369765
	1626801_at	FBgn0036290	CG10638	0.228444	4.11219	2.59564	0.0259418	0.668002	-3.26171	0.0369085
	1633512_at	FBgn0019650	toy	0.235577	3.0434	2.59453	0.0259919	0.668384	-3.26333	0.0368508
	1634373_a_at	FBgn0034662	CG13492	-0.248396	4.28963	-2.59271	0.0260747	0.669604	-3.266	0.0367561
	1633313_at	FBgn0261788	Ank2	0.301268	6.7495	2.5916	0.0261252	0.669993	-3.26763	0.0366986
	1637960_at	FBgn0038219	CG14839	0.278146	3.18204	2.58933	0.0262287	0.670832	-3.27095	0.0365812
	1636449_at	FBgn0052984	CG32984	0.299905	0.739314	2.58604	0.0263797	0.672497	-3.27578	0.0364116
	1632814_at	FBgn0003114	plu	0.270261	0.255766	2.58431	0.0264592	0.672497	-3.27831	0.0363229
	1626642_at	FBgn0035922	Pex7	0.223015	0.187607	2.58408	0.0264699	0.672497	-3.27865	0.036311
	1631291_at	FBgn0262579	Ect4	0.293809	2.72743	2.58369	0.0264879	0.672497	-3.27922	0.0362911
	1637195_at	FBgn0051321	CG31321	0.276448	3.01868	2.58338	0.026502	0.672497	-3.27966	0.0362755
	1641623_at	FBgn0034199	Gbp1	0.244062	4.88945	2.58215	0.0265588	0.672497	-3.28147	0.0362125
	1629566_at	FBgn0033733	CG8834	-0.237656	6.17805	-2.5819	0.0265703	0.672497	-3.28183	0.0361998
	1635601_at	FBgn0259237	CG42335	-0.232853	0.450235	-2.58174	0.0265777	0.672497	-3.28206	0.0361917
	1632870_at	FBgn0052364	tut	0.320586	1.33073	2.58032	0.0266435	0.67253	-3.28414	0.0361192
	1634140_a_at	FBgn0039927	CG11155	0.295382	2.48379	2.57854	0.0267266	0.67253	-3.28676	0.0360283
	1631281_a_at	FBgn0000075	amd	0.210344	0.399775	2.57746	0.0267766	0.67253	-3.28833	0.0359737
	1635469_at	FBgn0037560	CR18228	-0.282042	4.43902	-2.57684	0.0268059	0.67253	-3.28925	0.0359419
	1634012_at	FBgn0034275	CG5002	0.223005	4.10408	2.5737	0.0269529	0.67253	-3.29384	0.035783
	1634890_at	FBgn0086691	UK114	0.256964	7.05968	2.57302	0.0269849	0.67253	-3.29484	0.0357486
	1637229_a_at	FBgn0036992	Hpd	0.283609	6.74652	2.57301	0.0269852	0.67253	-3.29485	0.0357483
	1627873_at	FBgn0038046	CG5641	0.223127	3.29993	2.57286	0.0269921	0.67253	-3.29507	0.0357408
	1632791_at	FBgn0052479	Usp10	0.206262	4.37671	2.57247	0.0270107	0.67253	-3.29564	0.035721
	1633991_at	FBgn0051445	CG31445	0.264004	3.9043	2.57198	0.0270338	0.67253	-3.29636	0.0356962
	1629708_at	FBgn0035693	CG8219	0.277228	3.28085	2.57193	0.0270362	0.67253	-3.29644	0.0356936
	1623050_at	FBgn0022740	HLH54F	0.295848	0.402621	2.57107	0.0270764	0.67253	-3.29768	0.0356507
	1623418_at	FBgn0022800	Cad96Ca	0.322778	2.77353	2.57081	0.027089	0.67253	-3.29808	0.0356372
	1625242_at	FBgn0051249	CG31249	0.221658	2.66208	2.57062	0.027098	0.67253	-3.29835	0.0356277
	1632384_at	FBgn0028926	NC2beta	0.239667	2.2777	2.56974	0.0271392	0.67253	-3.29963	0.0355838
	1631765_at	FBgn0243512	puc	0.222421	4.00965	2.56673	0.0272821	0.674115	-3.30405	0.0354327
	1639273_s_at	FBgn0016076	vri	-0.197957	3.75558	-2.56599	0.0273174	0.674115	-3.30513	0.0353955
	1632076_a_at	FBgn0036952	CG6933	0.239258	0.0943318	2.56211	0.0275024	0.675227	-3.3108	0.0352025
	1627937_at	FBgn0052413	CG32413	0.266658	1.21035	2.56182	0.0275162	0.675227	-3.31122	0.0351882
	1637742_at	FBgn0261055	Sfp26Ad	0.322035	7.87871	2.56131	0.0275407	0.675227	-3.31197	0.0351628
	1641475_at	FBgn0028400	Syt4	0.245388	4.88599	2.55975	0.0276158	0.675587	-3.31426	0.0350853
	1631727_at	FBgn0053121	Spn28Db	0.240345	1.41781	2.55938	0.0276337	0.675587	-3.3148	0.0350669
	1627462_a_at	FBgn0038735	CG4662	0.280787	4.60289	2.55845	0.0276785	0.675587	-3.31616	0.0350208
	1624190_at	FBgn0051637	CG31637	0.278724	4.58583	2.55805	0.0276979	0.675587	-3.31675	0.0350009
	1632494_at	FBgn0026432	Grip163	-0.200832	0.222442	-2.55189	0.0279964	0.681189	-3.32576	0.0346981
	1637119_at	FBgn0028931	CG16863	0.247279	0.250487	2.55183	0.0279995	0.681189	-3.32585	0.034695
	1633434_at	FBgn0033904	CG18327	-0.214227	3.06871	-2.55098	0.0280411	0.681326	-3.32709	0.0346533
	1638558_a_at	FBgn0011288	Snap25	0.303317	6.0303	2.54863	0.028156	0.682423	-3.33053	0.0345385
	1640866_at	FBgn0036459	CG3349	-0.216513	-0.0832834	-2.54782	0.0281954	0.682423	-3.3317	0.0344994
	1629819_s_at	FBgn0011260	Sema2a	0.2775	4.43152	2.54691	0.0282401	0.682423	-3.33303	0.0344552
	1632361_at	FBgn0031814	retm	0.237874	5.01964	2.54603	0.0282834	0.682423	-3.33432	0.0344124
	1630669_at	FBgn0032282	CG7299	0.267579	2.08869	2.54511	0.0283291	0.682423	-3.33568	0.0343673
	1629209_at	FBgn0038183	CG9286	-0.259027	1.59011	-2.54379	0.0283943	0.682423	-3.33761	0.0343033
	1631242_at	FBgn0015396	jumu	-0.213559	0.196124	-2.54188	0.0284888	0.682423	-3.3404	0.034211
	1624745_at	FBgn0044048	Ilp5	0.28972	1.84894	2.54136	0.0285144	0.682423	-3.34115	0.0341861
	1628948_a_at	FBgn0030581	CG14408	0.272938	1.735	2.53965	0.0285995	0.682423	-3.34365	0.0341036
	1630552_at	FBgn0263512	Vsx2	-0.201275	0.589942	-2.53954	0.028605	0.682423	-3.34382	0.0340982
	1623133_a_at	FBgn0037060	CG10508	0.208662	4.54198	2.5389	0.0286367	0.682423	-3.34475	0.0340676
	1633334_at	FBgn0035308	CG15822	-0.256754	1.68879	-2.53634	0.0287647	0.682423	-3.34849	0.0339446
	1633649_s_at	FBgn0005614	trpl	-0.203826	4.76161	-2.53626	0.0287686	0.682423	-3.34861	0.0339409
	1628005_at	FBgn0086758	chinmo	0.337374	2.59082	2.53595	0.0287841	0.682423	-3.34906	0.0339261
	1637918_s_at	FBgn0034974	CG16786	0.218498	0.580514	2.53581	0.0287915	0.682423	-3.34927	0.033919
	1625724_at	FBgn0264815	Pde1c	0.231252	2.01777	2.53396	0.028884	0.682423	-3.35197	0.0338309
	1627084_s_at	FBgn0061197	CG13164	0.200665	7.08806	2.53386	0.0288892	0.682423	-3.35212	0.0338259
	1638264_at	FBgn0031141	CG1304	-0.795173	2.84714	-2.53263	0.0289509	0.682423	-3.35391	0.0337674
	1626291_at	FBgn0034499	Cpr56F	-0.282377	1.44078	-2.5306	0.0290537	0.682423	-3.35688	0.0336705
	1633343_at	FBgn0038691	CG5250	0.246927	2.45002	2.53033	0.0290675	0.682423	-3.35728	0.0336575
	1628839_at	FBgn0039050	CG17110	0.244786	2.45365	2.52811	0.0291799	0.682423	-3.36052	0.0335523
	1636105_at	FBgn0035845	CG13675	0.534717	0.483301	2.52765	0.029203	0.682423	-3.36119	0.0335307
	1625237_at	FBgn0039585	CG1894	0.373432	1.95244	2.52765	0.0292031	0.682423	-3.36119	0.0335307
	1639447_at	FBgn0039829	CG15561	0.203299	1.38044	2.52594	0.0292903	0.682423	-3.36369	0.0334497
	1639061_at	FBgn0034975	enok	0.192964	1.34103	2.52556	0.0293098	0.682423	-3.36425	0.0334316
	1636219_at	FBgn0022710	Ac13E	0.205016	3.72584	2.52541	0.0293174	0.682423	-3.36447	0.0334246
	1631645_at	FBgn0266083	ocm	0.245734	1.78603	2.52504	0.029336	0.682423	-3.365	0.0334074
	1631645_at	FBgn0266083	ocm	0.245734	1.78603	2.52504	0.029336	0.682423	-3.365	0.0334074
	1634714_at	FBgn0031114	cactin	0.259228	1.17542	2.52417	0.0293806	0.682423	-3.36627	0.0333662
	1640095_at	FBgn0039194	CG13614	-0.233566	-0.104785	-2.52278	0.0294518	0.682423	-3.36831	0.0333008
	1635446_at	FBgn0030929	CG15043	-0.728082	4.87768	-2.52149	0.0295179	0.682423	-3.37019	0.0332402
	1638973_s_at	FBgn0031732	CG11149	-0.308955	3.50038	-2.52105	0.0295405	0.682423	-3.37083	0.0332196
	1627817_at	FBgn0053109	CG33109	0.251556	4.93658	2.52051	0.0295683	0.682423	-3.37162	0.0331943
	1628138_s_at	FBgn0029525	CG18273	-0.306334	1.11399	-2.52019	0.0295848	0.682423	-3.37209	0.0331792
	1635044_at	FBgn0001225	Hsp26	0.21643	5.56162	2.51739	0.0297293	0.682423	-3.37618	0.0330483
	1636300_at	FBgn0033058	CCHa2-R	0.244959	0.342939	2.51738	0.0297296	0.682423	-3.37619	0.033048
	1636300_at	FBgn0033058	CCHa2-R	0.244959	0.342939	2.51738	0.0297296	0.682423	-3.37619	0.033048
	1634898_a_at	FBgn0027950	MBD-like	0.213355	3.22495	2.51699	0.0297498	0.682423	-3.37676	0.0330298
	1622904_at	FBgn0266757	mfr	0.286414	0.144492	2.5168	0.02976	0.682423	-3.37705	0.0330206
	1635040_a_at	FBgn0261397	didum	0.206265	3.87872	2.51667	0.0297663	0.682423	-3.37722	0.033015
	1625188_at	FBgn0264495	gpp	0.235491	1.26158	2.51596	0.0298031	0.682423	-3.37826	0.0329819
	1639401_at	FBgn0002570	Mal-A1	-0.20505	8.85215	-2.51585	0.0298088	0.682423	-3.37842	0.0329767
	1631803_at	FBgn0002562	Lsp1alpha	0.777682	1.58446	2.51469	0.0298694	0.682423	-3.38012	0.0329224
	1637666_at	FBgn0034567	CG15651	0.336376	1.07038	2.51442	0.0298832	0.682423	-3.38051	0.0329101
	1634572_at	FBgn0034259	P32	0.304312	4.83729	2.51338	0.0299377	0.682423	-3.38204	0.0328615
	1630027_s_at	FBgn0053113	Rtnl1	0.225374	7.93165	2.51306	0.0299539	0.682423	-3.38249	0.032847
	1625953_at	FBgn0036470	EAChm	0.328555	0.609308	2.51197	0.0300109	0.682423	-3.38409	0.0327965
	1632390_at	FBgn0034443	cer	0.217558	6.22822	2.51179	0.0300204	0.682423	-3.38436	0.032788
	1631188_a_at	FBgn0031762	CG9098	-0.772047	1.62375	-2.51172	0.0300241	0.682423	-3.38446	0.0327847
	1636156_at	FBgn0036522	CG7372	-0.216221	0.0810329	-2.5108	0.0300721	0.682423	-3.3858	0.0327423
	1640397_at	FBgn0267336	Glut4EF	0.222194	2.54978	2.51066	0.0300793	0.682423	-3.386	0.0327359
	1631834_at	FBgn0051098	CG31098	0.228101	2.60729	2.51017	0.0301052	0.682423	-3.38672	0.032713
	1628688_at	FBgn0039831	CG12054	0.224229	3.41261	2.5101	0.0301087	0.682423	-3.38682	0.0327099
	1631619_a_at	FBgn0040305	MTF-1	0.25386	3.29265	2.50864	0.0301854	0.682423	-3.38895	0.0326425
	1634637_a_at	FBgn0250837	dUTPase	0.237382	0.952879	2.50816	0.0302107	0.682423	-3.38966	0.0326203
	1623790_at	FBgn0051901	Mur29B	-0.51797	2.88257	-2.50597	0.030326	0.683515	-3.39285	0.0325196
	1637142_at	FBgn0031824	CG9547	0.230553	5.01614	2.50571	0.0303394	0.683515	-3.39322	0.032508
	1634053_at	FBgn0030850	stas	0.2055	5.03914	2.50519	0.0303672	0.683515	-3.39399	0.0324838
	1634053_at	FBgn0030850	stas	0.2055	5.03914	2.50519	0.0303672	0.683515	-3.39399	0.0324838
	1623394_at	FBgn0259145	CG42260	0.26229	0.561298	2.50307	0.030479	0.685217	-3.39707	0.032387
	1626469_at	FBgn0033351	AIMP1	-0.243069	3.29296	-2.50042	0.0306198	0.687567	-3.40094	0.0322661
	1637447_at	FBgn0040356	CG12498	0.275142	2.40384	2.49905	0.0306931	0.688396	-3.40295	0.0322035
	1627293_at	FBgn0029898	CG14439	0.233443	4.51813	2.49693	0.0308064	0.690121	-3.40604	0.0321074
	1623717_at	FBgn0052086	CG32086	0.260177	4.70873	2.49375	0.0309773	0.692906	-3.41068	0.0319634
	1635046_at	FBgn0042179	CG18869	0.210598	4.51924	2.49326	0.0310038	0.692906	-3.41139	0.0319413
	1637351_at	FBgn0031626	CG15631	0.237974	5.62493	2.49015	0.0311715	0.694079	-3.41592	0.0318017
	1624857_at	FBgn0039969	Fis1	0.279908	1.75205	2.4899	0.0311853	0.694079	-3.41629	0.0317902
	1639906_a_at	FBgn0033633	Smyd4-3	0.208954	1.24526	2.48934	0.0312158	0.694079	-3.41711	0.031765
	1631430_at	FBgn0012058	Cdc27	0.219967	4.41104	2.48918	0.0312245	0.694079	-3.41734	0.0317579
	1628957_at	FBgn0001974	Rnmt	0.222856	2.62543	2.48665	0.0313619	0.695985	-3.42103	0.0316448
	1625363_at	FBgn0043532	Obp56i	0.25235	3.6465	2.48442	0.0314841	0.696422	-3.42429	0.031545
	1626166_at	FBgn0032803	CG13082	0.238296	2.17573	2.48377	0.0315192	0.696422	-3.42522	0.0315166
	1637429_at	FBgn0034086	CG8441	0.400009	2.36983	2.48356	0.0315307	0.696422	-3.42552	0.0315072
	1635272_a_at	FBgn0033970	CG10205	-0.232373	3.58918	-2.48305	0.0315591	0.696422	-3.42628	0.0314842
	1626088_at	FBgn0039902	Zip102B	0.660335	3.74866	2.48293	0.0315654	0.696422	-3.42645	0.0314791
	1626088_at	FBgn0039902	Zip102B	0.660335	3.74866	2.48293	0.0315654	0.696422	-3.42645	0.0314791
	1640355_at	FBgn0038484	CG5246	0.306635	3.48211	2.48181	0.031627	0.696517	-3.42808	0.0314293
	1634304_a_at	FBgn0036958	CG17233	0.24765	1.82755	2.47866	0.0318007	0.696517	-3.43267	0.0312898
	1626682_s_at	FBgn0031769	CG9135	-0.278064	1.20966	-2.47814	0.0318294	0.696517	-3.43343	0.0312669
	1632070_at	FBgn0040091	Ugt58Fa	-0.303335	1.10502	-2.47794	0.0318404	0.696517	-3.43372	0.0312581
	1636925_at	FBgn0051477	ATPsynepsilonL	0.190931	3.20804	2.47782	0.0318473	0.696517	-3.4339	0.0312526
	1624856_at	FBgn0028525	c(2)M	0.203269	0.198866	2.47698	0.0318937	0.696517	-3.43512	0.0312157
	1626908_at	FBgn0038243	CG8066	0.26431	0.598943	2.47686	0.0319004	0.696517	-3.4353	0.0312103
	1627821_s_at	FBgn0039900	Syt7	0.231209	4.47024	2.47552	0.0319748	0.696763	-3.43725	0.0311514
	1632325_at	FBgn0004374	neb	0.225198	2.01223	2.47533	0.0319852	0.696763	-3.43752	0.0311431
	1624592_at	FBgn0032247	CG5188	0.226468	1.55485	2.47183	0.0321804	0.698989	-3.44262	0.0309896
	1630676_at	FBgn0028496	CG30116	0.275708	0.869268	2.47064	0.0322471	0.698989	-3.44436	0.0309375
	1637647_at	FBgn0051148	Gba1a	-0.297437	4.44346	-2.47033	0.0322643	0.698989	-3.4448	0.0309242
	1635006_at	FBgn0038946	rdhB	0.237325	4.23522	2.4695	0.032311	0.698989	-3.44602	0.0308879
	1636718_s_at	FBgn0031896	CG4502	0.223215	5.25749	2.46925	0.0323252	0.698989	-3.44638	0.0308769
	1625358_s_at	FBgn0250785	vari	0.251826	3.46178	2.46817	0.032386	0.698989	-3.44796	0.0308298
	1624901_at	FBgn0032907	CG9272	0.214667	2.00045	2.46589	0.0325143	0.698989	-3.45127	0.0307309
	1623436_a_at	FBgn0259176	bun	0.217483	6.17609	2.4649	0.0325705	0.698989	-3.45272	0.0306878
	1637723_at	FBgn0002781	mod(mdg4)	0.234686	2.34493	2.46484	0.0325733	0.698989	-3.45279	0.0306856
	1637723_at	FBgn0261840	pre-mod(mdg4)-X	0.234686	2.34493	2.46484	0.0325733	0.698989	-3.45279	0.0306856
	1637723_at	FBgn0261841	pre-mod(mdg4)-AD	0.234686	2.34493	2.46484	0.0325733	0.698989	-3.45279	0.0306856
	1637723_at	FBgn0261842	pre-mod(mdg4)-AE	0.234686	2.34493	2.46484	0.0325733	0.698989	-3.45279	0.0306856
	1637723_at	FBgn0261843	pre-mod(mdg4)-W	0.234686	2.34493	2.46484	0.0325733	0.698989	-3.45279	0.0306856
	1637723_at	FBgn0261844	pre-mod(mdg4)-V	0.234686	2.34493	2.46484	0.0325733	0.698989	-3.45279	0.0306856
	1637723_at	FBgn0261845	pre-mod(mdg4)-U	0.234686	2.34493	2.46484	0.0325733	0.698989	-3.45279	0.0306856
	1625819_at	FBgn0265630	sno	0.27265	2.29915	2.46394	0.0326243	0.698989	-3.4541	0.0306467
	1636028_at	FBgn0037895	CG6723	0.289424	2.31245	2.46312	0.0326712	0.698989	-3.45531	0.0306109
	1633526_at	FBgn0005613	Sox15	0.299268	0.37918	2.45843	0.0329383	0.698989	-3.46213	0.0304092
	1626120_at	FBgn0250867	CG42238	0.436742	1.83924	2.458	0.0329629	0.698989	-3.46275	0.0303908
	1631369_at	FBgn0039670	CG7567	-0.351456	4.92513	-2.45783	0.0329727	0.698989	-3.463	0.0303834
	1631538_at	FBgn0054047	lncRNA:CR34047	-0.229361	-0.035681	-2.45782	0.0329732	0.698989	-3.46302	0.030383
	1634979_at	FBgn0038601	CG18600	-0.277771	1.98738	-2.45679	0.0330322	0.698989	-3.46451	0.0303389
	1624412_at	FBgn0267978	ap	0.256264	1.85381	2.4564	0.0330545	0.698989	-3.46508	0.0303223
	1637111_a_at	FBgn0263998	Ack-like	0.243468	1.54969	2.45601	0.0330773	0.698989	-3.46566	0.0303053
	1639795_at	FBgn0029914	CG4558	0.249362	1.83706	2.45448	0.033165	0.698989	-3.46788	0.0302402
	1638938_at	FBgn0026582	Hmg-2	-0.222867	1.23464	-2.45404	0.0331904	0.698989	-3.46852	0.0302214
	1638938_at	FBgn0026582	Hmg-2	-0.222867	1.23464	-2.45404	0.0331904	0.698989	-3.46852	0.0302214
	1627136_at	FBgn0019968	Khc-73	0.307421	3.3536	2.45382	0.0332032	0.698989	-3.46884	0.0302119
	1623689_a_at	FBgn0037222	CG14642	0.211398	2.86275	2.45378	0.0332052	0.698989	-3.46889	0.0302104
	1633405_s_at	FBgn0038799	MFS9	-0.233061	3.65085	-2.45363	0.033214	0.698989	-3.46911	0.030204
	1623740_at	FBgn0263608	l(3)72Dr	0.310757	3.49969	2.4526	0.0332735	0.698989	-3.47061	0.0301601
	1624827_at	FBgn0037572	CG11698	0.242836	1.91121	2.45234	0.0332889	0.698989	-3.471	0.0301488
	1638959_at	FBgn0033724	CG8501	0.29966	1.03789	2.45049	0.0333955	0.698989	-3.47368	0.0300705
	1632591_at	FBgn0035089	Phk-3	-0.255022	5.58336	-2.44984	0.0334336	0.698989	-3.47463	0.0300427
	1637105_at	FBgn0267792	rgr	-0.209554	0.556063	-2.44693	0.0336027	0.698989	-3.47886	0.0299198
	1639994_at	FBgn0029874	CG3342	0.311338	0.644506	2.44663	0.0336201	0.698989	-3.47929	0.0299073
	1633850_at	FBgn0035725	Mis12	-0.277709	2.32589	-2.44658	0.0336232	0.698989	-3.47937	0.029905
	1629615_at	FBgn0032104	aust	0.299836	1.23159	2.44645	0.0336307	0.698989	-3.47956	0.0298996
	1628584_at	FBgn0036910	Cyp305a1	0.201927	4.82732	2.44494	0.0337191	0.698989	-3.48176	0.0298358
	1629617_at	FBgn0038451	CG14893	-0.234316	0.70941	-2.44402	0.0337728	0.698989	-3.48309	0.0297973
	1636620_s_at	FBgn0010651	MFS14	0.218312	4.40908	2.44389	0.0337808	0.698989	-3.48328	0.0297916
	1637527_at	FBgn0050384	CG30384	0.261996	3.31752	2.44205	0.0338885	0.698989	-3.48595	0.0297146
	1637527_at	FBgn0053140	CG33140	0.261996	3.31752	2.44205	0.0338885	0.698989	-3.48595	0.0297146
	1640139_at	FBgn0004854	B-H2	-0.261317	0.588168	-2.4416	0.0339153	0.698989	-3.48661	0.0296955
	1632457_s_at	FBgn0002643	mam	0.232812	1.3005	2.44142	0.0339261	0.698989	-3.48688	0.0296879
	1629013_at	FBgn0029713	CG11436	-0.240789	0.561681	-2.44135	0.0339301	0.698989	-3.48698	0.029685
	1625119_at	FBgn0034249	RhoGAP54D	0.193582	0.406894	2.44123	0.0339368	0.698989	-3.48714	0.0296802
	1622898_a_at	FBgn0038307	mRpS10	-0.299087	3.78002	-2.44086	0.0339589	0.698989	-3.48769	0.0296646
	1622898_a_at	FBgn0085345	CG34316	-0.299087	3.78002	-2.44086	0.0339589	0.698989	-3.48769	0.0296646
	1630686_at	FBgn0030243	CG2186	-0.211389	1.42205	-2.4407	0.0339685	0.698989	-3.48792	0.0296578
	1634943_at	FBgn0260985	RfC4	-0.272498	1.15216	-2.44009	0.0340042	0.698989	-3.4888	0.0296325
	1627574_at	FBgn0035587	Gdap1	0.228535	2.26072	2.44004	0.0340069	0.698989	-3.48887	0.0296305
	1641383_s_at	FBgn0058178	CG40178	0.222354	0.201064	2.43984	0.034019	0.698989	-3.48917	0.029622
	1641383_s_at	FBgn0085612	CR41320	0.222354	0.201064	2.43984	0.034019	0.698989	-3.48917	0.029622
	1639105_at	FBgn0065110	ppk10	0.228186	0.435528	2.43927	0.0340526	0.698989	-3.49	0.0295982
	1629212_at	FBgn0039848	Loxl1	-0.211627	0.22488	-2.43865	0.0340893	0.698989	-3.4909	0.0295723
	1633445_at	FBgn0035788	CG8541	-0.201804	0.188898	-2.43786	0.0341363	0.698989	-3.49205	0.0295392
	1628083_at	FBgn0028743	Dhit	0.26228	3.92677	2.43758	0.0341528	0.698989	-3.49246	0.0295277
	1628083_at	FBgn0028743	Dhit	0.26228	3.92677	2.43758	0.0341528	0.698989	-3.49246	0.0295277
	1633173_s_at	FBgn0085430	CG34401	0.259821	1.05037	2.43471	0.0343232	0.700381	-3.49662	0.0294085
	1635229_at	FBgn0052072	Elo68alpha	-0.221186	6.49267	-2.4344	0.0343414	0.700381	-3.49707	0.0293958
	1624215_s_at	FBgn0027790	GV1	0.198026	5.98232	2.43404	0.0343633	0.700381	-3.4976	0.0293806
	1634991_at	FBgn0025709	CNT2	-0.254045	2.0871	-2.43395	0.0343686	0.700381	-3.49773	0.0293769
	1629181_at	FBgn0053494	CG33494	0.330731	4.48437	2.43229	0.0344679	0.700653	-3.50014	0.0293082
	1635360_at	FBgn0038839	Ktl	0.275795	3.91432	2.43149	0.0345156	0.700653	-3.5013	0.0292752
	1630048_at	FBgn0020258	ppk	-0.189579	-0.0473658	-2.43047	0.0345769	0.700653	-3.50279	0.029233
	1641445_s_at	FBgn0030894	Mvb12	0.235502	2.236	2.42987	0.0346125	0.700653	-3.50365	0.0292086
	1634959_at	FBgn0040338	TfIIA-S-2	-0.229463	0.348135	-2.42969	0.0346236	0.700653	-3.50392	0.029201
	1623023_at	FBgn0024728	Slip1	0.212692	4.72757	2.4296	0.0346292	0.700653	-3.50405	0.0291971
	1640506_at	FBgn0083938	BG642163	0.273511	3.78537	2.42866	0.0346855	0.700653	-3.50541	0.0291586
	1628759_a_at	FBgn0036814	CG14073	0.223628	3.81057	2.42792	0.0347303	0.700653	-3.50649	0.0291281
	1640535_s_at	FBgn0262544	CG43098	0.431747	2.74561	2.4278	0.0347373	0.700653	-3.50666	0.0291233
	1641385_at	FBgn0031324	CG14342	-0.221017	0.0920706	-2.42651	0.0348149	0.700653	-3.50853	0.0290706
	1632063_s_at	FBgn0035558	CG11357	0.265709	1.81699	2.4246	0.0349307	0.702021	-3.51131	0.0289922
	1639408_a_at	FBgn0085387	shakB	0.25613	3.47687	2.42359	0.0349922	0.702513	-3.51278	0.0289508
	1637336_at	FBgn0038974	CG5377	0.263576	3.11101	2.42191	0.0350943	0.702928	-3.51522	0.0288823
	1633067_at	FBgn0085405	CG34376	0.200559	3.57148	2.42086	0.0351578	0.702928	-3.51673	0.0288399
	1629409_s_at	FBgn0283477	SF2	0.290236	2.89887	2.4202	0.0351983	0.702928	-3.51769	0.0288129
	1626201_at	FBgn0051091	CG31091	-0.407664	1.29835	-2.41781	0.0353446	0.705106	-3.52116	0.028716
	1636203_at	FBgn0011758	B-H1	-0.224959	0.0468481	-2.41628	0.0354381	0.705996	-3.52338	0.0286544
	1628795_s_at	FBgn0031779	CG9175	0.254295	3.09738	2.41477	0.0355313	0.705996	-3.52557	0.0285933
	1623658_at	FBgn0040828	CG13306	-0.224117	0.512345	-2.41466	0.0355382	0.705996	-3.52574	0.0285888
	1633167_s_at	FBgn0030880	CG6788	0.481432	1.69019	2.41253	0.0356699	0.707871	-3.52883	0.028503
	1626056_a_at	FBgn0035766	eco	0.231729	2.70734	2.40862	0.0359121	0.711187	-3.53449	0.0283467
	1640845_at	FBgn0037046	CG10581	0.236599	2.03258	2.40769	0.0359701	0.711591	-3.53584	0.0283095
	1635263_at	FBgn0033519	CG11825	0.252633	1.9891	2.40587	0.0360837	0.712651	-3.53848	0.028237
	1633373_at	FBgn0030376	CG2750	0.1996	4.45844	2.40563	0.0360988	0.712651	-3.53883	0.0282274
	1627235_at	FBgn0038051	CG17207	0.217101	3.21149	2.40357	0.0362279	0.714455	-3.54181	0.0281456
	1628669_at	FBgn0034617	Panx	0.303382	2.21986	2.40076	0.0364052	0.715628	-3.5459	0.0280342
	1639807_s_at	FBgn0032876	Cen	0.245134	2.07812	2.40023	0.0364384	0.715628	-3.54666	0.0280134
	1640210_at	FBgn0032864	CG2493	0.236958	0.276162	2.39826	0.0365628	0.716586	-3.54951	0.0279359
	1640210_at	FBgn0283467	Pol32	0.236958	0.276162	2.39826	0.0365628	0.716586	-3.54951	0.0279359
	1632620_at	FBgn0031424	VGlut	-0.215097	0.490949	-2.39753	0.0366096	0.716761	-3.55058	0.0279069
	1638859_at	FBgn0037989	ATP8B	0.2313	0.876287	2.39518	0.0367589	0.717397	-3.55398	0.0278148
	1629378_at	FBgn0036325	CG10752	0.285243	3.10687	2.39441	0.0368079	0.717397	-3.55509	0.0277847
	1623467_at	FBgn0038241	CG8087	-0.192003	0.133629	-2.39418	0.0368222	0.717397	-3.55542	0.0277759
	1637304_at	FBgn0261801	CG42747	-0.229787	0.173115	-2.39361	0.0368587	0.717397	-3.55625	0.0277535
	1629215_at	FBgn0032850	Kua	0.346112	1.65152	2.39344	0.0368699	0.717397	-3.5565	0.0277467
	1635623_at	FBgn0036680	Cpr73D	0.253001	2.07254	2.39312	0.0368902	0.717397	-3.55696	0.0277342
	1637361_a_at	FBgn0025388	CG12179	0.242688	3.55718	2.39265	0.0369204	0.717397	-3.55764	0.0277158
	1634269_at	FBgn0031897	CG13784	0.192833	5.70597	2.39227	0.0369449	0.717397	-3.5582	0.0277009
	1624497_at	FBgn0264785	Hph	0.217783	1.92911	2.38933	0.037133	0.718128	-3.56244	0.0275868
	1636528_at	FBgn0039562	Gp93	0.181128	6.14197	2.38852	0.0371854	0.718128	-3.56362	0.0275552
	1639679_at	FBgn0259178	5PtaseI	0.2155	0.396703	2.38814	0.0372099	0.718128	-3.56417	0.0275404
	1623437_at	FBgn0035721	CG9948	-0.230996	1.20748	-2.3863	0.0373289	0.719329	-3.56684	0.027469
	1636683_at	FBgn0037477	CG14610	0.413109	1.04321	2.386	0.037348	0.719329	-3.56727	0.0274576
	1627150_at	FBgn0024987	ssx	0.224181	4.17692	2.38384	0.037488	0.719451	-3.5704	0.0273742
	1631102_a_at	FBgn0000028	acj6	0.337984	1.16329	2.38215	0.0375977	0.719451	-3.57284	0.0273093
	1624721_at	FBgn0022960	vimar	0.351866	1.46121	2.3818	0.0376209	0.719451	-3.57335	0.0272956
	1630477_at	FBgn0002775	msl-3	0.31738	1.86185	2.38139	0.0376478	0.719451	-3.57395	0.0272798
	1625565_at	FBgn0039254	Nmnat	0.32431	2.04947	2.38117	0.037662	0.719451	-3.57427	0.0272714
	1626265_at	FBgn0264493	rdx	-0.258133	0.418594	-2.3804	0.0377124	0.719451	-3.57538	0.0272418
	1628668_at	FBgn0265266	CG13639	0.208537	5.90443	2.37947	0.0377729	0.719451	-3.57672	0.0272063
	1626676_at	FBgn0025740	PlexB	0.212077	4.33519	2.37888	0.0378118	0.719451	-3.57758	0.0271836
	1635447_at	FBgn0034225	veil	-0.248159	4.58524	-2.37749	0.0379026	0.719451	-3.57959	0.0271306
	1635028_s_at	FBgn0036169	Fuca	-0.516579	2.63488	-2.37713	0.0379261	0.719451	-3.5801	0.027117
	1635028_s_at	FBgn0036170	CG11714	-0.516579	2.63488	-2.37713	0.0379261	0.719451	-3.5801	0.027117
	1631402_s_at	FBgn0261239	Hr39	-0.264118	3.19942	-2.37641	0.0379736	0.719451	-3.58115	0.0270894
	1631009_at	FBgn0039559	NSD	0.262539	2.67493	2.37544	0.0380376	0.719451	-3.58256	0.0270523
	1635541_s_at	FBgn0043070	MESK2	0.262394	3.46945	2.37192	0.0382697	0.719451	-3.58764	0.0269189
	1626135_s_at	FBgn0027588	GCS2alpha	0.193517	6.00312	2.37108	0.0383254	0.719451	-3.58885	0.0268871
	1639632_at	FBgn0037489	CG1234	0.22116	2.60086	2.36934	0.0384413	0.719451	-3.59138	0.0268212
	1624231_s_at	FBgn0010348	Arf79F	0.1948	6.56845	2.36916	0.0384529	0.719451	-3.59163	0.0268146
	1626890_at	FBgn0030058	CG11294	0.286396	1.27974	2.36916	0.0384534	0.719451	-3.59164	0.0268143
	1634344_at	FBgn0001977	CIAPIN1	-0.240532	1.00319	-2.36899	0.0384648	0.719451	-3.59189	0.0268079
	1634344_at	FBgn0001977	CIAPIN1	-0.240532	1.00319	-2.36899	0.0384648	0.719451	-3.59189	0.0268079
	1624569_at	FBgn0051087	CG31087	-0.393443	2.13599	-2.36883	0.0384751	0.719451	-3.59211	0.0268021
	1625558_a_at	FBgn0034201	CG17290	-0.232673	0.0152605	-2.36872	0.0384824	0.719451	-3.59227	0.0267979
	1623954_s_at	FBgn0261573	CoRest	-0.231587	0.176128	-2.36827	0.0385123	0.719451	-3.59292	0.026781
	1634447_at	FBgn0051140	CG31140	0.190572	4.78457	2.3675	0.0385636	0.719451	-3.59403	0.026752
	1636489_at	FBgn0039501	TTLL6B	0.195197	4.62516	2.36604	0.0386613	0.719451	-3.59614	0.0266971
	1623304_at	FBgn0031764	CG9107	-0.263351	0.507223	-2.36514	0.038722	0.719451	-3.59745	0.026663
	1640552_at	FBgn0046114	Gclm	0.267988	1.53766	2.36513	0.0387223	0.719451	-3.59746	0.0266629
	1635188_at	FBgn0032973	CG6675	0.291566	3.3204	2.36484	0.0387418	0.719451	-3.59788	0.026652
	1630970_at	FBgn0259224	CG42324	0.324027	1.12702	2.36472	0.0387496	0.719451	-3.59805	0.0266476
	1637761_at	FBgn0259713	CG42367	-0.213514	0.00859028	-2.36302	0.0388642	0.719451	-3.60051	0.0265837
	1632353_at	FBgn0031001	CG7884	-0.197698	-0.0924382	-2.36226	0.0389152	0.719451	-3.60161	0.0265554
	1627601_at	FBgn0020378	Sp1	-0.185707	-0.0665719	-2.36221	0.0389187	0.719451	-3.60168	0.0265535
	1631554_at	FBgn0259994	OtopLa	0.212307	4.61725	2.36218	0.0389207	0.719451	-3.60173	0.0265523
	1626710_at	FBgn0030310	PGRP-SA	0.216644	2.45735	2.36218	0.0389208	0.719451	-3.60173	0.0265523
	1635836_at	FBgn0036070	CG8072	0.274169	3.89065	2.36211	0.0389251	0.719451	-3.60182	0.0265499
	1628132_at	FBgn0032517	CG7099	0.313773	0.855555	2.36127	0.0389819	0.719451	-3.60304	0.0265185
	1637642_at	FBgn0030938	CG15047	0.196276	0.0747176	2.36103	0.0389982	0.719451	-3.60339	0.0265094
	1641247_at	FBgn0031051	Ranbp21	0.178569	2.28274	2.36045	0.0390372	0.719451	-3.60422	0.0264879
	1625750_at	FBgn0038830	CG17272	-0.228703	4.64026	-2.36017	0.0390559	0.719451	-3.60462	0.0264776
	1629228_at	FBgn0053147	Hs3st-A	0.249564	3.40526	2.3596	0.0390949	0.719451	-3.60545	0.0264561
	1626869_a_at	FBgn0051619	nolo	0.215142	0.744008	2.35895	0.0391387	0.719451	-3.60639	0.0264321
	1632380_at	FBgn0259168	mnb	0.224891	4.12808	2.35761	0.0392293	0.719451	-3.60832	0.0263824
	1633792_a_at	FBgn0261885	osa	0.201918	3.07468	2.35707	0.0392659	0.719451	-3.6091	0.0263624
	1641212_a_at	FBgn0266084	Fhos	0.25495	3.22029	2.35656	0.0393012	0.719451	-3.60985	0.0263432
	1632228_at	FBgn0039052	CG6733	-1.00851	1.76064	-2.35468	0.0394289	0.719451	-3.61256	0.0262739
	1637212_at	FBgn0035802	Pura	0.182508	0.28005	2.35447	0.0394433	0.719451	-3.61286	0.026266
	1639677_at	FBgn0020257	Ppa	0.309816	2.41653	2.3524	0.0395847	0.719451	-3.61585	0.0261898
	1623320_at	FBgn0040344	CG3711	0.188495	2.90725	2.352	0.0396124	0.719451	-3.61643	0.0261749
	1637567_at	FBgn0050360	Mal-A6	-0.204792	7.5799	-2.35117	0.039669	0.719451	-3.61762	0.0261445
	1624852_at	FBgn0263072	CG43347	0.26106	1.05404	2.35099	0.0396815	0.719451	-3.61789	0.0261378
	1623355_at	FBgn0003965	v	-0.189528	3.52661	-2.35083	0.0396921	0.719451	-3.61811	0.0261321
	1624298_at	FBgn0053257	CG33257	-0.192476	0.051845	-2.35058	0.0397098	0.719451	-3.61848	0.0261227
	1625519_at	FBgn0032643	GCS2beta	0.205392	3.29962	2.34906	0.0398141	0.719451	-3.62067	0.0260671
	1629066_at	FBgn0036278	CrzR	0.223148	3.98727	2.34573	0.0400441	0.719451	-3.62548	0.0259453
	1629066_at	FBgn0036278	CrzR	0.223148	3.98727	2.34573	0.0400441	0.719451	-3.62548	0.0259453
	1638004_at	FBgn0004580	Cbp53E	0.20595	5.75974	2.34539	0.0400674	0.719451	-3.62596	0.025933
	1628967_at	FBgn0004590	Eig71Ec	-0.196019	-0.113139	-2.34503	0.0400925	0.719451	-3.62648	0.0259198
	1625035_at	FBgn0011674	insc	0.187248	0.843168	2.34463	0.0401201	0.719451	-3.62706	0.0259053
	1636854_at	FBgn0262990	lncRNA:CR43298	-0.235894	0.373211	-2.34162	0.0403297	0.719451	-3.63141	0.0257959
	1634180_s_at	FBgn0031515	CG9664	0.242689	2.46544	2.34129	0.0403526	0.719451	-3.63188	0.025784
	1628509_at	FBgn0028541	TM9SF4	0.188394	5.03579	2.34072	0.0403926	0.719451	-3.63271	0.0257632
	1628159_a_at	FBgn0052206	CG32206	0.214511	2.37035	2.34045	0.0404113	0.719451	-3.63309	0.0257535
	1633888_s_at	FBgn0028369	kirre	0.338846	1.7799	2.33874	0.0405306	0.719451	-3.63555	0.0256919
	1636499_at	FBgn0264325	Atg6	-0.209287	3.14949	-2.33705	0.0406491	0.719451	-3.63799	0.025631
	1634003_at	FBgn0052685	ZAP3	0.218179	3.04786	2.33666	0.040677	0.719451	-3.63856	0.0256167
	1632761_at	FBgn0083942	CG34106	0.392263	3.29838	2.3356	0.0407511	0.719451	-3.64008	0.0255788
	1627859_at	FBgn0051646	DIP-theta	0.224743	1.10964	2.33408	0.0408587	0.719451	-3.64228	0.0255241
	1626026_at	FBgn0037916	CG5342	0.216507	1.00281	2.33328	0.040915	0.719451	-3.64343	0.0254955
	1638515_at	FBgn0033723	CG13155	0.282938	2.68112	2.33232	0.0409827	0.719451	-3.6448	0.0254613
	1632964_at	FBgn0034647	pirk	-0.336046	3.31216	-2.33142	0.0410467	0.719451	-3.64611	0.025429
	1629740_at	FBgn0051617	His1:CG31617	0.287709	0.548904	2.33049	0.0411131	0.719451	-3.64745	0.0253957
	1629740_at	FBgn0053801	His1:CG33801	0.287709	0.548904	2.33049	0.0411131	0.719451	-3.64745	0.0253957
	1629740_at	FBgn0053804	His1:CG33804	0.287709	0.548904	2.33049	0.0411131	0.719451	-3.64745	0.0253957
	1629740_at	FBgn0053807	His1:CG33807	0.287709	0.548904	2.33049	0.0411131	0.719451	-3.64745	0.0253957
	1629740_at	FBgn0053810	His1:CG33810	0.287709	0.548904	2.33049	0.0411131	0.719451	-3.64745	0.0253957
	1629740_at	FBgn0053813	His1:CG33813	0.287709	0.548904	2.33049	0.0411131	0.719451	-3.64745	0.0253957
	1629740_at	FBgn0053816	His1:CG33816	0.287709	0.548904	2.33049	0.0411131	0.719451	-3.64745	0.0253957
	1629740_at	FBgn0053819	His1:CG33819	0.287709	0.548904	2.33049	0.0411131	0.719451	-3.64745	0.0253957
	1629740_at	FBgn0053822	His1:CG33822	0.287709	0.548904	2.33049	0.0411131	0.719451	-3.64745	0.0253957
	1629740_at	FBgn0053825	His1:CG33825	0.287709	0.548904	2.33049	0.0411131	0.719451	-3.64745	0.0253957
	1629740_at	FBgn0053828	His1:CG33828	0.287709	0.548904	2.33049	0.0411131	0.719451	-3.64745	0.0253957
	1629740_at	FBgn0053831	His1:CG33831	0.287709	0.548904	2.33049	0.0411131	0.719451	-3.64745	0.0253957
	1629740_at	FBgn0053834	His1:CG33834	0.287709	0.548904	2.33049	0.0411131	0.719451	-3.64745	0.0253957
	1629740_at	FBgn0053837	His1:CG33837	0.287709	0.548904	2.33049	0.0411131	0.719451	-3.64745	0.0253957
	1629740_at	FBgn0053840	His1:CG33840	0.287709	0.548904	2.33049	0.0411131	0.719451	-3.64745	0.0253957
	1629740_at	FBgn0053843	His1:CG33843	0.287709	0.548904	2.33049	0.0411131	0.719451	-3.64745	0.0253957
	1629740_at	FBgn0053846	His1:CG33846	0.287709	0.548904	2.33049	0.0411131	0.719451	-3.64745	0.0253957
	1629740_at	FBgn0053849	His1:CG33849	0.287709	0.548904	2.33049	0.0411131	0.719451	-3.64745	0.0253957
	1629740_at	FBgn0053852	His1:CG33852	0.287709	0.548904	2.33049	0.0411131	0.719451	-3.64745	0.0253957
	1629740_at	FBgn0053855	His1:CG33855	0.287709	0.548904	2.33049	0.0411131	0.719451	-3.64745	0.0253957
	1629740_at	FBgn0053858	His1:CG33858	0.287709	0.548904	2.33049	0.0411131	0.719451	-3.64745	0.0253957
	1629740_at	FBgn0053861	His1:CG33861	0.287709	0.548904	2.33049	0.0411131	0.719451	-3.64745	0.0253957
	1629740_at	FBgn0053864	His1:CG33864	0.287709	0.548904	2.33049	0.0411131	0.719451	-3.64745	0.0253957
	1624839_at	FBgn0001168	h	0.192113	6.47128	2.32912	0.0412102	0.719451	-3.64942	0.025347
	1636549_at	FBgn0261928	CG42795	0.187219	1.248	2.32857	0.0412495	0.719451	-3.65022	0.0253274
	1637420_a_at	FBgn0027575	GABA-B-R2	0.27483	1.17952	2.3273	0.0413398	0.719451	-3.65204	0.0252824
	1630087_at	FBgn0032376	Tsp33B	0.263314	4.25132	2.32692	0.0413674	0.719451	-3.6526	0.0252687
	1623193_at	FBgn0053123	LeuRS	-0.229532	3.27963	-2.32633	0.0414095	0.719451	-3.65344	0.0252478
	1624756_at	FBgn0027572	CG5009	0.187242	4.80473	2.32508	0.0414988	0.719451	-3.65524	0.0252036
	1637700_s_at	FBgn0034858	eIF2Bdelta	0.267089	3.35183	2.32457	0.0415352	0.719451	-3.65597	0.0251857
	1630865_s_at	FBgn0039846	PNPase	0.25407	2.08537	2.32433	0.0415523	0.719451	-3.65631	0.0251773
	1638765_at	FBgn0032016	Mettl14	0.228057	1.17139	2.32386	0.041586	0.719451	-3.65699	0.0251607
	1639587_s_at	FBgn0037144	CG7458	0.314814	1.58645	2.32353	0.0416099	0.719451	-3.65747	0.025149
	1624489_a_at	FBgn0023522	CG11596	0.276635	2.7767	2.32308	0.0416423	0.719451	-3.65812	0.025133
	1632319_at	FBgn0038589	CG18598	-0.197622	3.34783	-2.32176	0.0417372	0.719451	-3.66002	0.0250866
	1635410_at	FBgn0035476	CG12766	-0.258016	4.71863	-2.32091	0.0417987	0.719451	-3.66124	0.0250566
	1637828_a_at	FBgn0085447	sif	0.238138	5.15888	2.32071	0.0418131	0.719451	-3.66153	0.0250496
	1629261_at	FBgn0020660	eIF4B	-0.220863	0.260051	-2.32057	0.0418233	0.719451	-3.66173	0.0250446
	1638823_at	FBgn0050259	CG30259	0.220828	0.255153	2.31986	0.0418747	0.719451	-3.66276	0.0250197
	1628892_s_at	FBgn0036305	CG10984	0.230284	3.80839	2.31908	0.0419311	0.719451	-3.66388	0.0249923
	1630721_s_at	FBgn0037218	aux	0.199607	4.64078	2.31907	0.0419315	0.719451	-3.66389	0.0249921
	1637729_at	FBgn0016920	nompC	-0.236394	0.418695	-2.31875	0.0419546	0.719451	-3.66435	0.0249809
	1638567_at	FBgn0037228	CG1092	0.25995	4.52812	2.31836	0.0419834	0.719451	-3.66492	0.024967
	1624402_at	FBgn0032086	CG17906	-0.248314	0.27292	-2.31798	0.0420111	0.719451	-3.66547	0.0249536
	1632971_at	FBgn0033523	CG12895	-0.178187	4.1969	-2.31787	0.0420188	0.719451	-3.66562	0.0249499
	1641371_at	FBgn0033203	CG2070	0.218774	3.03693	2.31746	0.0420488	0.719451	-3.66621	0.0249354
	1624599_at	FBgn0085360	CG34331	0.196795	5.90013	2.31717	0.0420696	0.719451	-3.66663	0.0249254
	1636659_at	FBgn0035737	Cpr65Ec	0.378291	1.01313	2.3171	0.0420743	0.719451	-3.66672	0.0249231
	1638388_at	FBgn0039323	CG10559	0.191688	1.783	2.31709	0.0420755	0.719451	-3.66674	0.0249226
	1633185_at	FBgn0029974	dpr14	0.233387	1.63071	2.31686	0.0420919	0.719451	-3.66707	0.0249147
	1628035_at	FBgn0034322	CG18536	-0.244808	1.42357	-2.31577	0.0421716	0.719451	-3.66865	0.0248764
	1629720_s_at	FBgn0040233	cana	0.277327	1.10708	2.31572	0.0421754	0.719451	-3.66872	0.0248746
	1629720_s_at	FBgn0052831	CG33695	0.277327	1.10708	2.31572	0.0421754	0.719451	-3.66872	0.0248746
	1635078_at	FBgn0261085	Syt12	0.199914	0.464019	2.31486	0.0422378	0.719451	-3.66995	0.0248447
	1634185_at	FBgn0052053	CG32053	-0.205584	0.658446	-2.31208	0.0424411	0.719451	-3.67395	0.024748
	1623722_at	FBgn0015520	nonA-l	0.342698	3.39314	2.30946	0.0426335	0.719451	-3.67772	0.0246572
	1622937_at	FBgn0036773	CG13698	0.23695	2.82023	2.30801	0.0427397	0.719451	-3.67979	0.0246074
	1632865_s_at	FBgn0037065	CG12974	-0.283903	3.04181	-2.30788	0.04275	0.719451	-3.67999	0.0246026
	1625546_at	FBgn0029912	CG4557	0.212863	0.619891	2.30743	0.0427833	0.719451	-3.68064	0.024587
	1639722_s_at	FBgn0030745	CG4239	0.183705	6.394	2.30739	0.042786	0.719451	-3.6807	0.0245857
	1636064_at	FBgn0266672	Sec8	-0.192374	2.81699	-2.30735	0.0427891	0.719451	-3.68076	0.0245843
	1639211_at	FBgn0062928	hpRNA:CR33940	-0.186516	3.83574	-2.30605	0.0428849	0.719451	-3.68262	0.0245396
	1623063_at	FBgn0035170	dpr20	0.298642	1.39246	2.30563	0.042916	0.719451	-3.68322	0.0245252
	1623203_at	FBgn0032258	CG7456	0.217889	3.57192	2.30528	0.0429422	0.719451	-3.68373	0.0245131
	1631143_at	FBgn0260943	Rbp6	0.209505	0.297098	2.30438	0.0430085	0.719451	-3.68502	0.0244823
	1625907_at	FBgn0263667	Lpt	0.259728	1.122	2.30438	0.0430086	0.719451	-3.68502	0.0244823
	1627818_s_at	FBgn0004516	Gad1	0.197731	6.31372	2.30227	0.0431657	0.719451	-3.68805	0.0244099
	1630217_at	FBgn0039277	Nepl16	0.272867	2.70512	2.30216	0.0431734	0.719451	-3.6882	0.0244063
	1639927_at	FBgn0038334	h-cup	0.214833	2.82118	2.30012	0.0433262	0.719451	-3.69115	0.0243364
	1626053_at	FBgn0041097	robo3	0.181873	0.577808	2.3001	0.0433274	0.719451	-3.69117	0.0243358
	1639345_at	FBgn0037326	CG14669	0.222646	0.721477	2.29994	0.0433395	0.719451	-3.6914	0.0243303
	1628534_at	FBgn0030905	CG15059	0.19931	2.16135	2.29954	0.0433691	0.719451	-3.69197	0.0243168
	1634892_at	FBgn0015336	CG15865	0.264742	0.320056	2.29947	0.0433744	0.719451	-3.69207	0.0243144
	1623105_at	FBgn0040628	CAH16	0.286412	3.04267	2.29851	0.0434464	0.719451	-3.69345	0.0242816
	1638542_at	FBgn0038789	Ir92a	0.173423	0.0466094	2.29738	0.0435312	0.719451	-3.69508	0.0242432
	1633736_at	FBgn0032690	CG10333	0.230378	2.56895	2.29708	0.043554	0.719451	-3.69551	0.0242329
	1631716_at	FBgn0024977	vilya	0.244743	0.43581	2.29691	0.0435664	0.719451	-3.69575	0.0242273
	1631475_at	FBgn0038530	AttD	-0.439838	0.262959	-2.29684	0.0435721	0.719451	-3.69586	0.0242247
	1630399_at	FBgn0039709	Cad99C	0.400226	1.64784	2.29603	0.0436327	0.719451	-3.69702	0.0241974
	1629786_a_at	FBgn0051116	ClC-a	0.190222	4.21479	2.29553	0.0436706	0.719451	-3.69774	0.0241803
	1637937_at	FBgn0264885	lncRNA:CR44076	0.237679	0.491573	2.29541	0.043679	0.719451	-3.6979	0.0241765
	1632281_at	FBgn0034598	CG4266	0.273007	2.75797	2.29522	0.0436934	0.719451	-3.69817	0.0241701
	1636330_at	FBgn0032281	CG17107	0.378963	2.98261	2.29488	0.0437189	0.719451	-3.69866	0.0241586
	1638748_at	FBgn0000575	emc	0.194641	5.43259	2.29432	0.0437616	0.719451	-3.69947	0.0241395
	1625600_a_at	FBgn0034075	Asph	0.238802	2.60442	2.29382	0.0437993	0.719451	-3.70019	0.0241226
	1628131_at	FBgn0004463	RpIII128	-0.238078	1.12839	-2.29359	0.0438168	0.719451	-3.70052	0.0241148
	1624973_at	FBgn0262097	lncRNA:CR42850	0.292347	6.08441	2.29321	0.0438454	0.719451	-3.70107	0.024102
	1624973_at	FBgn0262097	lncRNA:CR42850	0.292347	6.08441	2.29321	0.0438454	0.719451	-3.70107	0.024102
	1624235_at	FBgn0259823	CG42404	0.230757	1.71394	2.29312	0.0438524	0.719451	-3.7012	0.0240988
	1634528_at	FBgn0037743	CG8412	0.216463	3.21038	2.29275	0.04388	0.719451	-3.70172	0.0240865
	1626083_at	FBgn0036178	CG14137	0.282273	0.181279	2.2924	0.0439065	0.719451	-3.70222	0.0240747
	1625004_at	FBgn0042134	Capr	0.242808	4.25707	2.29162	0.0439657	0.719451	-3.70334	0.0240484
	1629828_at	FBgn0040370	CG13375	-0.243797	-0.0566448	-2.29109	0.0440058	0.719451	-3.7041	0.0240306
	1623599_at	FBgn0004132	boca	-0.241002	3.12502	-2.29059	0.0440441	0.719451	-3.70483	0.0240136
	1639190_at	FBgn0011653	mas	-0.230666	0.200297	-2.29026	0.0440689	0.719451	-3.7053	0.0240026
	1636732_at	FBgn0030316	CG11695	-0.206771	0.855338	-2.29008	0.0440825	0.719451	-3.70555	0.0239966
	1636452_at	FBgn0029646	CG14423	0.255135	-0.0325975	2.29008	0.0440826	0.719451	-3.70556	0.0239966
	1635116_a_at	FBgn0038108	CG7518	-0.204851	2.50527	-2.28995	0.0440928	0.719451	-3.70575	0.023992
	1638477_at	FBgn0030544	CG13403	-0.191665	0.21113	-2.28932	0.0441408	0.719451	-3.70665	0.0239709
	1641170_a_at	FBgn0259139	glo	0.185859	4.00821	2.28919	0.0441505	0.719451	-3.70684	0.0239666
	1630598_at	FBgn0036023	CG18179	-0.547496	4.50836	-2.28762	0.0442699	0.719451	-3.70908	0.023914
	1638463_at	FBgn0037656	CG11986	0.294827	1.58424	2.28652	0.044354	0.719451	-3.71066	0.0238772
	1626334_at	FBgn0036072	CG6628	-0.247231	5.50835	-2.28649	0.0443567	0.719451	-3.71071	0.023876
	1630201_a_at	FBgn0031857	LUBEL	0.216192	2.8813	2.28528	0.044449	0.719451	-3.71244	0.0238357
	1624736_a_at	FBgn0034717	CG5819	0.203981	2.54289	2.28503	0.0444679	0.719451	-3.7128	0.0238275
	1636583_at	FBgn0036996	mag	0.272034	6.56614	2.28435	0.0445205	0.719451	-3.71378	0.0238046
	1636444_at	FBgn0034502	CG13871	0.305795	2.35023	2.28392	0.0445531	0.719451	-3.71439	0.0237905
	1627652_at	FBgn0259994	OtopLa	0.201569	0.353877	2.28347	0.0445881	0.719451	-3.71504	0.0237753
	1625591_at	FBgn0039344	CG4582	-0.240621	-0.0531401	-2.28084	0.0447903	0.719451	-3.71881	0.0236881
	1637754_at	FBgn0037765	CG9458	-0.197447	5.95294	-2.28072	0.0447997	0.719451	-3.71898	0.023684
	1627499_at	FBgn0250839	CG2016	0.266388	2.62866	2.28008	0.0448489	0.719451	-3.7199	0.0236629
	1637031_at	FBgn0001147	gsb-n	0.254817	1.06731	2.27927	0.0449118	0.719451	-3.72106	0.023636
	1634205_at	FBgn0028949	CG15254	-0.192755	2.72198	-2.27814	0.0449996	0.719451	-3.72269	0.0235986
	1631559_s_at	FBgn0040823	dpr6	0.208018	0.3266	2.27784	0.0450222	0.719451	-3.72311	0.023589
	1631175_a_at	FBgn0032681	CG10283	0.265006	1.35642	2.27749	0.0450495	0.719451	-3.72361	0.0235773
	1632715_at	FBgn0014073	Tie	0.197525	0.535684	2.27677	0.0451052	0.719451	-3.72464	0.0235537
	1640734_a_at	FBgn0038721	subdued	0.238908	4.1412	2.27619	0.0451508	0.719451	-3.72548	0.0235344
	1640734_a_at	FBgn0038721	subdued	0.238908	4.1412	2.27619	0.0451508	0.719451	-3.72548	0.0235344
	1633657_at	FBgn0051533	CG31533	0.236403	4.89797	2.27517	0.0452298	0.719451	-3.72693	0.023501
	1628313_at	FBgn0262509	nrm	0.254939	0.204308	2.27514	0.0452325	0.719451	-3.72698	0.0234998
	1636795_at	FBgn0028962	AlaRS-m	-0.23667	1.81919	-2.27445	0.0452862	0.719451	-3.72797	0.0234772
	1634240_at	FBgn0039342	CG5107	-0.197941	9.30236	-2.27432	0.0452966	0.719451	-3.72816	0.0234728
	1640767_s_at	FBgn0033054	CG14591	0.214251	4.17419	2.27419	0.0453061	0.719451	-3.72834	0.0234688
	1628739_at	FBgn0260964	Vmat	0.197385	3.89485	2.2737	0.0453449	0.719451	-3.72905	0.0234525
	1633022_at	FBgn0035526	CG1316	0.20454	3.86105	2.27367	0.0453474	0.719451	-3.72909	0.0234514
	1637869_at	FBgn0243486	rdo	0.269565	1.26535	2.27339	0.0453691	0.719451	-3.72949	0.0234423
	1636183_at	FBgn0052198	CG32198	-0.663428	3.26208	-2.27257	0.0454333	0.719451	-3.73067	0.0234154
	1627434_at	FBgn0264305	CG43783	0.301602	1.72169	2.27237	0.0454488	0.719451	-3.73095	0.0234089
	1627434_at	FBgn0264307	orb2	0.301602	1.72169	2.27237	0.0454488	0.719451	-3.73095	0.0234089
	1627417_s_at	FBgn0035179	CG12038	0.223337	0.616527	2.27128	0.0455342	0.719451	-3.73251	0.0233733
	1635161_at	FBgn0261534	l(2)34Fc	0.209703	6.26648	2.27085	0.0455675	0.719451	-3.73312	0.0233594
	1631836_at	FBgn0032763	CG17568	0.241278	0.576131	2.27029	0.0456117	0.719451	-3.73393	0.023341
	1626151_at	FBgn0041246	Gr32a	0.249782	1.02904	2.27013	0.0456245	0.719451	-3.73416	0.0233357
	1623571_a_at	FBgn0032886	CG9328	0.191412	3.83375	2.2698	0.0456502	0.719451	-3.73463	0.023325
	1637250_at	FBgn0037525	CG17816	0.245274	2.59339	2.26962	0.0456648	0.719451	-3.73489	0.023319
	1634412_at	FBgn0270927	betaGlu	0.200483	2.71222	2.26881	0.0457281	0.719451	-3.73605	0.0232927
	1624067_at	FBgn0033887	St4	0.212415	0.623277	2.26854	0.0457495	0.719451	-3.73643	0.0232839
	1632592_a_at	FBgn0264449	CG43867	0.201057	0.101683	2.26834	0.0457649	0.719451	-3.73671	0.0232775
	1626452_at	FBgn0033289	CG2121	0.203104	2.88149	2.26815	0.0457801	0.719451	-3.73699	0.0232712
	1628037_at	FBgn0044030	mRpS14	0.208943	0.877174	2.26682	0.0458854	0.719451	-3.7389	0.0232279
	1628037_at	FBgn0052533	CG32533	0.208943	0.877174	2.26682	0.0458854	0.719451	-3.7389	0.0232279
	1634463_at	FBgn0031004	CG7992	-0.239634	3.74891	-2.26605	0.0459464	0.719451	-3.74	0.0232028
	1624300_s_at	FBgn0011817	nmo	0.188275	5.23946	2.26585	0.0459622	0.719451	-3.74029	0.0231964
	1635880_at	FBgn0034120	CG15710	0.237444	1.43627	2.2655	0.0459894	0.719451	-3.74078	0.0231852
	1631300_at	FBgn0010383	Cyp18a1	-0.236747	3.26572	-2.26545	0.0459933	0.719451	-3.74085	0.0231836
	1625007_a_at	FBgn0016975	stnB	0.203589	5.17096	2.26532	0.0460035	0.719451	-3.74104	0.0231794
	1625007_a_at	FBgn0016976	stnA	0.203589	5.17096	2.26532	0.0460035	0.719451	-3.74104	0.0231794
	1641607_at	FBgn0026404	Dronc	0.283725	2.53913	2.26528	0.0460069	0.719451	-3.7411	0.023178
	1638869_at	FBgn0033942	Cpr51A	-0.180763	4.94439	-2.26516	0.0460167	0.719451	-3.74128	0.023174
	1639310_at	FBgn0030963	CG7101	0.272402	0.938842	2.26436	0.0460801	0.719451	-3.74242	0.0231481
	1634437_at	FBgn0036306	CG10973	0.26967	3.06064	2.26419	0.0460937	0.719451	-3.74267	0.0231426
	1640317_at	FBgn0004050	z	0.192431	2.19519	2.26329	0.0461652	0.719451	-3.74395	0.0231135
	1637054_s_at	FBgn0051719	RluA-1	0.273098	3.83475	2.2626	0.0462201	0.719451	-3.74494	0.0230912
	1629277_at	FBgn0051475	CG31475	0.325056	1.78445	2.26252	0.046226	0.719451	-3.74505	0.0230888
	1640618_at	FBgn0035138	CG13884	0.243176	3.42119	2.26222	0.04625	0.719451	-3.74548	0.023079
	1640644_at	FBgn0038746	Surf6	-0.176675	1.32322	-2.26168	0.0462932	0.719451	-3.74626	0.0230616
	1636603_a_at	FBgn0038181	CG9297	0.171318	8.49337	2.26155	0.046303	0.719451	-3.74643	0.0230576
	1630042_at	FBgn0264386	Ca-alpha1T	0.285651	1.42836	2.26069	0.046372	0.719451	-3.74767	0.0230298
	1628199_at	FBgn0040928	CR15345	0.223698	0.278285	2.26037	0.0463976	0.719451	-3.74813	0.0230194
	1632818_at	FBgn0052281	CG32281	0.26035	2.64491	2.26011	0.0464181	0.719451	-3.7485	0.0230112
	1634124_at	FBgn0050428	CG30428	0.273355	3.52506	2.25974	0.0464476	0.719451	-3.74902	0.0229993
	1633174_at	FBgn0003525	stg	-0.189626	0.0929014	-2.25962	0.0464576	0.719451	-3.7492	0.0229953
	1638260_s_at	FBgn0033484	CG2269	0.193886	4.4045	2.25906	0.046502	0.719451	-3.75	0.0229774
	1627507_at	FBgn0026570	CG5704	0.20953	1.13278	2.25862	0.0465372	0.719451	-3.75063	0.0229633
	1634601_at	FBgn0037583	CG9684	0.220711	2.99976	2.25819	0.0465721	0.719451	-3.75125	0.0229494
	1625620_a_at	FBgn0264270	Sxl	0.345388	2.17005	2.258	0.0465873	0.719451	-3.75152	0.0229433
	1633763_at	FBgn0031458	aph-1	0.217721	3.3389	2.25761	0.0466187	0.719451	-3.75208	0.0229307
	1633556_s_at	FBgn0020493	Dad	0.222143	3.97521	2.25758	0.046621	0.719451	-3.75212	0.0229298
	1625481_a_at	FBgn0004795	retn	0.191169	2.99204	2.25748	0.0466291	0.719451	-3.75227	0.0229266
	1641747_s_at	FBgn0033010	Atf6	0.169648	4.1516	2.25739	0.0466358	0.719451	-3.75239	0.0229239
	1628492_at	FBgn0000109	Aprt	-0.223177	3.33416	-2.25729	0.0466443	0.719451	-3.75254	0.0229205
	1638131_s_at	FBgn0004168	5-HT1A	0.230566	0.901467	2.25666	0.0466946	0.719451	-3.75343	0.0229005
	1629217_at	FBgn0266916	Cenp-C	0.20325	1.22207	2.25599	0.0467483	0.719451	-3.75439	0.0228791
	1630299_at	FBgn0040993	CG17325	-0.289812	4.47572	-2.25482	0.0468425	0.719451	-3.75606	0.0228417
	1630299_at	FBgn0259201	CG42305	-0.289812	4.47572	-2.25482	0.0468425	0.719451	-3.75606	0.0228417
	1634086_a_at	FBgn0005632	faf	0.247364	2.43427	2.25441	0.0468756	0.719451	-3.75665	0.0228286
	1631087_a_at	FBgn0037248	srl	0.177734	0.470139	2.25433	0.0468821	0.719451	-3.75676	0.022826
	1631087_a_at	FBgn0037248	srl	0.177734	0.470139	2.25433	0.0468821	0.719451	-3.75676	0.022826
	1639317_at	FBgn0039728	CG7896	0.325082	0.677539	2.25417	0.046895	0.719451	-3.75699	0.022821
	1638049_at	FBgn0263077	CG43340	0.324035	1.48737	2.25385	0.0469207	0.719451	-3.75745	0.0228108
	1640043_s_at	FBgn0051687	CG31687	0.206446	4.64712	2.25314	0.0469783	0.719665	-3.75847	0.0227881
	1640043_s_at	FBgn0263355	CG31688	0.206446	4.64712	2.25314	0.0469783	0.719665	-3.75847	0.0227881
	1636759_at	FBgn0034143	CG8303	0.193788	2.89137	2.25227	0.0470486	0.719665	-3.75971	0.0227605
	1641685_at	FBgn0036735	Edc3	-0.235671	2.61453	-2.25118	0.0471369	0.720292	-3.76127	0.0227258
	1627933_a_at	FBgn0050361	mtt	0.329544	0.874276	2.24937	0.047284	0.720292	-3.76385	0.0226684
	1636265_s_at	FBgn0003502	Btk29A	0.180754	2.63236	2.24813	0.0473847	0.720292	-3.76562	0.0226293
	1639539_at	FBgn0015034	Cyp4e1	0.208801	3.88765	2.24751	0.0474358	0.720292	-3.76652	0.0226095
	1634142_at	FBgn0039453	CG6403	0.21629	0.232663	2.24524	0.0476211	0.720292	-3.76975	0.022538
	1630422_at	FBgn0036796	CG18231	0.194759	4.73217	2.24464	0.0476699	0.720292	-3.77061	0.0225193
	1637897_at	FBgn0025455	CycT	0.206917	4.10628	2.24425	0.0477021	0.720292	-3.77117	0.022507
	1629384_at	FBgn0039654	Brd8	0.187071	0.502792	2.24421	0.0477055	0.720292	-3.77123	0.0225057
	1636995_at	FBgn0030984	tgy	0.291238	1.11764	2.24254	0.0478423	0.720292	-3.7736	0.0224534
	1636829_at	FBgn0051902	Spn28Da	0.233228	3.98596	2.24204	0.0478834	0.720292	-3.77432	0.0224378
	1640409_at	FBgn0024179	wit	0.211395	3.21315	2.24175	0.0479075	0.720292	-3.77473	0.0224286
	1641541_a_at	FBgn0039969	Fis1	0.188254	7.15594	2.24161	0.0479189	0.720292	-3.77493	0.0224243
	1626892_at	FBgn0086251	del	0.435568	1.89632	2.24071	0.0479935	0.720292	-3.77622	0.022396
	1632099_s_at	FBgn0046704	Liprin-alpha	0.216398	2.49736	2.23968	0.0480787	0.720292	-3.7777	0.0223638
	1640906_at	FBgn0052523	CG32523	0.438868	1.48046	2.23936	0.048105	0.720292	-3.77815	0.0223538
	1641071_at	FBgn0040502	CG8343	0.229225	7.08637	2.23913	0.0481243	0.720292	-3.77848	0.0223466
	1629839_a_at	FBgn0004921	Ggamma1	0.263046	4.61622	2.23827	0.048195	0.720292	-3.7797	0.02232
	1626232_at	FBgn0259234	Camta	0.257289	3.11592	2.23821	0.0481999	0.720292	-3.77979	0.0223181
	1634451_at	FBgn0029822	CG12236	-0.205038	0.278216	-2.23788	0.0482276	0.720292	-3.78026	0.0223077
	1632517_at	FBgn0038115	CG7966	0.363833	5.25349	2.23764	0.048247	0.720292	-3.7806	0.0223004
	1636096_at	FBgn0030710	CG8924	0.226839	0.825871	2.23742	0.0482653	0.720292	-3.78091	0.0222936
	1624284_a_at	FBgn0263198	Acn	0.202356	3.1142	2.23626	0.0483615	0.720292	-3.78257	0.0222575
	1639728_at	FBgn0038401	CG5916	-0.177112	0.852819	-2.2355	0.0484252	0.720292	-3.78366	0.0222338
	1640952_at	FBgn0030027	CG1632	0.242814	1.35984	2.23446	0.0485116	0.720292	-3.78514	0.0222017
	1641615_at	FBgn0040601	CG13643	0.217562	0.384781	2.23352	0.0485902	0.720292	-3.78648	0.0221725
	1632424_at	FBgn0031770	CG13995	0.20917	1.4377	2.23266	0.0486616	0.720292	-3.7877	0.0221461
	1640398_at	FBgn0263873	sick	0.178386	-0.0404198	2.23233	0.0486897	0.720292	-3.78818	0.0221357
	1631182_at	FBgn0031472	CG2983	-0.291806	1.99366	-2.23188	0.0487275	0.720292	-3.78882	0.0221218
	1630982_at	FBgn0034814	CG9890	0.233679	1.14638	2.23178	0.048736	0.720292	-3.78897	0.0221186
	1627529_at	FBgn0052726	CG32726	0.330223	1.68008	2.23137	0.0487701	0.720292	-3.78955	0.0221061
	1628986_at	FBgn0266580	Gp210	-0.214826	1.93063	-2.2289	0.0489771	0.720292	-3.79306	0.0220302
	1629130_at	FBgn0261015	Pif1A	0.197777	3.62099	2.22884	0.0489824	0.720292	-3.79315	0.0220283
	1628265_a_at	FBgn0260657	CG42540	0.321694	3.07251	2.22853	0.0490085	0.720292	-3.7936	0.0220188
	1627948_at	FBgn0261854	aPKC	0.185306	4.04078	2.22842	0.0490175	0.720292	-3.79375	0.0220155
	1627430_at	FBgn0033679	CG8888	-0.197924	2.63121	-2.22824	0.0490326	0.720292	-3.794	0.02201
	1641352_at	FBgn0038889	Fancm	-0.325158	2.00523	-2.22817	0.0490386	0.720292	-3.7941	0.0220078
	1628408_at	FBgn0054041	CG34041	0.326884	3.10978	2.22704	0.049134	0.720292	-3.79572	0.0219731
	1631682_at	FBgn0003900	twi	0.250022	1.33745	2.22675	0.0491587	0.720292	-3.79613	0.0219642
	1635429_at	FBgn0053095	CG33095	0.204936	4.66218	2.22663	0.0491682	0.720292	-3.7963	0.0219607
	1637492_at	FBgn0010425	epsilonTry	-0.261543	8.11507	-2.22599	0.0492224	0.720292	-3.79721	0.0219411
	1623957_s_at	FBgn0010226	GstS1	0.210787	8.12625	2.22519	0.0492905	0.720292	-3.79836	0.0219165
	1624838_a_at	FBgn0032840	sNPF	0.335505	1.97683	2.22519	0.0492908	0.720292	-3.79836	0.0219164
	1630912_at	FBgn0039698	CG7789	-0.224534	2.34992	-2.22454	0.0493458	0.720292	-3.79929	0.0218966
	1637705_at	FBgn0005427	ewg	-0.192338	2.25499	-2.22429	0.0493665	0.720292	-3.79963	0.0218891
	1623742_at	FBgn0039013	CG4813	0.180326	0.841354	2.22425	0.0493697	0.720292	-3.79969	0.021888
	1635037_at	FBgn0035986	CG4022	0.295937	2.27853	2.22404	0.0493876	0.720292	-3.79999	0.0218815
	1631004_s_at	FBgn0003567	su(Hw)	0.223193	2.03262	2.22348	0.0494355	0.720292	-3.80079	0.0218643
	1637390_at	FBgn0023545	PIG-K	-0.218496	3.84939	-2.22309	0.0494689	0.720292	-3.80135	0.0218523
	1641537_s_at	FBgn0024330	MED6	0.331057	2.55164	2.22254	0.0495152	0.720292	-3.80213	0.0218357
	1635439_at	FBgn0035727	CG10063	0.169398	4.45971	2.22212	0.0495511	0.720292	-3.80273	0.0218229
	1628355_at	FBgn0052379	CG32379	0.271785	0.776549	2.22187	0.0495725	0.720292	-3.80309	0.0218153
	1639110_at	FBgn0035968	Slc45-1	0.172129	4.77757	2.22084	0.0496596	0.720292	-3.80454	0.0217842
	1633605_at	FBgn0036889	CG14100	-0.21323	0.682087	-2.22028	0.0497081	0.720292	-3.80535	0.021767
	1637270_at	FBgn0053517	Dop2R	-0.178459	0.110555	-2.21997	0.0497346	0.720292	-3.8058	0.0217576
	1637270_at	FBgn0053517	Dop2R	-0.178459	0.110555	-2.21997	0.0497346	0.720292	-3.8058	0.0217576
	1630624_s_at	FBgn0033960	CG10151	0.258411	1.36261	2.21995	0.0497358	0.720292	-3.80582	0.0217571
	1637516_at	FBgn0031146	CG15449	0.305704	1.61268	2.21966	0.0497609	0.720292	-3.80624	0.0217482
	1636353_s_at	FBgn0037612	CG8112	-0.173866	2.48992	-2.21865	0.0498467	0.720292	-3.80766	0.0217178
	1629999_at	FBgn0261610	CG42699	-0.212038	0.407901	-2.21819	0.0498862	0.720292	-3.80832	0.0217039
	1640736_at	FBgn0030314	CG11696	-0.16953	5.18879	-2.21805	0.0498981	0.720292	-3.80852	0.0216997
	1633607_at	FBgn0030326	CG2444	0.463235	1.37681	2.21747	0.0499483	0.720292	-3.80935	0.021682
	1635205_at	FBgn0037446	Zif	0.205607	4.59571	2.21657	0.0500254	0.720292	-3.81063	0.0216549
	1624449_at	FBgn0085376	CG34347	-0.199173	0.103601	-2.21609	0.0500667	0.720292	-3.81131	0.0216404
	1637422_at	FBgn0031538	CG3246	0.19121	4.8683	2.215	0.0501601	0.720292	-3.81286	0.0216077
	1640738_a_at	FBgn0003479	spn-A	-0.181326	1.511	-2.21445	0.0502074	0.720292	-3.81364	0.0215912
	1639396_s_at	FBgn0039774	CDase	-0.191132	2.6474	-2.21427	0.0502228	0.720292	-3.8139	0.0215858
	1629824_at	FBgn0032804	CG13081	0.184761	-0.0183372	2.21403	0.0502436	0.720292	-3.81424	0.0215786
	1634561_s_at	FBgn0052675	Tango5	0.180643	3.82923	2.21376	0.0502673	0.720292	-3.81463	0.0215703
	1631330_at	FBgn0036008	CG3408	0.337539	3.66376	2.21293	0.0503389	0.720292	-3.81581	0.0215454
	1626832_at	FBgn0013278	Hsp70Bb	-0.222666	6.57333	-2.21273	0.0503565	0.720292	-3.8161	0.0215393
	1626832_at	FBgn0013278	Hsp70Bb	-0.222666	6.57333	-2.21273	0.0503565	0.720292	-3.8161	0.0215393
	1626832_at	FBgn0051343	CG31343	-0.222666	6.57333	-2.21273	0.0503565	0.720292	-3.8161	0.0215393
	1638596_at	FBgn0000022	ac	-0.173772	-0.0907958	-2.21223	0.0503995	0.720292	-3.81681	0.0215244
	1639349_at	FBgn0030864	CG8173	0.254018	1.32143	2.21206	0.0504142	0.720292	-3.81705	0.0215193
	1630780_a_at	FBgn0031128	hydra	0.236077	7.28041	2.21202	0.0504172	0.720292	-3.8171	0.0215183
	1633861_at	FBgn0037617	nom	0.293055	1.72932	2.21165	0.0504498	0.720292	-3.81764	0.021507
	1640684_at	FBgn0039228	CG6980	0.209568	4.47282	2.21118	0.0504903	0.720292	-3.8183	0.021493
	1632291_at	FBgn0250791	alphaSnap	0.202831	5.23499	2.21052	0.0505473	0.720292	-3.81924	0.0214733
	1632291_at	FBgn0250791	alphaSnap	0.202831	5.23499	2.21052	0.0505473	0.720292	-3.81924	0.0214733
	1627096_s_at	FBgn0266129	lov	-0.188255	0.679276	-2.21021	0.050574	0.720292	-3.81967	0.0214641
	1627096_s_at	FBgn0266129	lov	-0.188255	0.679276	-2.21021	0.050574	0.720292	-3.81967	0.0214641
	1629928_a_at	FBgn0052141	saturn	0.251405	5.19524	2.20982	0.0506077	0.720292	-3.82023	0.0214525
	1629492_s_at	FBgn0051626	CG31626	0.239048	1.32341	2.20887	0.0506907	0.720292	-3.82159	0.021424
	1623875_at	FBgn0036000	CG3434	0.28048	1.26073	2.20822	0.0507471	0.720292	-3.82251	0.0214047
	1639357_at	FBgn0035141	Cypl	0.226033	1.54807	2.20736	0.0508226	0.720292	-3.82374	0.0213789
	1634737_at	FBgn0038427	ema	0.198584	2.44174	2.20726	0.0508307	0.720292	-3.82387	0.0213762
	1630636_s_at	FBgn0030328	Amun	0.216345	4.74721	2.20715	0.0508407	0.720292	-3.82403	0.0213728
	1628841_at	FBgn0051522	CG31522	0.198889	0.0105416	2.20607	0.0509344	0.720292	-3.82556	0.0213409
	1635711_s_at	FBgn0011747	Ank	0.176326	6.09905	2.20592	0.050948	0.720292	-3.82578	0.0213362
	1631074_at	FBgn0034084	CG8435	0.196155	1.5636	2.20588	0.0509514	0.720292	-3.82584	0.0213351
	1634681_a_at	FBgn0031758	Ucp4B	-0.233668	2.60777	-2.20522	0.0510087	0.720292	-3.82677	0.0213156
	1634095_at	FBgn0028737	eEF1beta	-0.189282	8.09758	-2.20505	0.0510236	0.720292	-3.82701	0.0213106
	1635630_a_at	FBgn0003475	spir	0.201326	3.57334	2.205	0.0510283	0.720292	-3.82709	0.021309
	1639278_at	FBgn0028738	ETH	0.304071	1.59094	2.20449	0.0510731	0.720292	-3.82781	0.0212938
	1634079_at	FBgn0052568	CG32568	0.218466	4.75413	2.20434	0.0510859	0.720292	-3.82802	0.0212895
	1636161_at	FBgn0035153	ebd1	-0.273339	1.59301	-2.20261	0.0512374	0.720292	-3.83048	0.0212384
	1631045_a_at	FBgn0037978	KLHL18	0.279586	3.16663	2.20237	0.0512588	0.720292	-3.83082	0.0212312
	1640410_at	FBgn0053459	CG33459	0.2441	0.246524	2.20135	0.051349	0.720292	-3.83228	0.021201
	1638587_at	FBgn0003733	tor	-0.179278	0.359769	-2.20068	0.0514076	0.720292	-3.83322	0.0211814
	1637403_at	FBgn0028533	CG7953	-0.202529	7.86203	-2.19797	0.0516475	0.720292	-3.83708	0.0211016
	1636094_at	FBgn0035799	CG14838	0.18327	1.88236	2.19769	0.0516719	0.720292	-3.83747	0.0210935
	1629798_at	FBgn0263980	CG43729	0.174995	3.51325	2.19765	0.051675	0.720292	-3.83752	0.0210925
	1630343_at	FBgn0027521	CG3679	0.189904	0.158197	2.19737	0.0517003	0.720292	-3.83793	0.0210841
	1624365_at	FBgn0034308	CG10915	-0.171711	2.27746	-2.19713	0.0517213	0.720292	-3.83826	0.0210772
	1634731_at	FBgn0033397	Cyp4p3	-0.172331	3.88178	-2.19704	0.051729	0.720292	-3.83839	0.0210746
	1637513_at	FBgn0034706	CG11275	-0.202675	4.0102	-2.19692	0.0517402	0.720292	-3.83857	0.0210709
	1636617_a_at	FBgn0053513	Nmdar2	-0.197849	0.318031	-2.1965	0.0517771	0.720292	-3.83916	0.0210587
	1637282_at	FBgn0026737	CG6171	0.304618	2.57817	2.19635	0.0517904	0.720292	-3.83937	0.0210544
	1639768_at	FBgn0031268	cold	-0.214497	2.97462	-2.19605	0.0518177	0.720292	-3.83981	0.0210454
	1629473_at	FBgn0004876	cdi	0.213365	3.7184	2.19538	0.0518771	0.720292	-3.84075	0.0210258
	1626599_at	FBgn0263774	CG43691	0.228278	1.75877	2.19482	0.0519264	0.720292	-3.84154	0.0210096
	1628396_at	FBgn0262562	CG43102	0.209062	0.271459	2.19478	0.0519305	0.720292	-3.84161	0.0210083
	1628428_at	FBgn0025373	Fpps	0.217997	4.54454	2.19316	0.0520747	0.720292	-3.8439	0.0209611
	1632935_at	FBgn0035699	CG13300	0.239897	0.604181	2.19254	0.0521304	0.720292	-3.84479	0.020943
	1623919_a_at	FBgn0038476	kuk	0.183276	5.61155	2.19186	0.0521905	0.720292	-3.84574	0.0209234
	1631844_at	FBgn0039157	Myo95E	0.203035	2.7194	2.1879	0.0525456	0.720292	-3.85136	0.0208087
	1640556_at	FBgn0037485	CG14606	-0.292574	1.49968	-2.18784	0.0525511	0.720292	-3.85144	0.0208069
	1623944_at	FBgn0035481	CG12605	0.325841	1.43923	2.18761	0.0525721	0.720292	-3.85177	0.0208002
	1639909_at	FBgn0030961	CG7058	0.223003	1.03476	2.18732	0.0525985	0.720292	-3.85219	0.0207917
	1641702_at	FBgn0032369	CG6614	0.196056	2.75456	2.18679	0.0526458	0.720292	-3.85293	0.0207766
	1623294_at	FBgn0034352	CG17669	0.266355	2.697	2.18573	0.0527414	0.720292	-3.85444	0.020746
	1623124_at	FBgn0035689	CG7376	0.185099	1.57764	2.1854	0.0527716	0.720292	-3.85491	0.0207364
	1632278_s_at	FBgn0261564	ReepA	0.192044	4.13765	2.18533	0.0527778	0.720292	-3.85501	0.0207344
	1633986_at	FBgn0038815	CG5466	-0.236049	1.62977	-2.1853	0.0527808	0.720292	-3.85505	0.0207335
	1634658_a_at	FBgn0261625	GLS	0.181829	5.67614	2.18466	0.0528383	0.720292	-3.85596	0.0207152
	1625759_at	FBgn0041627	Ku80	0.250332	2.2151	2.18357	0.052937	0.720292	-3.8575	0.0206839
	1635560_at	FBgn0032285	CG17108	0.242237	4.00211	2.18349	0.0529447	0.720292	-3.85762	0.0206814
	1635560_at	FBgn0058263	MFS17	0.242237	4.00211	2.18349	0.0529447	0.720292	-3.85762	0.0206814
	1638997_at	FBgn0050342	Prp38	0.215886	1.62949	2.18299	0.05299	0.720292	-3.85833	0.0206671
	1638808_at	FBgn0024980	Syx4	0.276933	2.80268	2.18252	0.0530326	0.720292	-3.85899	0.0206536
	1622962_a_at	FBgn0031500	CG17221	-0.249002	3.02582	-2.18197	0.0530827	0.720292	-3.85978	0.0206378
	1627446_at	FBgn0265416	Neto	0.18834	0.756792	2.18167	0.0531099	0.720292	-3.8602	0.0206293
	1641012_at	FBgn0015300	Ssl	0.293063	4.12767	2.18105	0.0531657	0.720292	-3.86107	0.0206117
	1633115_a_at	FBgn0259228	C3G	0.191682	4.36554	2.17951	0.0533064	0.720292	-3.86326	0.0205676
	1639029_at	FBgn0002715	mei-S332	0.217611	3.9801	2.1795	0.0533074	0.720292	-3.86327	0.0205673
	1628667_at	FBgn0037877	CG6689	-0.176408	2.17358	-2.17859	0.0533901	0.720292	-3.86455	0.0205415
	1626807_a_at	FBgn0028703	Nhe3	0.194867	3.91457	2.17857	0.0533926	0.720292	-3.86459	0.0205407
	1631082_at	FBgn0004587	B52	-0.215178	0.545461	-2.17834	0.0534132	0.720292	-3.86491	0.0205343
	1626255_at	FBgn0035167	Gr61a	0.233084	0.333034	2.17813	0.053433	0.720292	-3.86522	0.0205281
	1627257_at	FBgn0038763	PIG-L	0.201949	3.6479	2.17782	0.0534607	0.720292	-3.86565	0.0205195
	1628601_at	FBgn0004380	Klp64D	0.213459	1.93642	2.17637	0.0535936	0.720292	-3.8677	0.0204782
	1637339_at	FBgn0039007	CCAP	-0.228353	0.514591	-2.17596	0.0536315	0.720292	-3.86829	0.0204665
	1629325_at	FBgn0262730	dtn	0.188259	4.93861	2.17541	0.0536815	0.720292	-3.86906	0.020451
	1638557_at	FBgn0085440	Lgr4	-0.214198	0.126654	-2.17465	0.0537513	0.720292	-3.87013	0.0204295
	1638449_at	FBgn0259234	Camta	-0.221746	0.139703	-2.17437	0.0537771	0.720292	-3.87053	0.0204216
	1636264_at	FBgn0270928	VAChT	0.22291	3.14477	2.17402	0.0538096	0.720292	-3.87103	0.0204116
	1627944_a_at	FBgn0035318	CG9018	0.19945	2.06569	2.1733	0.0538756	0.720292	-3.87204	0.0203913
	1623746_a_at	FBgn0032447	PICK1	0.226342	3.15783	2.17287	0.0539156	0.720292	-3.87266	0.0203791
	1629100_at	FBgn0040892	CG14634	-0.189674	0.878182	-2.17272	0.0539296	0.720292	-3.87287	0.0203748
	1628262_a_at	FBgn0004606	zfh1	0.305662	1.8563	2.17219	0.0539785	0.720292	-3.87362	0.0203598
	1623073_s_at	FBgn0011760	ctp	0.188501	7.3536	2.17199	0.0539972	0.720292	-3.87391	0.0203541
	1637963_at	FBgn0030981	CG14191	-0.195739	0.817883	-2.17196	0.054	0.720292	-3.87395	0.0203533
	1627970_at	FBgn0022787	Hel89B	0.213074	3.17472	2.17192	0.0540037	0.720292	-3.87401	0.0203521
	1630429_s_at	FBgn0039308	CG11889	-0.271001	5.69931	-2.1714	0.0540518	0.720292	-3.87474	0.0203375
	1630429_s_at	FBgn0039309	CG11891	-0.271001	5.69931	-2.1714	0.0540518	0.720292	-3.87474	0.0203375
	1641463_at	FBgn0032420	CG6583	0.192918	3.00475	2.17087	0.0541003	0.720292	-3.87549	0.0203227
	1632021_at	FBgn0033980	Cyp6a20	-0.367552	5.28331	-2.17048	0.0541362	0.720292	-3.87603	0.0203118
	1641650_at	FBgn0261393	alpha-Est5	-0.173094	3.53131	-2.16904	0.0542698	0.720292	-3.87807	0.0202712
	1636154_at	FBgn0050090	CG30090	0.321247	2.55719	2.16861	0.0543105	0.720292	-3.87869	0.0202589
	1624541_at	FBgn0031118	RhoGAP19D	0.233014	3.06628	2.16858	0.054313	0.720292	-3.87873	0.0202582
	1638563_at	FBgn0039431	plum	-0.223352	0.836653	-2.16849	0.054321	0.720292	-3.87885	0.0202557
	1638563_at	FBgn0039431	plum	-0.223352	0.836653	-2.16849	0.054321	0.720292	-3.87885	0.0202557
	1635186_at	FBgn0036341	Syx13	0.184326	3.79701	2.16841	0.0543286	0.720292	-3.87897	0.0202535
	1633738_at	FBgn0052255	Gr64f	0.330841	0.294804	2.16828	0.0543408	0.720292	-3.87915	0.0202498
	1631859_at	FBgn0259714	DIP-epsilon	0.214876	0.215338	2.16749	0.0544139	0.720292	-3.88027	0.0202277
	1637787_a_at	FBgn0033897	Rcd1	0.190489	3.44167	2.16573	0.0545779	0.720292	-3.88275	0.0201785
	1635378_at	FBgn0037098	Wnk	0.175779	3.65428	2.16543	0.0546059	0.720292	-3.88318	0.0201701
	1628628_at	FBgn0012051	CalpA	0.21566	1.49588	2.16533	0.0546156	0.720292	-3.88332	0.0201672
	1636798_at	FBgn0036419	CG13482	-0.220915	6.36307	-2.16435	0.0547074	0.720292	-3.88471	0.0201398
	1627670_at	FBgn0042126	CG18788	0.204584	0.355212	2.16385	0.0547544	0.720292	-3.88542	0.0201258
	1634878_at	FBgn0040730	CG15127	0.196099	1.25477	2.16377	0.0547617	0.720292	-3.88553	0.0201236
	1632134_s_at	FBgn0026597	Axn	0.197604	2.84131	2.16376	0.0547626	0.720292	-3.88555	0.0201233
	1630306_at	FBgn0035528	CG15012	-0.174232	5.06371	-2.16331	0.0548047	0.720292	-3.88618	0.0201108
	1639203_at	FBgn0263258	chas	0.178944	3.62194	2.16323	0.0548125	0.720292	-3.8863	0.0201085
	1637906_at	FBgn0262606	lncRNA:CR43132	0.231209	1.02894	2.16232	0.054897	0.720292	-3.88757	0.0200834
	1635559_at	FBgn0263980	CG43729	0.18025	0.599759	2.16127	0.0549959	0.720292	-3.88906	0.0200541
	1632983_s_at	FBgn0013576	mtd	0.238143	1.30384	2.16098	0.0550237	0.720292	-3.88948	0.0200459
	1634998_at	FBgn0038161	CG9269	0.170905	0.0976512	2.16076	0.0550445	0.720292	-3.88979	0.0200398
	1629324_at	FBgn0032652	CG6870	0.462446	3.30799	2.16065	0.055054	0.720292	-3.88993	0.020037
	1641646_at	FBgn0039172	Spase22-23	-0.197794	0.358796	-2.16056	0.0550626	0.720292	-3.89006	0.0200345
	1640960_at	FBgn0039773	CG2224	0.213348	3.70072	2.16045	0.0550735	0.720292	-3.89023	0.0200313
	1634062_at	FBgn0031031	CG14218	-0.186464	0.00456979	-2.15961	0.0551521	0.720292	-3.89141	0.0200081
	1626300_at	FBgn0031098	CG17068	-0.304062	2.26692	-2.15921	0.05519	0.720292	-3.89197	0.019997
	1632377_at	FBgn0034067	CG8399	-0.202706	2.45009	-2.15869	0.0552394	0.720292	-3.89271	0.0199825
	1625652_s_at	FBgn0039543	CG12428	0.262886	3.6252	2.15829	0.0552772	0.720292	-3.89328	0.0199715
	1625413_s_at	FBgn0053490	CG33490	0.262296	4.32526	2.15588	0.0555049	0.720292	-3.89668	0.0199051
	1630921_at	FBgn0087007	bbg	0.182215	0.506931	2.1558	0.0555129	0.720292	-3.89679	0.0199027
	1623247_at	FBgn0039296	Sil1	0.307929	1.91553	2.15578	0.0555146	0.720292	-3.89682	0.0199023
	1641398_s_at	FBgn0034657	LBR	-0.211087	0.735842	-2.15511	0.0555786	0.720292	-3.89777	0.0198837
	1631370_at	FBgn0050026	CG30026	0.231179	2.43512	2.15502	0.0555865	0.720292	-3.89789	0.0198814
	1631602_at	FBgn0037388	CG14676	0.181305	4.5573	2.15402	0.0556815	0.720292	-3.8993	0.0198539
	1626729_at	FBgn0034938	CG3803	-0.243365	2.47335	-2.15401	0.0556827	0.720292	-3.89932	0.0198536
	1631549_s_at	FBgn0033836	CG18278	-0.23784	1.49806	-2.15262	0.0558152	0.720292	-3.90128	0.0198154
	1631549_s_at	FBgn0260475	CG30059	-0.23784	1.49806	-2.15262	0.0558152	0.720292	-3.90128	0.0198154
	1635848_at	FBgn0025885	Inos	0.192527	6.29859	2.1524	0.0558363	0.720292	-3.90159	0.0198093
	1624144_at	FBgn0034942	CG13566	0.189571	0.193993	2.15215	0.0558602	0.720292	-3.90195	0.0198025
	1635965_at	FBgn0037431	CG17917	-0.179882	3.20386	-2.15168	0.0559046	0.720292	-3.9026	0.0197897
	1629635_at	FBgn0037376	Hat1	-0.205298	-0.0140535	-2.15167	0.0559058	0.720292	-3.90262	0.0197894
	1624039_at	FBgn0035702	CG10147	0.224614	0.771733	2.15118	0.0559524	0.720292	-3.90331	0.019776
	1641164_s_at	FBgn0025693	ZnT41F	0.192675	3.39974	2.1511	0.0559601	0.720292	-3.90342	0.0197738
	1641164_s_at	FBgn0025693	ZnT41F	0.192675	3.39974	2.1511	0.0559601	0.720292	-3.90342	0.0197738
	1626383_at	FBgn0029791	CG4096	0.216608	0.717514	2.15104	0.0559657	0.720292	-3.90351	0.0197722
	1633733_a_at	FBgn0004648	svr	-0.248931	1.18626	-2.15021	0.0560458	0.720292	-3.90469	0.0197493
	1637494_at	FBgn0023527	CG3071	0.204519	1.59081	2.15004	0.0560613	0.720292	-3.90492	0.0197449
	1628643_at	FBgn0051267	CG31267	-0.256389	3.38915	-2.14991	0.0560745	0.720292	-3.90511	0.0197412
	1631149_s_at	FBgn0011638	La	0.245353	2.88243	2.14989	0.0560765	0.720292	-3.90514	0.0197406
	1639913_at	FBgn0005775	Con	0.217432	2.99041	2.14974	0.0560909	0.720292	-3.90535	0.0197365
	1625992_s_at	FBgn0085442	NKAIN	0.167347	2.56071	2.1497	0.056094	0.720292	-3.9054	0.0197356
	1636580_at	FBgn0037276	CG17387	0.18575	2.82412	2.14929	0.0561336	0.720292	-3.90598	0.0197244
	1641678_at	FBgn0262871	lute	0.192833	2.80816	2.14826	0.0562327	0.720292	-3.90744	0.0196962
	1628701_a_at	FBgn0029588	CG14798	0.195941	0.130106	2.14779	0.0562776	0.720292	-3.9081	0.0196835
	1630487_s_at	FBgn0001223	Hsp22	-0.20552	5.51501	-2.14761	0.056295	0.720292	-3.90835	0.0196785
	1630487_s_at	FBgn0001228	CG4456	-0.20552	5.51501	-2.14761	0.056295	0.720292	-3.90835	0.0196785
	1635307_at	FBgn0038735	CG4662	0.333088	2.42671	2.14744	0.0563114	0.720292	-3.90859	0.0196739
	1626178_s_at	FBgn0036518	RhoGAP71E	0.194267	4.01165	2.14725	0.05633	0.720292	-3.90886	0.0196686
	1636470_at	FBgn0054026	CG34026	-0.171875	6.73598	-2.14663	0.0563889	0.720292	-3.90973	0.019652
	1636862_at	FBgn0031856	CG11322	0.390008	2.52083	2.14655	0.0563969	0.720292	-3.90985	0.0196498
	1626727_at	FBgn0023549	Mct1	0.191574	2.14074	2.14653	0.0563985	0.720292	-3.90987	0.0196493
	1626319_a_at	FBgn0053470	CG33470	-0.414396	5.12228	-2.14498	0.0565483	0.720292	-3.91206	0.0196072
	1626319_a_at	FBgn0283462	IMPPP	-0.414396	5.12228	-2.14498	0.0565483	0.720292	-3.91206	0.0196072
	1632231_a_at	FBgn0026059	Mhcl	0.211694	3.24112	2.14482	0.0565636	0.720292	-3.91228	0.0196028
	1632309_at	FBgn0061469	Ube3a	0.185618	4.53937	2.14478	0.056568	0.720292	-3.91235	0.0196016
	1623207_at	FBgn0035033	CG3548	-0.281932	1.0082	-2.1446	0.0565849	0.720292	-3.91259	0.0195969
	1625306_at	FBgn0261613	Oaz	0.165519	0.0793483	2.14443	0.0566012	0.720292	-3.91283	0.0195923
	1630809_at	FBgn0267430	Pzl	0.203334	0.0652781	2.14433	0.0566115	0.720292	-3.91298	0.0195894
	1628995_at	FBgn0035857	CG8006	0.194959	4.32503	2.14388	0.0566551	0.720292	-3.91362	0.0195772
	1634529_at	FBgn0283480	Alp2	-0.19948	4.62046	-2.1438	0.0566624	0.720292	-3.91372	0.0195752
	1641576_a_at	FBgn0038344	obe	0.234917	0.989814	2.14371	0.0566715	0.720292	-3.91386	0.0195726
	1628941_at	FBgn0265726	Nna1	0.17412	4.86214	2.14291	0.0567483	0.720292	-3.91497	0.0195512
	1628941_at	FBgn0265726	Nna1	0.17412	4.86214	2.14291	0.0567483	0.720292	-3.91497	0.0195512
	1638387_at	FBgn0041702	CG15107	0.233533	2.85079	2.14282	0.0567577	0.720292	-3.91511	0.0195486
	1624672_at	FBgn0264908	pHCl-1	-0.216151	-0.0041589	-2.14271	0.0567683	0.720292	-3.91527	0.0195456
	1632100_s_at	FBgn0003410	sina	0.205613	2.73699	2.14262	0.0567771	0.720292	-3.91539	0.0195431
	1631068_a_at	FBgn0029728	CG2861	0.264081	1.19812	2.14257	0.0567812	0.720292	-3.91545	0.019542
	1641063_s_at	FBgn0032123	Oatp30B	0.178637	4.45638	2.14075	0.0569582	0.721655	-3.91802	0.0194928
	1636454_at	FBgn0038890	CG7956	-0.200347	1.52477	-2.14068	0.0569647	0.721655	-3.91812	0.019491
	1637197_at	FBgn0004374	neb	0.179359	2.95843	2.14029	0.0570032	0.721659	-3.91867	0.0194804
	1628038_at	FBgn0034998	CG13577	0.20721	3.02286	2.13727	0.0572971	0.723448	-3.92292	0.0193995
	1632497_a_at	FBgn0010825	Gug	0.179578	4.76109	2.13396	0.0576224	0.727071	-3.92759	0.0193108
	1640867_s_at	FBgn0010389	htl	0.190159	1.8469	2.13233	0.0577822	0.727522	-3.92988	0.0192676
	1635089_at	FBgn0265991	Zasp52	-0.252356	2.43215	-2.13233	0.0577825	0.727522	-3.92988	0.0192675
	1638803_at	FBgn0014024	Rnp4F	0.197532	3.41026	2.13162	0.0578528	0.727522	-3.93088	0.0192485
	1624982_s_at	FBgn0031313	CG5080	0.251557	5.46186	2.13117	0.0578965	0.727522	-3.93151	0.0192368
	1639719_at	FBgn0005648	Pabp2	0.198757	1.55754	2.13111	0.057903	0.727522	-3.9316	0.019235
	1636726_at	FBgn0035140	CG17180	0.251369	1.46579	2.13101	0.057913	0.727522	-3.93174	0.0192323
	1622894_at	FBgn0034454	CG15120	0.465086	1.98376	2.1301	0.0580025	0.727989	-3.93302	0.0192083
	1623909_s_at	FBgn0001269	inv	0.269841	0.413743	2.12659	0.0583507	0.731391	-3.93795	0.0191155
	1636558_a_at	FBgn0000014	abd-A	-0.204175	0.308326	-2.12563	0.0584465	0.731861	-3.93931	0.0190902
	1628693_at	FBgn0031596	CG15429	0.215685	3.44819	2.12544	0.0584655	0.731861	-3.93957	0.0190852
	1626351_at	FBgn0033137	Tsp42Ep	0.203856	0.546122	2.12461	0.0585487	0.732419	-3.94075	0.0190632
	1626157_at	FBgn0263219	Dscam4	-0.215766	0.0126796	-2.12292	0.0587169	0.734039	-3.94311	0.019019
	1627464_at	FBgn0002569	Mal-A2	-0.178456	5.83888	-2.12227	0.0587824	0.734231	-3.94403	0.0190019
	1641566_s_at	FBgn0036816	Indy	0.202506	7.58637	2.1216	0.0588494	0.734231	-3.94497	0.0189844
	1640796_a_at	FBgn0031119	CG1812	0.303877	2.01168	2.12096	0.058914	0.734231	-3.94588	0.0189676
	1635712_at	FBgn0030320	CG2247	0.181555	2.79287	2.12053	0.0589573	0.734231	-3.94648	0.0189563
	1634264_at	FBgn0033623	CG13202	0.179549	3.21569	2.12039	0.0589712	0.734231	-3.94668	0.0189527
	1627614_at	FBgn0015371	chn	0.20418	3.27508	2.11958	0.0590522	0.734231	-3.94781	0.0189316
	1637437_at	FBgn0037794	CG6254	0.235786	0.557343	2.11923	0.0590874	0.734231	-3.9483	0.0189225
	1628351_at	FBgn0029503	CHORD	-0.17368	2.36128	-2.11889	0.0591221	0.734231	-3.94878	0.0189136
	1632888_s_at	FBgn0051687	CG31687	0.242709	1.31571	2.11713	0.0592993	0.734231	-3.95125	0.0188678
	1632888_s_at	FBgn0263355	CG31688	0.242709	1.31571	2.11713	0.0592993	0.734231	-3.95125	0.0188678
	1627757_at	FBgn0264005	Hmx	0.218531	0.439866	2.11674	0.0593388	0.734231	-3.9518	0.0188577
	1639019_s_at	FBgn0053470	CG33470	-0.519387	6.17503	-2.11582	0.0594323	0.734231	-3.9531	0.0188337
	1639019_s_at	FBgn0283462	IMPPP	-0.519387	6.17503	-2.11582	0.0594323	0.734231	-3.9531	0.0188337
	1630333_at	FBgn0033867	Cpr50Ca	-0.216649	0.189107	-2.11551	0.0594629	0.734231	-3.95352	0.0188258
	1638887_a_at	FBgn0034728	rad50	0.266958	1.58336	2.11543	0.0594714	0.734231	-3.95364	0.0188237
	1639576_at	FBgn0004381	Klp68D	-0.170077	2.97157	-2.11532	0.0594827	0.734231	-3.95379	0.0188208
	1633281_at	FBgn0260658	CG42541	0.439818	2.33367	2.11484	0.0595308	0.734231	-3.95446	0.0188085
	1641043_at	FBgn0035824	CG8281	-0.279876	0.950172	-2.11477	0.0595379	0.734231	-3.95456	0.0188066
	1632680_at	FBgn0001970	Pgant35A	0.227175	1.42531	2.11465	0.0595506	0.734231	-3.95473	0.0188034
	1630372_s_at	FBgn0000286	Cf2	0.309202	2.68474	2.11459	0.0595566	0.734231	-3.95482	0.0188019
	1640750_at	FBgn0261671	tweek	0.249782	3.73634	2.11396	0.0596206	0.734231	-3.9557	0.0187855
	1638377_x_at	FBgn0010358	deltaTry	-0.440378	5.42457	-2.11389	0.0596271	0.734231	-3.95579	0.0187839
	1638377_x_at	FBgn0010359	gammaTry	-0.440378	5.42457	-2.11389	0.0596271	0.734231	-3.95579	0.0187839
	1638377_x_at	FBgn0050025	CG30025	-0.440378	5.42457	-2.11389	0.0596271	0.734231	-3.95579	0.0187839
	1638377_x_at	FBgn0050031	CG30031	-0.440378	5.42457	-2.11389	0.0596271	0.734231	-3.95579	0.0187839
	1638377_x_at	FBgn0262739	AGO1	-0.440378	5.42457	-2.11389	0.0596271	0.734231	-3.95579	0.0187839
	1637463_a_at	FBgn0264975	Nrg	0.193326	4.77406	2.1137	0.0596473	0.734231	-3.95607	0.0187788
	1638702_a_at	FBgn0033749	achi	0.22164	0.455648	2.1134	0.0596775	0.734231	-3.95649	0.0187711
	1633480_at	FBgn0036463	Reck	0.199136	1.09173	2.11273	0.0597453	0.734231	-3.95742	0.0187538
	1641157_at	FBgn0033421	CG1888	0.183216	2.59846	2.11184	0.0598358	0.734231	-3.95867	0.0187309
	1631631_at	FBgn0033602	Cpr47Ee	0.177373	3.19211	2.1118	0.0598406	0.734231	-3.95874	0.0187297
	1635713_at	FBgn0033661	CG13185	0.242033	0.969263	2.11132	0.0598887	0.734231	-3.9594	0.0187175
	1633515_s_at	FBgn0041171	ago	0.171587	4.62947	2.11121	0.0599002	0.734231	-3.95956	0.0187146
	1635322_a_at	FBgn0033784	SCCRO3	0.186122	4.84864	2.11105	0.0599167	0.734231	-3.95978	0.0187105
	1637041_a_at	FBgn0031514	OtopLb	0.228091	1.88806	2.10991	0.0600334	0.734401	-3.96139	0.018681
	1639825_at	FBgn0000346	comt	0.17462	5.79936	2.10983	0.0600414	0.734401	-3.9615	0.018679
	1638440_at	FBgn0259822	Ca-beta	0.207242	0.305974	2.10955	0.0600698	0.734401	-3.96189	0.0186719
	1633143_s_at	FBgn0027101	Dyrk3	0.23209	3.38836	2.10923	0.0601022	0.734401	-3.96233	0.0186638
	1628543_a_at	FBgn0000636	Fas3	0.365619	2.52993	2.10883	0.0601431	0.734428	-3.96289	0.0186535
	1636954_at	FBgn0015774	NetB	0.208356	2.23189	2.1076	0.0602698	0.735068	-3.96463	0.0186218
	1641200_at	FBgn0011281	Obp83a	-0.390795	4.73405	-2.10718	0.0603128	0.735068	-3.96521	0.0186111
	1625755_at	FBgn0035401	Alg2	0.205312	3.06714	2.10631	0.0604026	0.735068	-3.96644	0.0185887
	1638198_at	FBgn0037206	CG12768	0.19462	0.14675	2.10584	0.060451	0.735068	-3.9671	0.0185767
	1632566_at	FBgn0039818	CG11318	0.220799	0.449016	2.1057	0.060465	0.735068	-3.96729	0.0185732
	1641673_at	FBgn0027495	Smyd4-4	0.193508	2.94672	2.1054	0.0604956	0.735068	-3.96771	0.0185656
	1625112_at	FBgn0011715	Snr1	0.217073	2.62355	2.10501	0.0605358	0.735068	-3.96825	0.0185556
	1640365_s_at	FBgn0031702	fusl	0.233363	5.70858	2.10493	0.0605446	0.735068	-3.96837	0.0185534
	1636513_a_at	FBgn0266557	kis	0.180243	5.24656	2.1042	0.0606196	0.735359	-3.96939	0.0185349
	1627070_x_at	FBgn0030940	CG15040	0.356205	2.38442	2.10334	0.0607086	0.735359	-3.9706	0.0185129
	1631698_s_at	FBgn0026147	TTLL4A	0.271302	1.59636	2.1024	0.0608053	0.735359	-3.97191	0.0184891
	1632809_at	FBgn0033250	CG14762	-0.17358	4.76337	-2.10239	0.0608064	0.735359	-3.97193	0.0184888
	1624713_at	FBgn0085400	side-V	0.208307	0.569685	2.10173	0.0608745	0.735359	-3.97285	0.0184721
	1637538_s_at	FBgn0034618	CG9485	0.198225	6.39688	2.10145	0.0609036	0.735359	-3.97324	0.018465
	1630771_s_at	FBgn0002031	l(2)37Cc	-0.163391	5.92564	-2.10118	0.060932	0.735359	-3.97362	0.018458
	1626591_at	FBgn0026179	siz	0.169886	4.81441	2.10084	0.0609674	0.735359	-3.9741	0.0184494
	1628799_at	FBgn0052311	zormin	0.198777	0.604702	2.10075	0.0609764	0.735359	-3.97422	0.0184472
	1628564_at	FBgn0044011	Spn43Ad	-0.225336	1.46115	-2.10033	0.0610195	0.735359	-3.97481	0.0184367
	1624126_at	FBgn0039663	CG2321	0.210411	0.454053	2.09964	0.061092	0.735359	-3.97578	0.018419
	1638322_at	FBgn0039087	CG10168	0.187745	0.256792	2.09859	0.0612013	0.735359	-3.97725	0.0183924
	1632904_at	FBgn0031868	Rat1	0.238193	1.12989	2.09756	0.0613085	0.735359	-3.97869	0.0183664
	1630492_at	FBgn0261109	mrn	0.183049	3.21168	2.09697	0.06137	0.735359	-3.97952	0.0183515
	1636112_s_at	FBgn0250819	CG33521	0.205975	5.93421	2.09695	0.0613723	0.735359	-3.97955	0.018351
	1634722_s_at	FBgn0262732	mbf1	0.168844	6.22263	2.09688	0.0613796	0.735359	-3.97965	0.0183492
	1623579_at	FBgn0053773	CG33773	0.29504	2.4788	2.09684	0.0613834	0.735359	-3.9797	0.0183483
	1626894_at	FBgn0261611	CG42700	0.267289	1.24441	2.09638	0.0614318	0.735474	-3.98035	0.0183366
	1639858_s_at	FBgn0026369	Sara	-0.194686	3.08904	-2.09576	0.0614958	0.735776	-3.98121	0.0183212
	1636812_at	FBgn0035715	CG10103	0.176468	4.12871	2.09486	0.0615903	0.735977	-3.98247	0.0182985
	1634408_at	FBgn0033971	CG10209	0.241941	2.63844	2.09314	0.0617703	0.736344	-3.98487	0.0182554
	1638854_s_at	FBgn0261674	CG42709	0.176836	4.22301	2.09313	0.0617717	0.736344	-3.98489	0.018255
	1637896_at	FBgn0013811	Dhc62B	0.203833	1.318	2.09308	0.0617769	0.736344	-3.98496	0.0182538
	1629838_at	FBgn0034129	Parp16	0.184834	4.73429	2.09239	0.06185	0.736344	-3.98593	0.0182364
	1635423_s_at	FBgn0001218	Hsc70-3	0.169194	7.36371	2.09232	0.0618568	0.736344	-3.98602	0.0182347
	1627828_s_at	FBgn0031055	et	0.201568	3.87491	2.09206	0.0618842	0.736344	-3.98639	0.0182282
	1627828_s_at	FBgn0085344	CG34315	0.201568	3.87491	2.09206	0.0618842	0.736344	-3.98639	0.0182282
	1641669_a_at	FBgn0036915	Prp3	0.17696	2.99545	2.09104	0.0619919	0.736512	-3.98782	0.0182026
	1635070_at	FBgn0035726	CG9953	0.166919	6.08616	2.09027	0.0620726	0.736512	-3.98889	0.0181835
	1623065_at	FBgn0031254	CG13692	-0.233143	0.260896	-2.09001	0.0621005	0.736512	-3.98926	0.0181769
	1623404_at	FBgn0028932	CG16890	0.271483	1.85929	2.09	0.0621015	0.736512	-3.98927	0.0181767
	1638492_at	FBgn0264272	mwh	0.188022	0.368125	2.08795	0.0623186	0.738625	-3.99214	0.0181255
	1638669_at	FBgn0034200	Gbp2	0.190454	5.81429	2.08721	0.0623968	0.73909	-3.99317	0.0181072
	1628258_at	FBgn0027578	Nepl21	0.229294	4.99409	2.08596	0.062529	0.740194	-3.99492	0.0180762
	1629538_s_at	FBgn0047000	CG33946	0.190407	4.78549	2.08547	0.0625816	0.740354	-3.99561	0.018064
	1634307_at	FBgn0030685	Graf	0.180141	5.43874	2.085	0.0626314	0.740481	-3.99626	0.0180524
	1640790_at	FBgn0265052	St3	0.254501	1.004	2.08246	0.0629017	0.742517	-3.9998	0.0179897
	1637356_a_at	FBgn0026427	Su(var)2-HP2	0.233943	1.64607	2.08141	0.0630145	0.742517	-4.00128	0.0179637
	1639878_at	FBgn0040666	CG12848	0.169745	4.5453	2.08106	0.0630521	0.742517	-4.00177	0.017955
	1641156_at	FBgn0053516	dpr3	0.20451	0.673677	2.08048	0.0631137	0.742517	-4.00257	0.0179409
	1634106_at	FBgn0040551	CG11686	-0.158399	4.80286	-2.07929	0.0632418	0.742517	-4.00423	0.0179116
	1631618_s_at	FBgn0030208	PPP4R2r	0.284523	2.51276	2.07907	0.0632658	0.742517	-4.00455	0.0179061
	1640831_at	FBgn0035505	Teh2	0.190176	1.35513	2.07838	0.0633399	0.742517	-4.00551	0.0178892
	1624971_at	FBgn0040383	CG5254	-0.191499	4.9289	-2.07816	0.0633632	0.742517	-4.00581	0.0178838
	1635400_at	FBgn0023090	dtr	0.231754	4.51679	2.07698	0.0634901	0.742517	-4.00746	0.017855
	1641292_at	FBgn0052834	CG32834	0.184102	0.0485032	2.07636	0.0635573	0.742517	-4.00833	0.0178398
	1634387_at	FBgn0037829	CG14691	0.188772	1.89511	2.07606	0.0635893	0.742517	-4.00874	0.0178325
	1638658_at	FBgn0044871	Gos28	0.19827	3.01445	2.07604	0.0635916	0.742517	-4.00877	0.017832
	1636262_at	FBgn0036005	pall	0.249938	2.05059	2.07565	0.063634	0.742517	-4.00932	0.0178224
	1635471_at	FBgn0036527	CG7304	-0.189205	1.79874	-2.07552	0.0636477	0.742517	-4.00949	0.0178193
	1626742_at	FBgn0267728	otk2	0.205502	0.388327	2.07452	0.0637555	0.742517	-4.01089	0.017795
	1635961_at	FBgn0260499	qvr	0.180409	4.68675	2.07422	0.0637888	0.742517	-4.01131	0.0177875
	1634724_at	FBgn0038968	CG12499	-0.185414	0.487521	-2.07333	0.0638851	0.742517	-4.01255	0.0177658
	1633735_a_at	FBgn0033474	CG1407	0.333333	2.1743	2.07264	0.0639593	0.742517	-4.01351	0.0177492
	1627342_at	FBgn0263216	CG43386	0.269121	0.360005	2.07252	0.0639733	0.742517	-4.01369	0.017746
	1641072_at	FBgn0037327	PEK	0.24005	2.25789	2.0722	0.0640076	0.742517	-4.01413	0.0177384
	1624151_a_at	FBgn0052183	Ccn	0.218718	2.00623	2.07192	0.0640382	0.742517	-4.01452	0.0177315
	1640218_at	FBgn0039368	CG17196	0.210417	4.85129	2.07148	0.0640855	0.742517	-4.01513	0.017721
	1628246_at	FBgn0038156	side-IV	0.250673	0.349671	2.0705	0.0641924	0.742517	-4.0165	0.0176972
	1635805_at	FBgn0034703	CG3045	0.201845	0.875281	2.06995	0.0642525	0.742517	-4.01727	0.0176838
	1639461_a_at	FBgn0010051	Itp-r83A	0.20404	2.43079	2.06971	0.0642785	0.742517	-4.0176	0.017678
	1637449_at	FBgn0085450	Snoo	-0.174421	0.224266	-2.06964	0.0642857	0.742517	-4.01769	0.0176764
	1633832_a_at	FBgn0259175	ome	-0.178377	-0.00370592	-2.06947	0.0643046	0.742517	-4.01793	0.0176722
	1638343_at	FBgn0035359	CG1143	0.181577	3.43998	2.06934	0.064319	0.742517	-4.01811	0.017669
	1636678_at	FBgn0259229	CG42329	0.203983	0.278421	2.06832	0.0644298	0.742517	-4.01953	0.0176445
	1630155_at	FBgn0031111	Obp19c	-0.183184	-0.0794596	-2.0668	0.0645963	0.742517	-4.02165	0.0176078
	1626472_at	FBgn0050340	CG30340	-0.220929	0.205675	-2.06675	0.0646023	0.742517	-4.02172	0.0176065
	1627646_at	FBgn0260392	CG42518	-0.158302	4.58211	-2.06653	0.0646263	0.742517	-4.02203	0.0176012
	1627646_at	FBgn0260401	MED9	-0.158302	4.58211	-2.06653	0.0646263	0.742517	-4.02203	0.0176012
	1635063_at	FBgn0016978	snRNP-U1-70K	0.162651	3.12565	2.06574	0.0647134	0.742517	-4.02314	0.0175821
	1629070_at	FBgn0037386	CG1208	-0.177892	4.89891	-2.0653	0.0647617	0.742517	-4.02375	0.0175715
	1636936_at	FBgn0259926	CG42449	-0.172615	0.177859	-2.0651	0.0647836	0.742517	-4.02403	0.0175667
	1626552_at	FBgn0029710	CG3568	0.257316	2.64347	2.064	0.0649045	0.742517	-4.02556	0.0175403
	1625071_a_at	FBgn0002773	Mlc2	0.220832	8.6807	2.06359	0.0649492	0.742517	-4.02612	0.0175306
	1631356_at	FBgn0261872	scaf6	0.213908	1.58987	2.0631	0.0650036	0.742517	-4.02681	0.0175187
	1633336_at	FBgn0261570	CG42684	0.217576	2.77819	2.06303	0.065011	0.742517	-4.0269	0.0175171
	1627785_at	FBgn0033135	Tsp42En	0.253007	1.75425	2.06295	0.0650197	0.742517	-4.02701	0.0175152
	1640309_s_at	FBgn0010280	Taf4	0.24624	3.27436	2.06281	0.0650355	0.742517	-4.02721	0.0175118
	1631467_at	FBgn0030247	CG15208	0.168674	5.65119	2.0626	0.0650586	0.742517	-4.0275	0.0175068
	1636939_at	FBgn0032728	Tango6	0.197874	0.737645	2.06218	0.0651043	0.742517	-4.02808	0.0174969
	1632889_at	FBgn0038282	dpr9	0.326832	2.40097	2.06199	0.0651253	0.742517	-4.02835	0.0174923
	1627101_at	FBgn0041094	scyl	0.171683	6.34031	2.06154	0.065176	0.742517	-4.02898	0.0174814
	1638128_at	FBgn0050280	CG30280	-0.153628	0.0840429	-2.06091	0.0652449	0.742517	-4.02985	0.0174664
	1630800_s_at	FBgn0054040	CG34040	-0.1995	5.67317	-2.06085	0.0652513	0.742517	-4.02993	0.0174651
	1636505_at	FBgn0034399	CG15083	-0.174258	4.64798	-2.06024	0.0653194	0.742517	-4.03079	0.0174504
	1634148_at	FBgn0036620	CG4842	-0.343432	2.68075	-2.06007	0.0653386	0.742517	-4.03103	0.0174463
	1636533_at	FBgn0034217	Lhr	-0.316136	1.22925	-2.06003	0.0653424	0.742517	-4.03108	0.0174454
	1628935_at	FBgn0030073	CG10962	0.275658	1.57403	2.05915	0.0654406	0.742517	-4.03231	0.0174243
	1634824_a_at	FBgn0029941	CG1677	0.174798	3.41325	2.05882	0.0654768	0.742517	-4.03276	0.0174165
	1636415_at	FBgn0031055	et	0.281203	0.420142	2.05876	0.0654838	0.742517	-4.03285	0.017415
	1632755_at	FBgn0051266	CG31266	-0.180276	2.55385	-2.05819	0.065547	0.742517	-4.03365	0.0174015
	1626455_s_at	FBgn0054005	CG34005	-0.275697	0.508362	-2.05817	0.0655491	0.742517	-4.03367	0.0174011
	1631271_a_at	FBgn0026575	hang	0.183378	3.56502	2.05633	0.0657537	0.742517	-4.03623	0.0173574
	1629161_at	FBgn0043533	Obp56f	0.188724	7.10575	2.05615	0.0657739	0.742517	-4.03648	0.0173531
	1639440_at	FBgn0035611	CG13285	0.23802	1.53011	2.05593	0.0657979	0.742517	-4.03678	0.017348
	1627156_at	FBgn0053225	CG33225	0.318331	2.36568	2.0558	0.0658131	0.742517	-4.03697	0.0173447
	1624619_s_at	FBgn0028864	CG18477	-0.300214	1.84066	-2.05545	0.065852	0.742517	-4.03745	0.0173365
	1624619_s_at	FBgn0051780	CG31780	-0.300214	1.84066	-2.05545	0.065852	0.742517	-4.03745	0.0173365
	1625584_at	FBgn0034479	CG8654	0.173407	5.75957	2.05524	0.0658754	0.742517	-4.03775	0.0173315
	1623950_s_at	FBgn0000071	Ama	0.221566	0.264559	2.05487	0.0659161	0.742517	-4.03825	0.0173229
	1633731_at	FBgn0011737	Wee1	0.202799	4.98246	2.05415	0.0659973	0.742517	-4.03926	0.0173057
	1633731_at	FBgn0011737	Wee1	0.202799	4.98246	2.05415	0.0659973	0.742517	-4.03926	0.0173057
	1641244_at	FBgn0011297	Alg3	0.209914	1.76713	2.05383	0.0660333	0.742517	-4.03971	0.0172981
	1627829_at	FBgn0003249	Rh3	0.313434	4.8386	2.05356	0.0660634	0.742517	-4.04009	0.0172917
	1631473_at	FBgn0053170	CG33170	-0.16721	3.37236	-2.05305	0.0661205	0.742517	-4.04079	0.0172797
	1633060_at	FBgn0033696	Cyp6g2	-0.276102	1.40741	-2.05223	0.0662121	0.742517	-4.04193	0.0172604
	1633440_a_at	FBgn0032812	Hakai	0.203433	1.56068	2.05142	0.066303	0.742517	-4.04306	0.0172413
	1632515_a_at	FBgn0032202	REPTOR-BP	-0.275517	4.67304	-2.05118	0.0663297	0.742517	-4.04338	0.0172357
	1624237_at	FBgn0034400	CG15099	0.181768	3.84974	2.05116	0.0663324	0.742517	-4.04342	0.0172352
	1639013_at	FBgn0036579	CG5027	0.177819	3.42555	2.05066	0.0663879	0.742517	-4.04411	0.0172235
	1631005_at	FBgn0040795	CG13038	0.210535	0.530109	2.05049	0.0664075	0.742517	-4.04435	0.0172194
	1636971_at	FBgn0033861	CG12464	0.216496	4.9758	2.05034	0.0664247	0.742517	-4.04456	0.0172158
	1634966_a_at	FBgn0010774	Ref1	0.170809	2.96204	2.05003	0.0664594	0.742517	-4.04499	0.0172086
	1639983_at	FBgn0085319	CG34290	0.254693	0.192881	2.04957	0.0665114	0.742517	-4.04563	0.0171977
	1638984_s_at	FBgn0037525	CG17816	0.346086	2.52693	2.04846	0.066636	0.742517	-4.04716	0.0171718
	1639613_at	FBgn0003391	shg	0.298065	0.73159	2.04828	0.0666564	0.742517	-4.04742	0.0171676
	1622980_at	FBgn0261119	Prp19	0.200093	2.61186	2.04826	0.0666591	0.742517	-4.04745	0.017167
	1637993_at	FBgn0036811	MED11	0.213574	1.81887	2.04782	0.0667085	0.742517	-4.04806	0.0171568
	1641608_at	FBgn0027568	Cand1	0.165697	4.71052	2.04765	0.0667273	0.742517	-4.04829	0.0171529
	1638005_s_at	FBgn0016070	smg	0.300905	2.46505	2.04686	0.0668171	0.742517	-4.04939	0.0171343
	1637428_a_at	FBgn0262614	pyd	0.183853	5.24035	2.04629	0.0668815	0.742517	-4.05018	0.017121
	1623094_at	FBgn0033130	Tsp42Ei	0.167067	3.78882	2.04625	0.0668862	0.742517	-4.05024	0.01712
	1633340_at	FBgn0035290	dsb	0.204798	0.453945	2.04619	0.0668929	0.742517	-4.05032	0.0171187
	1628617_at	FBgn0052282	Drsl4	-0.198	8.52869	-2.04547	0.0669746	0.742517	-4.05132	0.0171018
	1641219_at	FBgn0034540	Lrt	-0.185556	0.173901	-2.04547	0.0669747	0.742517	-4.05132	0.0171018
	1623432_s_at	FBgn0025740	PlexB	0.209769	1.44841	2.04535	0.0669882	0.742517	-4.05149	0.017099
	1624929_at	FBgn0051710	CG31710	0.223632	2.14799	2.04428	0.0671095	0.742517	-4.05297	0.0170741
	1628801_at	FBgn0001324	kto	0.266856	3.59892	2.04395	0.0671467	0.742517	-4.05343	0.0170665
	1631109_at	FBgn0034853	Ice1	0.216598	0.973065	2.04312	0.067241	0.742517	-4.05458	0.0170472
	1630573_at	FBgn0035538	DopEcR	0.204825	2.86851	2.04311	0.0672426	0.742517	-4.0546	0.0170469
	1630573_at	FBgn0267390	dop	0.204825	2.86851	2.04311	0.0672426	0.742517	-4.0546	0.0170469
	1628591_at	FBgn0038007	Cyp313a3	0.223167	0.541761	2.04311	0.0672428	0.742517	-4.0546	0.0170468
	1632629_a_at	FBgn0029663	CG10804	0.21343	1.91044	2.04269	0.0672905	0.742517	-4.05518	0.0170371
	1634453_at	FBgn0041709	yellow-g	0.177969	2.48789	2.04207	0.0673614	0.742517	-4.05604	0.0170226
	1636614_a_at	FBgn0040068	Vav	0.207202	1.71033	2.04196	0.0673735	0.742517	-4.05619	0.0170202
	1627167_a_at	FBgn0069973	CG40485	0.243334	2.13208	2.0416	0.0674149	0.742517	-4.05669	0.0170117
	1638225_a_at	FBgn0027106	Inx7	-0.212851	3.51066	-2.04154	0.0674219	0.742517	-4.05678	0.0170103
	1641377_a_at	FBgn0016047	nompA	-0.190104	0.398867	-2.04153	0.0674226	0.742517	-4.05679	0.0170102
	1639476_at	FBgn0030262	Vago	0.197538	2.92066	2.04088	0.0674963	0.742517	-4.05768	0.0169952
	1629845_at	FBgn0085404	CG34375	-0.18318	0.0869171	-2.04026	0.067568	0.742517	-4.05855	0.0169807
	1638211_at	FBgn0034264	Dlish	0.213685	0.540783	2.04012	0.0675834	0.742517	-4.05874	0.0169776
	1640460_at	FBgn0036500	CG7275	-0.225662	2.27166	-2.03991	0.0676081	0.742517	-4.05904	0.0169726
	1633033_s_at	FBgn0039915	Gat	0.195523	3.21542	2.03961	0.0676414	0.742517	-4.05944	0.0169658
	1636656_at	FBgn0036804	Sgf11	0.228648	2.4592	2.03933	0.0676737	0.742517	-4.05983	0.0169593
	1625015_at	FBgn0045442	mthl12	-0.157137	-0.119753	-2.03906	0.0677051	0.742517	-4.06021	0.016953
	1638509_at	FBgn0259178	5PtaseI	0.197614	1.3054	2.03834	0.0677873	0.742517	-4.06121	0.0169364
	1634677_at	FBgn0083981	RunxA	-0.190756	0.0255977	-2.03821	0.0678025	0.742517	-4.06139	0.0169333
	1628947_s_at	FBgn0002778	mnd	-0.207488	3.04495	-2.03782	0.067847	0.742517	-4.06193	0.0169244
	1636465_at	FBgn0030659	CG9215	0.263264	1.50837	2.03777	0.0678527	0.742517	-4.062	0.0169233
	1624271_at	FBgn0034000	CG11808	0.200475	1.9215	2.03754	0.0678798	0.742517	-4.06233	0.0169178
	1633778_at	FBgn0039487	gb	0.199623	3.33521	2.0372	0.067918	0.742517	-4.06279	0.0169101
	1640044_at	FBgn0032271	CG7329	0.227765	3.15487	2.03705	0.067936	0.742517	-4.06301	0.0169065
	1637118_at	FBgn0050010	CG30010	0.224911	2.2244	2.03645	0.0680048	0.742782	-4.06383	0.0168928
	1626064_at	FBgn0259818	CG42399	0.171357	0.827239	2.03615	0.0680387	0.742782	-4.06424	0.016886
	1629718_at	FBgn0038719	CG16727	0.225794	3.52738	2.03476	0.0681991	0.743741	-4.06617	0.016854
	1628893_at	FBgn0037409	Osi24	0.208042	0.276237	2.03471	0.068205	0.743741	-4.06624	0.0168528
	1627408_at	FBgn0052107	CG32107	-0.176069	0.345834	-2.03401	0.0682864	0.744199	-4.06722	0.0168366
	1623351_at	FBgn0023520	CG3857	0.183131	0.565503	2.03193	0.068526	0.745326	-4.07009	0.0167892
	1639481_at	FBgn0032965	CG11629	0.219587	2.00478	2.03181	0.0685401	0.745326	-4.07026	0.0167864
	1630198_at	FBgn0010774	Ref1	0.168212	1.10245	2.03138	0.0685906	0.745326	-4.07086	0.0167764
	1640178_at	FBgn0010774	Ref1	0.156112	5.00708	2.03094	0.0686407	0.745326	-4.07146	0.0167666
	1624558_at	FBgn0052283	Drsl3	-0.227975	0.329744	-2.0306	0.0686809	0.745326	-4.07194	0.0167587
	1630923_at	FBgn0036476	sstn	0.253784	2.7559	2.02989	0.0687636	0.745326	-4.07292	0.0167424
	1628714_at	FBgn0033475	CG12129	0.175174	2.80061	2.02935	0.0688263	0.745326	-4.07367	0.0167302
	1624187_at	FBgn0000928	fs(1)Yb	0.261718	0.355692	2.02857	0.0689167	0.745326	-4.07475	0.0167125
	1635107_at	FBgn0263392	Tet	0.221746	0.343751	2.02851	0.0689234	0.745326	-4.07483	0.0167112
	1628964_at	FBgn0032178	Spn31A	-0.205244	2.67701	-2.02823	0.0689563	0.745326	-4.07522	0.0167048
	1623917_a_at	FBgn0003380	Sh	0.183639	3.38261	2.02779	0.0690079	0.745326	-4.07583	0.0166947
	1631514_at	FBgn0036531	CG6244	0.240983	1.17396	2.02717	0.0690797	0.745326	-4.07668	0.0166807
	1640083_at	FBgn0033460	Sec24AB	0.180726	4.82133	2.02636	0.069175	0.745326	-4.07781	0.0166622
	1640083_at	FBgn0262126	Sec24CD	0.180726	4.82133	2.02636	0.069175	0.745326	-4.07781	0.0166622
	1627684_at	FBgn0038816	Lrrk	0.175462	1.43547	2.02586	0.0692328	0.745326	-4.07849	0.016651
	1639289_at	FBgn0050001	CG30001	0.217277	0.18765	2.02508	0.0693239	0.745326	-4.07957	0.0166334
	1625472_at	FBgn0039648	CG14515	0.182386	0.25348	2.02498	0.0693366	0.745326	-4.07972	0.0166309
	1632410_at	FBgn0035372	CG12093	-0.177321	3.71997	-2.0248	0.0693571	0.745326	-4.07996	0.016627
	1628114_s_at	FBgn0026379	Pten	0.169307	3.75083	2.02428	0.0694183	0.745326	-4.08068	0.0166152
	1637180_at	FBgn0040778	CG17977	0.256569	2.23089	2.02286	0.0695851	0.745326	-4.08265	0.0165831
	1637062_at	FBgn0042102	CG18745	0.248249	1.79314	2.02216	0.0696668	0.745326	-4.08361	0.0165675
	1626323_s_at	FBgn0261710	nocte	0.167682	3.99258	2.02203	0.0696822	0.745326	-4.08379	0.0165645
	1638523_at	FBgn0052633	CG32633	-0.174888	2.58411	-2.02181	0.0697088	0.745326	-4.0841	0.0165594
	1625175_s_at	FBgn0031401	papi	0.178494	6.24865	2.02155	0.0697387	0.745326	-4.08445	0.0165537
	1625947_at	FBgn0033799	GLaz	0.205025	3.97119	2.02153	0.0697417	0.745326	-4.08449	0.0165531
	1635686_at	FBgn0036352	CG14110	0.166399	0.275803	2.02144	0.0697523	0.745326	-4.08461	0.0165511
	1626637_a_at	FBgn0014133	bif	0.169504	4.71827	2.02143	0.0697533	0.745326	-4.08462	0.0165509
	1626905_at	FBgn0033982	Cyp317a1	0.197826	0.411977	2.01981	0.0699438	0.745326	-4.08686	0.0165146
	1633914_at	FBgn0001089	Gal	-0.377086	5.2432	-2.01933	0.0700005	0.745326	-4.08752	0.0165039
	1633346_at	FBgn0036184	PCID2	0.211936	1.98934	2.01922	0.070014	0.745326	-4.08768	0.0165013
	1633422_a_at	FBgn0005630	lola	-0.189339	2.49697	-2.01877	0.0700667	0.745326	-4.08829	0.0164913
	1626444_at	FBgn0003062	Fib	0.152437	3.32547	2.01838	0.0701134	0.745326	-4.08884	0.0164825
	1633582_at	FBgn0263397	Ih	0.166001	5.35682	2.01825	0.0701287	0.745326	-4.08902	0.0164796
	1641545_at	FBgn0086901	cv-c	-0.164191	0.148705	-2.01764	0.0702005	0.745326	-4.08985	0.016466
	1627438_at	FBgn0051084	CR31084	0.156519	0.271288	2.01757	0.0702099	0.745326	-4.08996	0.0164642
	1641138_at	FBgn0032664	Slc25A46b	0.176736	4.90987	2.01541	0.0704663	0.745326	-4.09295	0.016416
	1633696_at	FBgn0020372	TM4SF	0.172376	4.98012	2.0153	0.0704789	0.745326	-4.09309	0.0164137
	1628042_at	FBgn0052488	CG32488	-0.200145	3.87089	-2.01503	0.0705116	0.745326	-4.09347	0.0164075
	1630442_at	FBgn0025645	CG3598	0.221404	0.107041	2.01433	0.070594	0.745326	-4.09443	0.0163921
	1631262_at	FBgn0038315	CG14866	0.163643	0.0207709	2.01427	0.0706018	0.745326	-4.09452	0.0163907
	1628093_at	FBgn0038073	CG14395	0.169532	0.768962	2.01404	0.070629	0.745326	-4.09483	0.0163856
	1626664_at	FBgn0031522	CG3285	0.307319	4.26696	2.01319	0.0707302	0.745326	-4.096	0.0163667
	1629530_at	FBgn0034328	IM23	-0.754835	3.53927	-2.0131	0.0707417	0.745326	-4.09614	0.0163646
	1628390_at	FBgn0261722	fwe	0.186881	5.08435	2.01309	0.0707421	0.745326	-4.09614	0.0163645
	1628616_at	FBgn0031999	CG8419	0.244079	0.946599	2.01272	0.070787	0.745326	-4.09666	0.0163562
	1638483_at	FBgn0029963	CG10920	0.190776	5.03585	2.01246	0.0708176	0.745326	-4.09701	0.0163505
	1630218_at	FBgn0033589	CG13227	-0.165477	0.0822235	-2.01177	0.0709	0.745326	-4.09797	0.0163352
	1623744_at	FBgn0050411	CG30411	0.270737	1.3031	2.01176	0.0709013	0.745326	-4.09798	0.0163349
	1641695_a_at	FBgn0026388	Or46a	-0.19612	-0.0337921	-2.01175	0.0709028	0.745326	-4.098	0.0163347
	1635325_a_at	FBgn0004390	RasGAP1	-0.18452	0.142789	-2.01149	0.0709334	0.745326	-4.09835	0.016329
	1635325_a_at	FBgn0004390	RasGAP1	-0.18452	0.142789	-2.01149	0.0709334	0.745326	-4.09835	0.016329
	1631833_at	FBgn0002781	mod(mdg4)	0.188254	2.40837	2.0112	0.070968	0.745326	-4.09875	0.0163226
	1635148_at	FBgn0037896	ninaG	0.2094	2.05433	2.01048	0.071055	0.745326	-4.09975	0.0163065
	1634468_at	FBgn0014417	CG13397	-0.170836	2.22163	-2.00978	0.0711386	0.745326	-4.10071	0.0162911
	1623138_at	FBgn0260012	pds5	0.191666	3.67936	2.00913	0.0712165	0.745326	-4.10161	0.0162767
	1640391_at	FBgn0000709	fliI	0.197899	2.80923	2.00887	0.0712473	0.745326	-4.10196	0.0162711
	1637938_at	FBgn0032551	CG18636	-0.202027	0.13903	-2.0088	0.0712568	0.745326	-4.10207	0.0162693
	1637107_at	FBgn0036052	CG10809	0.238639	3.17735	2.00865	0.0712744	0.745326	-4.10227	0.0162661
	1641339_at	FBgn0032800	CG10137	0.236203	1.64956	2.00862	0.0712783	0.745326	-4.10232	0.0162654
	1624236_at	FBgn0033439	CG1773	-0.241524	3.84933	-2.00844	0.0712997	0.745326	-4.10256	0.0162615
	1624236_at	FBgn0260474	CG30002	-0.241524	3.84933	-2.00844	0.0712997	0.745326	-4.10256	0.0162615
	1625773_at	FBgn0036970	Spn77Bc	0.166116	8.115	2.00828	0.0713185	0.745326	-4.10278	0.016258
	1629305_at	FBgn0010660	Nup214	0.23461	2.53539	2.00827	0.0713198	0.745326	-4.10279	0.0162578
	1639037_at	FBgn0259742	CG42360	0.184107	4.70955	2.00763	0.0713972	0.745326	-4.10368	0.0162436
	1629313_at	FBgn0030837	CG8661	-0.232194	4.34386	-2.00722	0.071446	0.745326	-4.10424	0.0162347
	1629569_at	FBgn0030555	Fbxl4	0.203564	3.36526	2.00711	0.0714591	0.745326	-4.10439	0.0162323
	1632556_s_at	FBgn0039665	CG2310	0.239671	1.88734	2.00649	0.0715348	0.745326	-4.10525	0.0162185
	1634609_at	FBgn0051111	CG31111	-0.274098	0.955337	-2.00632	0.0715546	0.745326	-4.10548	0.0162149
	1623951_at	FBgn0261871	dpr2	-0.207686	0.328629	-2.00611	0.0715804	0.745326	-4.10577	0.0162102
	1631570_at	FBgn0034545	CG13438	-0.194806	0.00677516	-2.00603	0.0715905	0.745326	-4.10589	0.0162083
	1625307_at	FBgn0028562	sut2	0.193423	0.610471	2.00598	0.0715964	0.745326	-4.10596	0.0162072
	1626720_at	FBgn0054049	CG34049	-0.224788	3.27786	-2.00591	0.0716044	0.745326	-4.10605	0.0162058
	1637478_s_at	FBgn0011224	heph	0.236896	3.54865	2.0059	0.0716057	0.745326	-4.10606	0.0162056
	1630897_at	FBgn0024963	GluClalpha	0.247187	3.2506	2.00561	0.0716405	0.745326	-4.10646	0.0161992
	1635281_at	FBgn0033350	CG8237	0.166456	4.76761	2.00369	0.0718729	0.745522	-4.10911	0.0161571
	1636075_at	FBgn0051453	pch2	0.228575	0.424809	2.00328	0.0719221	0.745522	-4.10967	0.0161482
	1629015_a_at	FBgn0025641	DAAM	0.169857	3.14469	2.0032	0.0719325	0.745522	-4.10978	0.0161463
	1630124_at	FBgn0039560	BOD1	0.295705	0.744383	2.00313	0.0719405	0.745522	-4.10987	0.0161449
	1632574_at	FBgn0037846	CG6574	0.223577	2.77514	2.0029	0.0719684	0.745522	-4.11019	0.0161398
	1638319_at	FBgn0001263	inaD	0.201253	3.9326	2.00242	0.0720267	0.745522	-4.11085	0.0161293
	1640922_a_at	FBgn0004914	Hnf4	0.205513	4.88156	2.00085	0.0722183	0.747097	-4.11302	0.0160949
	1625144_at	FBgn0034704	CG6758	0.187591	2.56763	2.0002	0.0722967	0.747499	-4.11391	0.0160809
	1631706_at	FBgn0033412	CG13955	-0.203737	0.117369	-1.99973	0.0723547	0.747564	-4.11457	0.0160705
	1633684_at	FBgn0043783	CG32444	0.171932	8.54271	1.99894	0.0724513	0.747738	-4.11566	0.0160533
	1631237_s_at	FBgn0032036	CG13384	0.164176	4.21938	1.99872	0.0724777	0.747738	-4.11595	0.0160486
	1639566_s_at	FBgn0023407	B4	0.158597	4.98631	1.99836	0.0725217	0.747738	-4.11645	0.0160408
	1634099_at	FBgn0003218	rdgB	0.167284	5.01144	1.99806	0.0725582	0.747738	-4.11686	0.0160343
	1640484_at	FBgn0031201	CG12446	0.203972	1.31917	1.9968	0.0727131	0.747738	-4.1186	0.0160068
	1633338_at	FBgn0260407	mRpS23	0.239275	3.27499	1.99608	0.0728013	0.747738	-4.11959	0.0159912
	1632183_at	FBgn0003295	ru	0.184554	0.381214	1.99487	0.0729489	0.747738	-4.12125	0.0159652
	1641525_at	FBgn0037626	CG8236	0.164879	5.11099	1.99476	0.0729634	0.747738	-4.12141	0.0159627
	1632067_at	FBgn0262579	Ect4	0.209753	5.53276	1.99467	0.0729733	0.747738	-4.12152	0.015961
	1640808_at	FBgn0034528	CG11180	0.159165	0.541119	1.99459	0.0729832	0.747738	-4.12163	0.0159592
	1638196_at	FBgn0003863	alphaTry	-0.17078	9.60258	-1.99444	0.0730023	0.747738	-4.12184	0.0159559
	1625081_at	FBgn0031498	CG17260	0.261007	3.05921	1.99437	0.0730105	0.747738	-4.12194	0.0159544
	1628767_s_at	FBgn0039923	MED26	0.164349	5.669	1.99421	0.0730299	0.747738	-4.12215	0.015951
	1628207_at	FBgn0034145	CG5065	-0.167135	4.62675	-1.99228	0.0732678	0.749769	-4.12481	0.0159094
	1626780_s_at	FBgn0030778	CG4678	0.192389	2.95355	1.99136	0.0733819	0.750531	-4.12608	0.0158895
	1630657_at	FBgn0028647	CG11902	0.205791	1.7693	1.98955	0.073606	0.751636	-4.12857	0.0158506
	1632837_at	FBgn0030008	CG2129	-0.205198	0.333295	-1.98931	0.0736352	0.751636	-4.12889	0.0158456
	1629340_s_at	FBgn0020645	Lcp65Aa	-0.173217	0.0591018	-1.9892	0.0736486	0.751636	-4.12904	0.0158433
	1632073_at	FBgn0036913	Usp32	0.186506	2.71484	1.98855	0.0737296	0.752057	-4.12994	0.0158293
	1633414_at	FBgn0036274	CG4328	-0.166954	0.0962534	-1.98756	0.0738532	0.75214	-4.13131	0.015808
	1626553_at	FBgn0032702	CG10376	0.159528	3.15258	1.98755	0.0738546	0.75214	-4.13132	0.0158077
	1633784_at	FBgn0037638	CG8379	0.183632	3.81338	1.98753	0.0738567	0.75214	-4.13135	0.0158074
	1633646_at	FBgn0259918	inaF-B	0.170256	6.22175	1.98675	0.0739535	0.752721	-4.13241	0.0157908
	1633646_at	FBgn0260812	inaF-D	0.170256	6.22175	1.98675	0.0739535	0.752721	-4.13241	0.0157908
	1629062_at	FBgn0037016	CG13252	0.171436	4.37868	1.98603	0.0740428	0.752808	-4.1334	0.0157755
	1629025_at	FBgn0243486	rdo	-0.154642	0.363316	-1.98511	0.0741581	0.752808	-4.13467	0.0157558
	1636155_at	FBgn0037326	CG14669	0.181843	0.0296222	1.98495	0.0741784	0.752808	-4.13489	0.0157523
	1640495_at	FBgn0010282	TfIIFalpha	0.168716	2.77303	1.9842	0.0742721	0.752808	-4.13592	0.0157363
	1631215_at	FBgn0264006	dysc	0.258112	0.686684	1.98389	0.0743101	0.752808	-4.13634	0.0157299
	1633234_at	FBgn0031266	Sf3b1	0.210537	2.60141	1.98373	0.0743308	0.752808	-4.13657	0.0157264
	1637085_at	FBgn0013762	Cdk5	0.178495	3.29267	1.98332	0.0743821	0.752808	-4.13713	0.0157176
	1624889_a_at	FBgn0021800	Reph	0.24712	3.45111	1.98267	0.0744636	0.752808	-4.13802	0.0157038
	1637327_at	FBgn0031216	Zir	0.218549	3.19308	1.98265	0.0744657	0.752808	-4.13805	0.0157035
	1639079_at	FBgn0038172	Adgf-D	-0.246082	4.36198	-1.98261	0.0744701	0.752808	-4.13809	0.0157027
	1627376_at	FBgn0014018	Rel	0.199465	4.89322	1.9824	0.0744965	0.752808	-4.13838	0.0156983
	1623624_at	FBgn0038341	AdamTS-A	0.181187	2.98287	1.98198	0.0745499	0.752808	-4.13897	0.0156892
	1623624_at	FBgn0038341	AdamTS-A	0.181187	2.98287	1.98198	0.0745499	0.752808	-4.13897	0.0156892
	1625392_at	FBgn0033480	mRpL42	0.173181	4.72316	1.98131	0.0746338	0.752808	-4.13988	0.0156751
	1639798_at	FBgn0014343	mirr	0.191917	0.512217	1.98108	0.0746624	0.752808	-4.1402	0.0156702
	1632775_at	FBgn0259112	asRNA:CR42254	0.373194	1.21802	1.98056	0.0747272	0.752808	-4.14091	0.0156593
	1639083_at	FBgn0005632	faf	-0.209992	0.555719	-1.98041	0.0747462	0.752808	-4.14111	0.0156561
	1625924_at	FBgn0030071	CG12661	0.176621	1.84784	1.97916	0.0749038	0.752808	-4.14283	0.0156297
	1632803_at	FBgn0024986	CG3719	-0.160042	3.71688	-1.97904	0.0749185	0.752808	-4.14299	0.0156272
	1634090_at	FBgn0264449	CG43867	0.211969	0.269645	1.97866	0.0749664	0.752808	-4.14351	0.0156192
	1627826_s_at	FBgn0033459	CG12744	-0.177552	0.985724	-1.97788	0.0750656	0.752808	-4.14459	0.0156026
	1639982_at	FBgn0030105	CG15369	0.526123	6.13071	1.97765	0.0750944	0.752808	-4.1449	0.0155978
	1632342_a_at	FBgn0053080	CG33080	0.24368	4.98194	1.97737	0.0751302	0.752808	-4.14529	0.0155919
	1628188_at	FBgn0259937	Nop60B	0.156534	0.373517	1.97715	0.075157	0.752808	-4.14558	0.0155874
	1625873_at	FBgn0034605	CG15661	0.371325	1.1514	1.97618	0.0752808	0.752808	-4.14692	0.0155668
	1638206_at	FBgn0050458	CG30458	0.194399	0.240538	1.97596	0.0753084	0.752808	-4.14722	0.0155622
	1626324_at	FBgn0031432	Cyp309a1	0.193518	4.44975	1.97528	0.0753938	0.752808	-4.14815	0.0155481
	1627119_at	FBgn0036022	CG8329	0.264658	5.43337	1.97484	0.0754495	0.752808	-4.14875	0.0155389
	1638844_s_at	FBgn0031589	Naprt	-0.204182	3.81067	-1.97467	0.0754711	0.752808	-4.14898	0.0155353
	1624506_at	FBgn0031653	Jon25Biii	-0.192338	8.4038	-1.97366	0.0755995	0.752808	-4.15037	0.0155141
	1638135_at	FBgn0030034	CG10555	0.251651	1.78407	1.97364	0.0756027	0.752808	-4.1504	0.0155136
	1639296_at	FBgn0031286	CG3862	0.167369	1.27445	1.97309	0.0756718	0.752808	-4.15115	0.0155022
	1626489_s_at	FBgn0036927	Gabat	0.177217	0.756793	1.97295	0.0756902	0.752808	-4.15135	0.0154992
	1630337_at	FBgn0030389	CG15927	-0.177759	0.0793516	-1.97212	0.0757956	0.752808	-4.15248	0.0154819
	1625453_a_at	FBgn0035772	Sh3beta	0.157303	5.37555	1.97169	0.0758502	0.752808	-4.15307	0.015473
	1631093_at	FBgn0039627	CG11837	-0.153694	0.552244	-1.97149	0.0758759	0.752808	-4.15334	0.0154688
	1632857_at	FBgn0050088	CG30088	0.175061	0.0147281	1.97053	0.0759992	0.752808	-4.15467	0.0154486
	1639344_at	FBgn0052651	CG32651	0.209291	3.7266	1.96986	0.0760835	0.752808	-4.15557	0.0154349
	1641631_at	FBgn0026415	Idgf4	-0.16498	0.265428	-1.96968	0.0761075	0.752808	-4.15583	0.015431
	1641631_at	FBgn0036598	CG4982	-0.16498	0.265428	-1.96968	0.0761075	0.752808	-4.15583	0.015431
	1627452_a_at	FBgn0002441	l(3)mbt	0.180064	2.51661	1.96958	0.0761197	0.752808	-4.15596	0.015429
	1624578_at	FBgn0030774	sphe	-0.154623	4.0347	-1.96909	0.0761832	0.752808	-4.15664	0.0154187
	1637682_at	FBgn0265464	Traf6	-0.182485	2.12321	-1.96861	0.0762444	0.752808	-4.15729	0.0154087
	1632807_at	FBgn0040212	Dhap-at	0.165266	3.50293	1.96826	0.0762894	0.752808	-4.15777	0.0154015
	1635743_at	FBgn0015838	Vang	0.178698	1.24169	1.96825	0.0762902	0.752808	-4.15778	0.0154013
	1640543_at	FBgn0031345	CG18132	0.233643	5.31819	1.9682	0.0762967	0.752808	-4.15785	0.0154003
	1631933_at	FBgn0037759	CG8526	-0.202206	0.385921	-1.96805	0.0763162	0.752808	-4.15806	0.0153971
	1628563_at	FBgn0053181	CG33181	-0.179193	3.95283	-1.96793	0.0763317	0.752808	-4.15822	0.0153946
	1625176_at	FBgn0261244	inaE	0.300637	2.66529	1.96755	0.0763801	0.752808	-4.15874	0.0153868
	1624408_at	FBgn0015773	NetA	-0.160746	1.11661	-1.96718	0.0764269	0.752808	-4.15924	0.0153792
	1637714_a_at	FBgn0032536	Ance-3	0.209864	3.028	1.96715	0.0764315	0.752808	-4.15929	0.0153785
	1636820_s_at	FBgn0003486	spo	-0.153947	-0.0848802	-1.96691	0.0764621	0.752808	-4.15961	0.0153735
	1628235_at	FBgn0031942	CG7203	0.159889	9.56976	1.96682	0.0764734	0.752808	-4.15974	0.0153717
	1630612_at	FBgn0025837	CG17636	0.179303	0.676696	1.9667	0.0764892	0.752808	-4.1599	0.0153692
	1631451_at	FBgn0052181	CG32181	0.164297	6.01079	1.96649	0.0765156	0.752808	-4.16018	0.0153649
	1639642_a_at	FBgn0029769	frma	0.200291	2.70697	1.96629	0.0765423	0.752808	-4.16047	0.0153606
	1639642_a_at	FBgn0029769	frma	0.200291	2.70697	1.96629	0.0765423	0.752808	-4.16047	0.0153606
	1626038_at	FBgn0042641	frc	-0.168324	3.74647	-1.96627	0.0765448	0.752808	-4.1605	0.0153602
	1626038_at	FBgn0052174	Coq4	-0.168324	3.74647	-1.96627	0.0765448	0.752808	-4.1605	0.0153602
	1623287_at	FBgn0035267	CG13921	0.167922	0.832903	1.96556	0.076636	0.752808	-4.16146	0.0153456
	1635659_at	FBgn0000377	crn	-0.161743	1.66595	-1.96483	0.0767291	0.752808	-4.16245	0.0153306
	1637936_at	FBgn0052512	CG32512	0.168345	4.078	1.96399	0.0768384	0.752808	-4.16361	0.0153131
	1629702_a_at	FBgn0264442	ab	-0.198001	0.42234	-1.96375	0.0768691	0.752808	-4.16394	0.0153082
	1637953_at	FBgn0030647	CG6324	-0.180576	0.370808	-1.96365	0.0768824	0.752808	-4.16408	0.0153061
	1630366_at	FBgn0261262	CG42613	0.199751	4.68641	1.96321	0.076939	0.752808	-4.16468	0.0152971
	1630366_at	FBgn0263983	CG43732	0.199751	4.68641	1.96321	0.076939	0.752808	-4.16468	0.0152971
	1633693_at	FBgn0265959	rdgC	-0.158448	0.740911	-1.96172	0.0771315	0.752808	-4.16671	0.0152664
	1633693_at	FBgn0265959	rdgC	-0.158448	0.740911	-1.96172	0.0771315	0.752808	-4.16671	0.0152664
	1625990_at	FBgn0037185	CG11367	0.152696	4.18761	1.96161	0.0771453	0.752808	-4.16686	0.0152643
	1625990_at	FBgn0260481	CG32454	0.152696	4.18761	1.96161	0.0771453	0.752808	-4.16686	0.0152643
	1638898_at	FBgn0062449	CG13197	0.157124	4.89798	1.96115	0.0772047	0.752808	-4.16749	0.0152548
	1631701_a_at	FBgn0033725	Cpr49Ac	0.34793	0.869548	1.96104	0.0772199	0.752808	-4.16765	0.0152524
	1624203_s_at	FBgn0001987	Gli	0.203465	3.21932	1.96033	0.077312	0.752808	-4.16862	0.0152378
	1625228_at	FBgn0033911	VGAT	0.28951	1.5214	1.96009	0.077342	0.752808	-4.16893	0.0152331
	1624999_s_at	FBgn0261262	CG42613	-0.175313	0.316659	-1.95972	0.0773902	0.752808	-4.16944	0.0152255
	1632653_at	FBgn0263353	CG11000	0.192079	2.03333	1.95939	0.0774338	0.752808	-4.1699	0.0152186
	1626181_at	FBgn0039690	Gnpnat	-0.182168	0.0112486	-1.95901	0.0774832	0.752808	-4.17042	0.0152108
	1639867_at	FBgn0000533	ea	0.27748	0.957102	1.95876	0.0775161	0.752808	-4.17076	0.0152057
	1635819_at	FBgn0014388	sty	0.204834	3.62936	1.95786	0.0776323	0.752808	-4.17198	0.0151874
	1640127_at	FBgn0036402	CG6650	0.25013	4.58845	1.95703	0.0777402	0.752808	-4.17311	0.0151705
	1638848_at	FBgn0037792	TAF1B	0.186108	0.615227	1.95672	0.0777817	0.752808	-4.17355	0.015164
	1638848_at	FBgn0037792	TAF1B	0.186108	0.615227	1.95672	0.0777817	0.752808	-4.17355	0.015164
	1639608_at	FBgn0031091	Phf7	0.263495	0.958664	1.95624	0.0778442	0.752808	-4.1742	0.0151543
	1636880_s_at	FBgn0041605	cpx	0.192805	7.15313	1.95506	0.0779987	0.752808	-4.17582	0.0151302
	1636356_at	FBgn0034739	CG3927	0.162877	5.92484	1.95501	0.0780045	0.752808	-4.17588	0.0151293
	1625719_at	FBgn0002921	Atpalpha	0.160748	8.33109	1.95489	0.07802	0.752808	-4.17604	0.0151269
	1640970_at	FBgn0034566	CG9313	0.171259	5.51434	1.95469	0.0780467	0.752808	-4.17632	0.0151227
	1637472_at	FBgn0052570	TwdlY	-0.178611	0.293629	-1.9544	0.078085	0.752808	-4.17672	0.0151168
	1628308_at	FBgn0263005	CG43313	-0.158916	-0.0171062	-1.9542	0.0781112	0.752808	-4.17699	0.0151127
	1630122_at	FBgn0039518	CG13978	0.16937	5.3952	1.95407	0.0781279	0.752808	-4.17716	0.0151101
	1629035_at	FBgn0039419	CG12290	0.153619	3.8611	1.95316	0.0782477	0.752808	-4.17841	0.0150916
	1630649_at	FBgn0036324	CG12520	0.209099	0.202754	1.95306	0.0782601	0.752808	-4.17854	0.0150897
	1634009_at	FBgn0086690	Plp	0.15499	4.7681	1.95279	0.0782957	0.752808	-4.17891	0.0150842
	1629187_s_at	FBgn0027492	wdb	-0.237479	1.1808	-1.95243	0.0783427	0.752808	-4.1794	0.0150769
	1634509_s_at	FBgn0004373	fwd	0.175715	5.21846	1.95241	0.0783459	0.752808	-4.17943	0.0150764
	1628842_s_at	FBgn0039928	Cals	0.183254	6.08414	1.95236	0.0783518	0.752808	-4.17949	0.0150755
	1639299_at	FBgn0026754	Ugt37c1	0.167449	0.186308	1.95229	0.0783612	0.752808	-4.17959	0.0150741
	1638080_at	FBgn0039315	CG13658	-0.244133	1.67905	-1.95221	0.0783719	0.752808	-4.1797	0.0150724
	1632500_at	FBgn0035695	CG10226	-0.203056	4.41696	-1.952	0.078399	0.752808	-4.17998	0.0150683
	1638561_x_at	FBgn0011747	Ank	0.162778	0.0946387	1.95198	0.0784017	0.752808	-4.18001	0.0150678
	1639411_at	FBgn0028360	Cdc7	0.148204	5.3945	1.95181	0.0784245	0.752808	-4.18025	0.0150643
	1625775_a_at	FBgn0000382	csw	0.164451	5.17952	1.9506	0.0785832	0.752808	-4.18189	0.0150399
	1624586_a_at	FBgn0041194	Prat2	0.20722	6.88156	1.94945	0.078735	0.752808	-4.18346	0.0150167
	1636446_at	FBgn0028837	CSN6	0.18495	3.80176	1.94915	0.0787753	0.752808	-4.18388	0.0150106
	1635745_a_at	FBgn0028479	Mtpalpha	0.150809	6.43286	1.94872	0.0788317	0.752808	-4.18446	0.0150019
	1641501_a_at	FBgn0003380	Sh	0.18381	4.22502	1.9486	0.0788473	0.752808	-4.18462	0.0149996
	1626044_at	FBgn0260795	NaPi-III	0.158007	5.11661	1.94843	0.0788698	0.752808	-4.18485	0.0149961
	1632565_at	FBgn0024491	Bin1	0.260238	2.55481	1.94818	0.0789027	0.752808	-4.18519	0.0149911
	1627667_at	FBgn0035393	CG16753	-0.174406	1.1511	-1.94802	0.0789248	0.752808	-4.18542	0.0149878
	1637946_at	FBgn0035951	CG5068	0.205718	1.8142	1.94788	0.0789432	0.752808	-4.18561	0.014985
	1635576_at	FBgn0040813	Nplp2	0.153863	10.2007	1.94745	0.0789998	0.752808	-4.18619	0.0149764
	1631114_a_at	FBgn0025702	Srpk79D	0.210575	3.42584	1.94699	0.0790604	0.752808	-4.18681	0.0149672
	1636765_at	FBgn0002781	mod(mdg4)	0.191622	0.391985	1.94692	0.0790697	0.752808	-4.18691	0.0149658
	1628020_at	FBgn0031373	CG15358	-0.206066	0.703956	-1.94655	0.0791195	0.752808	-4.18742	0.0149582
	1640702_at	FBgn0025740	PlexB	0.155207	0.42761	1.94613	0.0791753	0.752808	-4.188	0.0149498
	1635507_at	FBgn0034741	CG4269	0.311139	2.10838	1.9442	0.0794315	0.752808	-4.19062	0.0149111
	1635507_at	FBgn0050031	CG30031	0.311139	2.10838	1.9442	0.0794315	0.752808	-4.19062	0.0149111
	1633446_s_at	FBgn0036945	Ssk	-0.256923	5.553	-1.94385	0.0794774	0.752808	-4.19109	0.0149042
	1630212_at	FBgn0033204	CG2065	0.337681	2.57223	1.94261	0.0796432	0.752808	-4.19279	0.0148794
	1630699_at	FBgn0010395	Itgbn	0.235645	2.29757	1.94257	0.0796484	0.752808	-4.19284	0.0148786
	1630699_at	FBgn0010395	Itgbn	0.235645	2.29757	1.94257	0.0796484	0.752808	-4.19284	0.0148786
	1628110_s_at	FBgn0000581	E(Pc)	0.207104	0.69831	1.94203	0.0797198	0.752808	-4.19357	0.0148679
	1639890_at	FBgn0039970	CG17508	-0.150855	6.43949	-1.94178	0.079754	0.752808	-4.19392	0.0148628
	1631126_at	FBgn0014179	gcm	0.172056	0.150461	1.94101	0.0798565	0.752808	-4.19496	0.0148476
	1627752_s_at	FBgn0029761	SK	0.26296	2.11017	1.94098	0.0798603	0.752808	-4.195	0.014847
	1631971_at	FBgn0036207	CG10907	0.159623	4.2064	1.94037	0.0799424	0.752808	-4.19584	0.0148348
	1632727_at	FBgn0031733	CG14006	0.209809	3.60015	1.94017	0.0799686	0.752808	-4.1961	0.0148309
	1641488_at	FBgn0035632	Ppat-Dpck	-0.173176	3.18925	-1.93977	0.0800224	0.752808	-4.19665	0.0148229
	1641154_at	FBgn0034622	BBS9	0.167401	0.177717	1.93925	0.0800926	0.752808	-4.19736	0.0148125
	1632874_at	FBgn0035673	CG6602	0.182722	4.84376	1.93921	0.0800984	0.752808	-4.19742	0.0148116
	1640683_at	FBgn0036467	CG12310	-0.321481	4.05906	-1.93843	0.0802025	0.752808	-4.19848	0.0147962
	1637625_s_at	FBgn0052813	CG32813	-0.17104	3.43581	-1.93806	0.0802521	0.752808	-4.19898	0.0147889
	1625321_a_at	FBgn0260386	mtg	0.196865	1.63254	1.93804	0.0802552	0.752808	-4.19901	0.0147885
	1636384_at	FBgn0052703	Erk7	0.205543	4.23749	1.93801	0.0802593	0.752808	-4.19905	0.0147879
	1635043_at	FBgn0035410	CG14964	-0.209534	1.0125	-1.9374	0.0803411	0.752808	-4.19988	0.0147758
	1636844_at	FBgn0029173	prg	0.169032	0.718027	1.93713	0.0803777	0.752808	-4.20025	0.0147704
	1629899_at	FBgn0000250	cact	0.237028	4.2887	1.9368	0.0804218	0.752808	-4.20069	0.0147639
	1625235_at	FBgn0033792	CG13325	0.264724	5.10657	1.93612	0.0805127	0.752808	-4.20161	0.0147506
	1633435_a_at	FBgn0040031	CG12061	0.304259	3.65661	1.9354	0.0806101	0.752808	-4.20259	0.0147363
	1623455_s_at	FBgn0262735	Imp	0.1996	3.57377	1.93496	0.0806699	0.752808	-4.2032	0.0147276
	1641266_at	FBgn0259234	Camta	0.186988	0.5497	1.93472	0.0807014	0.752808	-4.20351	0.014723
	1629683_at	FBgn0283451	br	0.161338	0.0513373	1.93444	0.0807398	0.752808	-4.2039	0.0147174
	1639669_at	FBgn0038508	CG5866	-0.181513	0.0164094	-1.93437	0.0807497	0.752808	-4.204	0.0147159
	1640879_at	FBgn0053017	CG33017	0.198725	3.2396	1.93387	0.0808172	0.752808	-4.20468	0.0147061
	1633773_s_at	FBgn0038475	Keap1	0.20734	1.75548	1.93366	0.0808455	0.752808	-4.20496	0.014702
	1624159_at	FBgn0033775	Cyp9h1	0.264749	2.1737	1.93312	0.0809179	0.752808	-4.20569	0.0146915
	1626343_at	FBgn0035004	Pgam5-2	0.195517	0.744571	1.93281	0.0809609	0.752808	-4.20612	0.0146852
	1637800_at	FBgn0031513	CG3347	0.187614	1.42537	1.93271	0.0809739	0.752808	-4.20625	0.0146833
	1631309_at	FBgn0030966	shop	0.215082	1.80843	1.93249	0.0810034	0.752808	-4.20655	0.014679
	1630992_at	FBgn0039743	CG7946	0.215131	4.07866	1.93248	0.0810056	0.752808	-4.20657	0.0146787
	1629967_s_at	FBgn0041100	park	0.184873	2.97621	1.93142	0.0811493	0.752808	-4.20801	0.0146579
	1630795_at	FBgn0030037	Miga	0.30262	2.66099	1.93045	0.0812812	0.752808	-4.20933	0.0146389
	1636002_at	FBgn0025626	CG4281	0.208956	1.37029	1.93039	0.0812893	0.752808	-4.20941	0.0146377
	1636930_at	FBgn0031675	CG9121	-0.210395	1.62752	-1.92965	0.0813898	0.752808	-4.21041	0.0146232
	1625427_at	FBgn0038304	CG12241	0.173537	3.72752	1.92846	0.0815516	0.752808	-4.21202	0.0146
	1629921_a_at	FBgn0004837	Su(H)	0.227423	1.85299	1.92788	0.0816304	0.752808	-4.21281	0.0145888
	1632182_at	FBgn0030457	CG12096	0.179091	3.06408	1.92787	0.081632	0.752808	-4.21282	0.0145885
	1637146_at	FBgn0261584	CG42694	-0.170313	0.298891	-1.92767	0.0816595	0.752808	-4.2131	0.0145846
	1638537_at	FBgn0262869	Gfrl	-0.184667	0.129751	-1.9274	0.0816964	0.752808	-4.21346	0.0145793
	1638537_at	FBgn0262869	Gfrl	-0.184667	0.129751	-1.9274	0.0816964	0.752808	-4.21346	0.0145793
	1623242_at	FBgn0036793	CG4174	-0.19844	2.50014	-1.92734	0.0817048	0.752808	-4.21355	0.0145781
	1623242_at	FBgn0036799	CG13380	-0.19844	2.50014	-1.92734	0.0817048	0.752808	-4.21355	0.0145781
	1637059_s_at	FBgn0263106	DnaJ-1	0.158609	6.6485	1.92714	0.0817314	0.752808	-4.21381	0.0145743
	1634165_at	FBgn0040364	CG11378	0.202721	4.5603	1.92633	0.0818423	0.752808	-4.21491	0.0145585
	1629863_at	FBgn0038439	Cad89D	0.15193	0.170923	1.9263	0.0818471	0.752808	-4.21496	0.0145579
	1637956_s_at	FBgn0045862	btz	0.236765	2.401	1.92608	0.0818771	0.752808	-4.21526	0.0145536
	1636628_at	FBgn0033486	dmpd	0.176827	4.47372	1.92607	0.0818789	0.752808	-4.21528	0.0145533
	1636628_at	FBgn0033486	dmpd	0.176827	4.47372	1.92607	0.0818789	0.752808	-4.21528	0.0145533
	1639032_at	FBgn0027794	Lrpprc2	-0.172085	1.02938	-1.9257	0.0819295	0.752808	-4.21578	0.0145461
	1640436_at	FBgn0035256	CG13930	0.213285	0.187687	1.9255	0.081956	0.752808	-4.21604	0.0145424
	1640472_at	FBgn0262109	lncRNA:CR42862	0.150416	8.01075	1.92547	0.0819602	0.752808	-4.21608	0.0145418
	1633091_at	FBgn0030063	CG1789	-0.21641	1.82232	-1.92536	0.0819755	0.752808	-4.21623	0.0145396
	1639773_s_at	FBgn0004435	Galphaq	0.173614	5.41684	1.92467	0.0820701	0.752808	-4.21717	0.0145262
	1639773_s_at	FBgn0004435	Galphaq	0.173614	5.41684	1.92467	0.0820701	0.752808	-4.21717	0.0145262
	1636639_at	FBgn0031260	Spp	0.145576	6.24117	1.9245	0.0820928	0.752808	-4.21739	0.014523
	1638171_s_at	FBgn0031148	Cbs	0.223275	3.49441	1.92414	0.0821434	0.752808	-4.21789	0.0145158
	1641055_at	FBgn0001224	Hsp23	0.173314	6.21622	1.92396	0.0821677	0.752808	-4.21813	0.0145124
	1636719_s_at	FBgn0038704	CG5316	0.220251	0.955148	1.92388	0.0821781	0.752808	-4.21824	0.0145109
	1641672_at	FBgn0261836	Msp300	0.180575	1.48566	1.92343	0.0822407	0.752808	-4.21885	0.0145021
	1641672_at	FBgn0261836	Msp300	0.180575	1.48566	1.92343	0.0822407	0.752808	-4.21885	0.0145021
	1629430_s_at	FBgn0030362	regucalcin	0.158016	5.27296	1.92324	0.0822668	0.752808	-4.21911	0.0144984
	1632844_s_at	FBgn0035236	CG12004	0.171736	4.93355	1.92303	0.0822953	0.752808	-4.21939	0.0144944
	1637201_s_at	FBgn0261649	tinc	0.166085	0.480886	1.923	0.0822997	0.752808	-4.21944	0.0144938
	1632665_a_at	FBgn0030648	CG6340	0.182315	4.03301	1.92291	0.082312	0.752808	-4.21956	0.0144921
	1637265_at	FBgn0035839	CG7550	-0.204164	2.39744	-1.92289	0.082314	0.752808	-4.21958	0.0144918
	1630806_at	FBgn0000810	fs(1)K10	0.212929	1.05794	1.92204	0.0824321	0.752808	-4.22074	0.0144752
	1626927_at	FBgn0046874	Pif1B	0.180537	4.19087	1.92177	0.0824687	0.752808	-4.2211	0.01447
	1626927_at	FBgn0261015	Pif1A	0.180537	4.19087	1.92177	0.0824687	0.752808	-4.2211	0.01447
	1623465_at	FBgn0032268	CG6138	0.175217	5.58577	1.92167	0.0824826	0.752808	-4.22124	0.0144681
	1639653_at	FBgn0036756	Cln3	-0.154665	4.9099	-1.92096	0.082581	0.752808	-4.2222	0.0144543
	1639153_at	FBgn0263697	Uba3	-0.168509	1.92139	-1.92081	0.0826008	0.752808	-4.2224	0.0144515
	1640625_at	FBgn0085425	CG34396	-0.208123	0.299449	-1.92079	0.0826038	0.752808	-4.22243	0.0144511
	1630892_at	FBgn0034488	Hacl	-0.146266	4.39373	-1.92043	0.0826532	0.752808	-4.22291	0.0144442
	1639524_at	FBgn0262103	Sik3	0.189196	4.28153	1.9198	0.0827412	0.752808	-4.22378	0.0144319
	1634374_at	FBgn0053138	AGBE	0.152513	6.38813	1.91971	0.0827537	0.752808	-4.2239	0.0144302
	1634374_at	FBgn0053138	AGBE	0.152513	6.38813	1.91971	0.0827537	0.752808	-4.2239	0.0144302
	1639455_at	FBgn0267337	rn	0.204147	0.818551	1.91957	0.082772	0.752808	-4.22408	0.0144276
	1627868_at	FBgn0004901	Prat	0.223641	1.2291	1.91942	0.0827934	0.752808	-4.22429	0.0144246
	1638759_at	FBgn0261930	vnd	-0.151401	-0.0340833	-1.91891	0.0828636	0.752808	-4.22497	0.0144149
	1630380_at	FBgn0038279	Sdr	0.176515	1.51013	1.91845	0.082927	0.752808	-4.2256	0.0144061
	1630380_at	FBgn0038279	Sdr	0.176515	1.51013	1.91845	0.082927	0.752808	-4.2256	0.0144061
	1639789_at	FBgn0030359	CG18130	0.16524	4.21716	1.91837	0.0829391	0.752808	-4.22571	0.0144044
	1624747_at	FBgn0024920	Ts	-0.192767	0.595339	-1.91781	0.0830165	0.753149	-4.22647	0.0143936
	1629097_at	FBgn0001320	kni	0.180354	1.92436	1.9172	0.0831009	0.753541	-4.22729	0.014382
	1632139_at	FBgn0036036	CG14174	0.250893	1.84219	1.91692	0.0831392	0.753541	-4.22767	0.0143767
	1625399_at	FBgn0029727	CG6978	-0.207856	0.0985295	-1.91635	0.083219	0.75371	-4.22845	0.0143657
	1628324_at	FBgn0029893	CG14442	0.173892	3.36891	1.91564	0.0833182	0.754019	-4.22941	0.014352
	1640897_at	FBgn0039875	sip3	0.152372	5.77587	1.91536	0.0833571	0.754019	-4.22979	0.0143466
	1627410_at	FBgn0027356	Amph	0.164403	6.07727	1.91476	0.0834399	0.754019	-4.2306	0.0143352
	1639432_at	FBgn0067102	GlcT	0.170859	0.480101	1.91471	0.0834469	0.754019	-4.23066	0.0143343
	1624027_at	FBgn0260856	Membrin	0.168105	3.19022	1.914	0.0835455	0.754019	-4.23162	0.0143208
[truncated: 14,407 more rows]
